# Supplementary material for: Decoding Acheulean Percussive Technology: Experimental Approach to understanding Use-Wear Traces in different raw materials
Source: Research Square preprint supplement (doi:10.21203/rs.3.rs-8784816/v1), 2026-02-16
Supplement: Supplementary file 2 [file bc87fe7becd7f858ffbdf099.pdf]

## SOM 1

Equipment and settings:

| <b><i>Imaging technique</i></b> | <b><i>Equipment</i></b>                                                     | <b><i>Objective</i></b>                        | <b><i>Resolution</i></b>                                       | <b><i>Acquisition method</i></b>                    | <b><i>Software version</i></b>              |
|---------------------------------|-----------------------------------------------------------------------------|------------------------------------------------|----------------------------------------------------------------|-----------------------------------------------------|---------------------------------------------|
| <b>Photography</b>              | Nikon DSLR D160                                                             | Nikon AF-S VR Micro-Nikkor 105 mm f/2.8G IF-ED |                                                                |                                                     |                                             |
| <b>3D scanning</b>              | 3D structured-light scanner, Aicon SmartScan-HE R8 (now part of Hexagon AB) |                                                | Field of View: 110 × 80 × 70mm , 33 μm point-to-point distance | structured-light, ~16 scans on automatic turn table | OptoCat 2018R1                              |
| <b>3D digital microscopy</b>    | ZEISS Smartzoom 5                                                           | PlanApo D 1.6×/NA 0.1,WD 36 mm                 | Field of View: 10.475 × 7.856 mm (34x)                         | White LED, reflected ringlight, EDF / Stitching     | Smartzoom software with Shuttle&Find module |
| <b>Microscopy/Confocal*</b>     | Zeiss LSM 800 MAT                                                           | C Epiplan-Apochromat 20x NA 0.7                | Axial Res.: WF:1.122 μm<br>LSM: 1.247μm                        | BF /LSM                                             | Zen blue                                    |

\*More details on <https://zenodo.org/records/18309536>
