# Supplementary material for: Decoding Acheulean Percussive Technology: Experimental Approach to understanding Use-Wear Traces in different raw materials
Source: Research Square preprint supplement (doi:10.21203/rs.3.rs-8784816/v1), 2026-02-16
Supplement: Supplementary file 3 [file eb6217c7605160069b219d00.pdf]

# SOM4 - Reading and plotting Confocal data

Paixao, Gossa, Marreiros, Gneisinger, Hovers. 2025. Decoding Traces of Acheulean Percussive Technology

2026-01-25 11:38:44.001557

## Brief description of the script

This R markdown document reads, summarizes and plots data for: *Paixao et al. 2025. Decoding Traces of Acheulean Percussive Technology: Experimental Approach to understanding Use-Wear Traces in different raw materials. Submitted to JPA*

The document contains plots of the quantitative surface texture analysis, using Confocal microscopy.

This R project and respective scripts follow the procedures described by Marwick et al. 2017.

The authors would like to thank Ivan Calandra and Lisa Schunk for their help and contribution on several chunks of code included here in the script (pieces of code are also adapted from Calandra et al. 2019, Pedergrana et al. 2020a, 2020b).

To compile this markdown document do not delete or move files from their original folders. Please note that most of the tables and figures in this file do not match the numbering in the paper..

For any questions, comments and inputs, please contact:

Joao Marreiros, joao.marreiros@leiza.de

## Load data into R project

*Imported files are in: './analysis/raw\_data'*

*Figures are saved in: './analysis/plots'*

*Tables are saved in: './analysis/derived\_data'*

```
# Load required libraries
```

```
library(tidyverse)
```

```
## Warning: package 'tibble' was built under R version 4.3.3
```

```
## Warning: package 'tidyr' was built under R version 4.3.1
```

```
## Warning: package 'dplyr' was built under R version 4.3.1
```

```
## Warning: package 'lubridate' was built under R version 4.3.3
```

```
## -- Attaching core tidyverse packages ----- tidyverse 2.0.0 --
## v dplyr      1.1.4      v readr      2.1.6
## v forcats   1.0.1      v stringr   1.6.0
## v ggplot2   4.0.1      v tibble    3.3.0
## v lubridate 1.9.4      v tidyr     1.3.1
## v purrr     1.2.0
## -- Conflicts ----- tidyverse_conflicts() --
## x dplyr::filter() masks stats::filter()
## x dplyr::lag()     masks stats::lag()
## i Use the conflicted package (<http://conflicted.r-lib.org/>) to force all conflicts to become errors
```

```
library(utils)
library(knitr)
```

```
## Warning: package 'knitr' was built under R version 4.3.3
```

```
library(janitor)
```

```
## Warning: package 'janitor' was built under R version 4.3.3
```

```
##
## Attaching package: 'janitor'
##
## The following objects are masked from 'package:stats':
##
##   chisq.test, fisher.test
```

```
library(kableExtra)
```

```
## Warning: package 'kableExtra' was built under R version 4.3.1
```

```
##
## Attaching package: 'kableExtra'
##
## The following object is masked from 'package:dplyr':
##
##   group_rows
```

```
library(GGally)
library(doBy)
```

```
## Warning: package 'doBy' was built under R version 4.3.3
```

```
##
## Attaching package: 'doBy'
##
## The following object is masked from 'package:dplyr':
##
##   order_by
```

```
library(ggpubr)
library(tools)
library(ggthemes)
```

```
## Warning: package 'ggthemes' was built under R version 4.3.1
```

```
library(FactoMineR)
```

```
## Warning: package 'FactoMineR' was built under R version 4.3.1
```

```
library(factoextra)
```

```
## Welcome! Want to learn more? See two factoextra-related books at https://goo.gl/ve3WBa
```

```
# See your WD and update the following paths
```

```
# getwd()
```

```
# Load data from .csv
```

```
confocaldata <- read.delim("analysis/data/raw_data/surftext_db.csv", header = T, ";")
```

```
data_file <- list.files("analysis/data/raw_data/surftext_db", pattern = "\\*.csv$", full.names = TRUE)
```

```
md5_in <- md5sum(data_file)
```

```
info_in <- data.frame(file = basename(names(md5_in)), checksum = md5_in, row.names = NULL)
```

# Confocal micro surface texture data

## Import and summarize data

```
# compute descriptive statistics

nminmaxmeanmedsd <- function(x){
  y <- x[!is.na(x)]
  n_test <- length(y)
  min_test <- min(y)
  max_test <- max(y)
  mean_test <- mean(y)
  med_test <- median(y)
  sd_test <- sd(y)
  out <- c(n_test, min_test, max_test, mean_test, med_test, sd_test)
  names(out) <- c("n", "min", "max", "mean", "median", "sd")
  return(out)
}

num.var <- 23:ncol(confocaldata)

confostats <- summaryBy(.-Sample + Worked_material + Raw_material, data=confocaldata[c("Sample", "Worked_material", "Raw_material"), num.var])

write_csv(confostats, "analysis/data/derived_data/confocalstats_arch.csv")

head(confostats, 10)
```

```
##      Sample Worked_material Raw_material Sq.n   Sq.min   Sq.max   Sq.mean
## 1  DWG1S3          bone      Basalt     9  5.063730 10.650124  8.228798
## 2  DWG1S3          no_use     Basalt     3  7.892292 11.631849  9.528152
## 3  DWG3S1          bone      Scoria     9 10.268990 83.562071 27.477733
## 4  DWG3S1          no_use     Scoria     3 14.756695 30.180572 21.990032
## 5  KWG1S1          bone      Glassy_ign  9  4.917584 14.705605  9.591037
## 6  KWG1S1          no_use     Glassy_ign  3  6.177752 12.641063 10.287329
## 7  KWG1S3_         bone      Glassy_ign  8  3.766167  9.883735  7.076967
## 8  KWG1S3_         no_use     Glassy_ign  3  3.577717  6.211463  5.090712
## 9  MW6G2S1         bone      Regular_ign  9  7.503876 21.214706 13.486495
## 10 MW6G2S1         no_use     Regular_ign  3  8.210394 12.331760  9.594486
##      Sq.median   Sq.sd Ssk.n   Ssk.min   Ssk.max   Ssk.mean Ssk.median
## 1  8.648178  1.939212   9 -0.02251418  0.7577052  0.28357010  0.27415163
## 2  9.060314  1.913172   3 -0.14897681  0.1818577  0.02267047  0.03513049
## 3 22.219930 22.258847   9  0.37276137  2.1128103  1.02777103  0.91055760
## 4 21.032828  7.756364   3  0.42534413  1.0881790  0.68413355  0.53887753
## 5  9.813930  3.267261   9 -0.38810870  1.4721812  0.67796861  0.57816045
## 6 12.043172  3.571531   3  0.01244696  0.1114047  0.06844835  0.08149343
## 7  8.078204  2.560580   8 -0.04934925  3.6317140  1.38958223  0.80416487
## 8  5.482956  1.359980   3  0.38477194  1.7332947  0.97502239  0.80700054
## 9 13.625286  3.783788   9 -0.19782916  0.6546132  0.34455717  0.30583174
## 10 8.241303  2.370600   3  1.06912028  1.3486471  1.18832836  1.14721768
##      Ssk.sd Sku.n  Sku.min  Sku.max Sku.mean Sku.median  Sku.sd Sp.n
## 1  0.25123325   9  2.645284  4.479417  3.494612   3.314367  0.5977422   9
```

|       |                                        |           |           |           |           |           |                                         |             |
|-------|----------------------------------------|-----------|-----------|-----------|-----------|-----------|-----------------------------------------|-------------|
| ## 2  | 0.16576885                             | 3         | 2.757541  | 3.638224  | 3.271035  | 3.417338  | 0.4582075                               | 3           |
| ## 3  | 0.55292390                             | 9         | 2.519341  | 11.163102 | 6.626228  | 5.238011  | 3.0284775                               | 9           |
| ## 4  | 0.35448836                             | 3         | 3.100749  | 6.406618  | 4.667123  | 4.494004  | 1.6597199                               | 3           |
| ## 5  | 0.62423622                             | 9         | 3.262983  | 10.195028 | 6.539901  | 6.846613  | 2.6503588                               | 9           |
| ## 6  | 0.05075221                             | 3         | 2.607873  | 14.630243 | 6.764393  | 3.055065  | 6.8156937                               | 3           |
| ## 7  | 1.43450733                             | 8         | 3.223886  | 22.919378 | 9.667594  | 5.949720  | 8.0346084                               | 8           |
| ## 8  | 0.68978395                             | 3         | 5.404446  | 9.352493  | 7.393515  | 7.423604  | 1.9741956                               | 3           |
| ## 9  | 0.28236034                             | 9         | 2.838261  | 5.931765  | 4.039210  | 3.886268  | 1.0237456                               | 9           |
| ## 10 | 0.14422683                             | 3         | 5.035714  | 7.818396  | 6.313458  | 6.086265  | 1.4051838                               | 3           |
| ##    | Sp.min                                 | Sp.max    | Sp.mean   | Sp.median | Sp.sd     | Sv.n      | Sv.min                                  | Sv.max      |
| ## 1  | 17.18378                               | 39.87515  | 25.68341  | 24.58514  | 6.667521  | 9         | 14.97265                                | 34.40767    |
| ## 2  | 23.64134                               | 34.89050  | 31.01266  | 34.50615  | 6.386646  | 3         | 25.56008                                | 47.23796    |
| ## 3  | 40.30089                               | 199.88299 | 106.25727 | 107.04106 | 47.219908 | 9         | 34.78964                                | 143.30958   |
| ## 4  | 53.13381                               | 101.14910 | 84.18791  | 98.28082  | 26.931854 | 3         | 36.56090                                | 102.94767   |
| ## 5  | 17.78106                               | 81.18747  | 48.89975  | 45.94380  | 19.788620 | 9         | 15.02573                                | 59.00247    |
| ## 6  | 19.33636                               | 72.59322  | 42.22180  | 34.73584  | 27.406262 | 3         | 17.25796                                | 85.60943    |
| ## 7  | 17.26470                               | 64.96520  | 38.06369  | 37.78137  | 18.931496 | 8         | 12.67903                                | 32.49597    |
| ## 8  | 16.19630                               | 33.12118  | 27.17700  | 32.21352  | 9.520390  | 3         | 13.03301                                | 22.48445    |
| ## 9  | 22.75775                               | 70.05513  | 52.00632  | 55.02275  | 14.510714 | 9         | 20.23667                                | 58.05026    |
| ## 10 | 39.76457                               | 62.86922  | 50.26186  | 48.15180  | 11.695957 | 3         | 23.72950                                | 30.46131    |
| ##    | Sv.mean                                | Sv.median | Sv.sd     | Sz.n      | Sz.min    | Sz.max    | Sz.mean                                 | Sz.median   |
| ## 1  | 25.80182                               | 27.13677  | 6.691041  | 9         | 32.72492  | 67.01192  | 51.48523                                | 53.26250    |
| ## 2  | 33.59354                               | 27.98257  | 11.878333 | 3         | 49.20142  | 81.74410  | 64.60620                                | 62.87308    |
| ## 3  | 81.95437                               | 80.99841  | 37.894035 | 9         | 75.09053  | 343.19257 | 188.21164                               | 177.18170   |
| ## 4  | 69.63100                               | 69.38444  | 33.194071 | 3         | 89.69471  | 204.09678 | 153.81891                               | 167.66526   |
| ## 5  | 35.12224                               | 33.15965  | 16.559462 | 9         | 32.80680  | 120.18495 | 84.02198                                | 92.68390    |
| ## 6  | 50.06462                               | 47.32647  | 34.257906 | 3         | 36.59432  | 158.20266 | 92.28643                                | 82.06231    |
| ## 7  | 20.65125                               | 21.44169  | 6.930091  | 8         | 30.35188  | 88.82715  | 58.71495                                | 62.50386    |
| ## 8  | 16.52252                               | 14.05009  | 5.188172  | 3         | 29.22931  | 55.60564  | 43.69952                                | 46.26361    |
| ## 9  | 43.68278                               | 51.62774  | 13.521014 | 9         | 42.99442  | 128.10540 | 95.68911                                | 100.35808   |
| ## 10 | 27.34249                               | 27.83666  | 3.393004  | 3         | 63.49407  | 90.70588  | 77.60435                                | 78.61311    |
| ##    | Sz.sd                                  | Sa.n      | Sa.min    | Sa.max    | Sa.mean   | Sa.median | Sa.sd                                   |             |
| ## 1  | 11.05407                               | 9         | 4.021936  | 8.297740  | 6.396206  | 6.668945  | 1.5022141                               |             |
| ## 2  | 16.34042                               | 3         | 6.303812  | 9.215386  | 7.590523  | 7.252370  | 1.4849502                               |             |
| ## 3  | 79.49558                               | 9         | 7.600239  | 68.757057 | 20.352121 | 16.748056 | 18.8435653                              |             |
| ## 4  | 58.44441                               | 3         | 11.828620 | 22.091625 | 16.325167 | 15.055256 | 5.2480304                               |             |
| ## 5  | 32.05592                               | 9         | 3.880155  | 10.724066 | 6.981453  | 6.847019  | 2.4034272                               |             |
| ## 6  | 61.44548                               | 3         | 4.900318  | 10.324936 | 7.611112  | 7.608081  | 2.7123100                               |             |
| ## 7  | 23.44636                               | 8         | 2.922386  | 7.799800  | 4.699231  | 4.765441  | 1.6466088                               |             |
| ## 8  | 13.37381                               | 3         | 2.551167  | 4.348197  | 3.563063  | 3.789825  | 0.9197255                               |             |
| ## 9  | 26.73483                               | 9         | 6.049680  | 15.821603 | 10.214988 | 10.173646 | 2.7191844                               |             |
| ## 10 | 13.63392                               | 3         | 5.962861  | 9.005989  | 7.071227  | 6.244832  | 1.6814735                               |             |
| ##    | Smr...c...1.µm.below.highest.peak..n   |           |           |           |           |           | Smr...c...1.µm.below.highest.peak..min  |             |
| ## 1  |                                        |           |           |           |           |           | 9                                       | 0.129436652 |
| ## 2  |                                        |           |           |           |           |           | 3                                       | 0.136036764 |
| ## 3  |                                        |           |           |           |           |           | 9                                       | 0.003326797 |
| ## 4  |                                        |           |           |           |           |           | 3                                       | 0.010260262 |
| ## 5  |                                        |           |           |           |           |           | 9                                       | 0.003517030 |
| ## 6  |                                        |           |           |           |           |           | 3                                       | 0.003298784 |
| ## 7  |                                        |           |           |           |           |           | 8                                       | 0.026062347 |
| ## 8  |                                        |           |           |           |           |           | 3                                       | 0.019764275 |
| ## 9  |                                        |           |           |           |           |           | 9                                       | 0.002864635 |
| ## 10 |                                        |           |           |           |           |           | 3                                       | 0.014145319 |
| ##    | Smr...c...1.µm.below.highest.peak..max |           |           |           |           |           | Smr...c...1.µm.below.highest.peak..mean |             |

|       |                                          |                              |                      |                  |
|-------|------------------------------------------|------------------------------|----------------------|------------------|
| ## 1  | 0.25093810                               | 0.21134175                   |                      |                  |
| ## 2  | 0.17077097                               | 0.15171297                   |                      |                  |
| ## 3  | 0.09686346                               | 0.03621447                   |                      |                  |
| ## 4  | 0.02731155                               | 0.01631209                   |                      |                  |
| ## 5  | 0.11591567                               | 0.02776300                   |                      |                  |
| ## 6  | 0.18030579                               | 0.09874595                   |                      |                  |
| ## 7  | 0.16980952                               | 0.09269989                   |                      |                  |
| ## 8  | 0.17915327                               | 0.08656442                   |                      |                  |
| ## 9  | 0.19302423                               | 0.05522177                   |                      |                  |
| ## 10 | 0.03707106                               | 0.02264030                   |                      |                  |
| ##    | Smr..c...1.µm.below.highest.peak..median |                              |                      |                  |
| ## 1  | 0.23035046                               |                              |                      |                  |
| ## 2  | 0.14833118                               |                              |                      |                  |
| ## 3  | 0.01962398                               |                              |                      |                  |
| ## 4  | 0.01136444                               |                              |                      |                  |
| ## 5  | 0.01521358                               |                              |                      |                  |
| ## 6  | 0.11263326                               |                              |                      |                  |
| ## 7  | 0.08514802                               |                              |                      |                  |
| ## 8  | 0.06077572                               |                              |                      |                  |
| ## 9  | 0.02429787                               |                              |                      |                  |
| ## 10 | 0.01670453                               |                              |                      |                  |
| ##    | Smr..c...1.µm.below.highest.peak..sd     | Smc..p...10...n              | Smc..p...10...min    |                  |
| ## 1  | 0.040494607                              | 9                            | 6.691335             |                  |
| ## 2  | 0.017612314                              | 3                            | 10.320923            |                  |
| ## 3  | 0.034977543                              | 9                            | 11.058562            |                  |
| ## 4  | 0.009541802                              | 3                            | 19.783437            |                  |
| ## 5  | 0.034533409                              | 9                            | 6.171449             |                  |
| ## 6  | 0.089316926                              | 3                            | 8.294266             |                  |
| ## 7  | 0.053584958                              | 8                            | 4.493045             |                  |
| ## 8  | 0.082764762                              | 3                            | 4.059458             |                  |
| ## 9  | 0.059919024                              | 9                            | 9.722711             |                  |
| ## 10 | 0.012562742                              | 3                            | 8.844100             |                  |
| ##    | Smc..p...10...max                        | Smc..p...10...mean           | Smc..p...10...median | Smc..p...10...sd |
| ## 1  | 14.477477                                | 10.938276                    | 11.530379            | 2.6523625        |
| ## 2  | 14.746180                                | 12.156261                    | 11.401681            | 2.3071131        |
| ## 3  | 141.549348                               | 35.649246                    | 23.214725            | 40.8940784       |
| ## 4  | 40.863905                                | 27.474072                    | 21.774875            | 11.6386071       |
| ## 5  | 15.041786                                | 10.344946                    | 10.055254            | 3.4315575        |
| ## 6  | 16.366388                                | 11.981739                    | 11.284563            | 4.0809719        |
| ## 7  | 13.007607                                | 6.672026                     | 4.940842             | 3.1507142        |
| ## 8  | 5.908241                                 | 5.163481                     | 5.522745             | 0.9753476        |
| ## 9  | 28.779154                                | 16.539688                    | 14.991565            | 5.3545996        |
| ## 10 | 15.447508                                | 11.661309                    | 10.692319            | 3.4066782        |
| ##    | Sxp..p...50...q...97.5...n               | Sxp..p...50...q...97.5...min |                      |                  |
| ## 1  | 9                                        | 8.126920                     |                      |                  |
| ## 2  | 3                                        | 14.932044                    |                      |                  |
| ## 3  | 9                                        | 14.583036                    |                      |                  |
| ## 4  | 3                                        | 24.598504                    |                      |                  |
| ## 5  | 9                                        | 9.402009                     |                      |                  |
| ## 6  | 3                                        | 12.281577                    |                      |                  |
| ## 7  | 8                                        | 6.770593                     |                      |                  |
| ## 8  | 3                                        | 6.964112                     |                      |                  |
| ## 9  | 9                                        | 14.431524                    |                      |                  |
| ## 10 | 3                                        | 10.444185                    |                      |                  |

| ##    | Sxp..p...50...q...97.5...max    | Sxp..p...50...q...97.5...mean   |                                |                      |
|-------|---------------------------------|---------------------------------|--------------------------------|----------------------|
| ## 1  | 19.80979                        | 14.077415                       |                                |                      |
| ## 2  | 20.19767                        | 17.349271                       |                                |                      |
| ## 3  | 80.58646                        | 38.333654                       |                                |                      |
| ## 4  | 52.43185                        | 37.206342                       |                                |                      |
| ## 5  | 26.08240                        | 17.380564                       |                                |                      |
| ## 6  | 24.75996                        | 17.460145                       |                                |                      |
| ## 7  | 16.61239                        | 11.476646                       |                                |                      |
| ## 8  | 12.32030                        | 8.998026                        |                                |                      |
| ## 9  | 38.99502                        | 24.784749                       |                                |                      |
| ## 10 | 16.56297                        | 13.559731                       |                                |                      |
| ##    | Sxp..p...50...q...97.5...median | Sxp..p...50...q...97.5...sd     | Sal..s...0.2..n                |                      |
| ## 1  | 14.060023                       | 3.964723                        | 9                              |                      |
| ## 2  | 16.918101                       | 2.659160                        | 3                              |                      |
| ## 3  | 35.912080                       | 21.638165                       | 9                              |                      |
| ## 4  | 34.588675                       | 14.100103                       | 3                              |                      |
| ## 5  | 16.220668                       | 5.892286                        | 9                              |                      |
| ## 6  | 15.338894                       | 6.504022                        | 3                              |                      |
| ## 7  | 11.762347                       | 3.591365                        | 8                              |                      |
| ## 8  | 7.709669                        | 2.901219                        | 3                              |                      |
| ## 9  | 24.298570                       | 7.099866                        | 9                              |                      |
| ## 10 | 13.672034                       | 3.060939                        | 3                              |                      |
| ##    | Sal..s...0.2..min               | Sal..s...0.2..max               | Sal..s...0.2..mean             | Sal..s...0.2..median |
| ## 1  | 52.80412                        | 89.81858                        | 72.55206                       | 67.45247             |
| ## 2  | 61.91879                        | 86.93064                        | 71.14821                       | 64.59520             |
| ## 3  | 46.39301                        | 105.05251                       | 63.17700                       | 60.01913             |
| ## 4  | 48.17865                        | 71.49917                        | 59.97350                       | 60.24269             |
| ## 5  | 42.20291                        | 73.66658                        | 60.09439                       | 60.29915             |
| ## 6  | 37.49694                        | 89.63585                        | 66.61831                       | 72.72213             |
| ## 7  | 32.42020                        | 79.58032                        | 55.62719                       | 60.45598             |
| ## 8  | 37.19822                        | 48.70143                        | 44.04602                       | 46.23842             |
| ## 9  | 46.28510                        | 84.34683                        | 57.68914                       | 53.14922             |
| ## 10 | 38.91076                        | 54.21957                        | 47.81911                       | 50.32702             |
| ##    | Sal..s...0.2..sd                | Std..Reference.angle...0...n    | Std..Reference.angle...0...min |                      |
| ## 1  | 12.775287                       | 9                               | 3.253287                       |                      |
| ## 2  | 13.733340                       | 3                               | 2.757417                       |                      |
| ## 3  | 16.723446                       | 9                               | 16.500067                      |                      |
| ## 4  | 11.662592                       | 3                               | 3.753496                       |                      |
| ## 5  | 9.121335                        | 9                               | 73.251527                      |                      |
| ## 6  | 26.599981                       | 3                               | 20.000148                      |                      |
| ## 7  | 16.115243                       | 8                               | 16.493768                      |                      |
| ## 8  | 6.056890                        | 3                               | 39.252011                      |                      |
| ## 9  | 12.802860                       | 9                               | 58.002030                      |                      |
| ## 10 | 7.956576                        | 3                               | 7.759671                       |                      |
| ##    | Std..Reference.angle...0...max  | Std..Reference.angle...0...mean |                                |                      |
| ## 1  | 174.24867                       | 60.27726                        |                                |                      |
| ## 2  | 86.24629                        | 47.66927                        |                                |                      |
| ## 3  | 167.25349                       | 63.13998                        |                                |                      |
| ## 4  | 98.74818                        | 49.99662                        |                                |                      |
| ## 5  | 173.99388                       | 114.08134                       |                                |                      |
| ## 6  | 73.25047                        | 47.83506                        |                                |                      |
| ## 7  | 100.00630                       | 76.71804                        |                                |                      |
| ## 8  | 93.51012                        | 73.17181                        |                                |                      |
| ## 9  | 137.74483                       | 111.97084                       |                                |                      |

|       |                                   |                               |                     |                   |                |                  |           |
|-------|-----------------------------------|-------------------------------|---------------------|-------------------|----------------|------------------|-----------|
| ## 10 |                                   |                               | 163.00255           |                   |                | 81.25326         |           |
| ##    | Std..Reference.angle...0...median | Std..Reference.angle...0...sd | Sdq.n               |                   |                |                  |           |
| ## 1  |                                   |                               | 22.50332            |                   |                | 63.76333         | 9         |
| ## 2  |                                   |                               | 54.00410            |                   |                | 42.10339         | 3         |
| ## 3  |                                   |                               | 50.50421            |                   |                | 49.60585         | 9         |
| ## 4  |                                   |                               | 47.48818            |                   |                | 47.54699         | 3         |
| ## 5  |                                   |                               | 98.49042            |                   |                | 36.70735         | 9         |
| ## 6  |                                   |                               | 50.25455            |                   |                | 26.70748         | 3         |
| ## 7  |                                   |                               | 79.99869            |                   |                | 26.26219         | 8         |
| ## 8  |                                   |                               | 86.75329            |                   |                | 29.56904         | 3         |
| ## 9  |                                   |                               | 120.50400           |                   |                | 27.26386         | 9         |
| ## 10 |                                   |                               | 72.99756            |                   |                | 77.95002         | 3         |
| ##    | Sdq.min                           | Sdq.max                       | Sdq.mean            | Sdq.median        | Sdq.sd         | Sdr.n            | Sdr.min   |
| ## 1  | 0.5884395                         | 0.9309811                     | 0.7006765           | 0.7016803         | 0.09898725     | 9                | 13.713395 |
| ## 2  | 0.6757145                         | 0.9302041                     | 0.8183018           | 0.8489867         | 0.12999003     | 3                | 17.018494 |
| ## 3  | 1.0971752                         | 4.9937168                     | 2.6542813           | 2.2442055         | 1.24940342     | 9                | 30.359955 |
| ## 4  | 1.3396451                         | 2.4753302                     | 2.0027938           | 2.1934061         | 0.59135014     | 3                | 26.424201 |
| ## 5  | 0.5672499                         | 1.3066440                     | 0.9607505           | 0.9870976         | 0.23254134     | 9                | 11.363945 |
| ## 6  | 0.6395680                         | 1.3057172                     | 0.9853017           | 1.0106198         | 0.33379552     | 3                | 14.090017 |
| ## 7  | 0.4935876                         | 1.3520065                     | 0.8000794           | 0.6770484         | 0.35102302     | 8                | 9.142846  |
| ## 8  | 0.5035897                         | 0.7846100                     | 0.6550251           | 0.6768755         | 0.14177866     | 3                | 9.750539  |
| ## 9  | 0.6536768                         | 2.0432940                     | 1.3418718           | 1.2713830         | 0.41681690     | 9                | 15.945458 |
| ## 10 | 0.9446065                         | 1.4581162                     | 1.1680681           | 1.1014818         | 0.26315082     | 3                | 23.386377 |
| ##    | Sdr.max                           | Sdr.mean                      | Sdr.median          | Sdr.sd            | Vm..p...10...n | Vm..p...10...min |           |
| ## 1  | 23.84170                          | 17.68615                      | 17.97856            | 2.955713          | 9              | 0.3201235        |           |
| ## 2  | 27.12620                          | 22.19458                      | 22.43903            | 5.058284          | 3              | 0.3489735        |           |
| ## 3  | 104.27514                         | 53.93267                      | 45.30116            | 26.073466         | 9              | 0.8999336        |           |
| ## 4  | 61.04453                          | 44.88199                      | 47.17725            | 17.423919         | 3              | 0.8142877        |           |
| ## 5  | 26.97951                          | 20.42928                      | 21.22632            | 5.333596          | 9              | 0.2836160        |           |
| ## 6  | 28.43362                          | 23.38228                      | 27.62321            | 8.057532          | 3              | 0.3003648        |           |
| ## 7  | 25.44176                          | 15.97144                      | 15.02754            | 6.137314          | 8              | 0.2254618        |           |
| ## 8  | 18.28971                          | 13.78189                      | 13.30541            | 4.289479          | 3              | 0.2927578        |           |
| ## 9  | 54.82298                          | 33.40845                      | 32.01672            | 11.438759         | 9              | 0.3687425        |           |
| ## 10 | 39.18970                          | 30.68873                      | 29.49013            | 7.969549          | 3              | 0.6872419        |           |
| ##    | Vm..p...10...max                  | Vm..p...10...mean             | Vm..p...10...median | Vm..p...10...sd   |                |                  |           |
| ## 1  | 0.7716772                         |                               | 0.4867815           | 0.4420677         |                | 0.13705388       |           |
| ## 2  | 0.5319171                         |                               | 0.4362017           | 0.4277146         |                | 0.09176663       |           |
| ## 3  | 3.2005335                         |                               | 2.0836236           | 2.2646496         |                | 0.76888228       |           |
| ## 4  | 2.2955337                         |                               | 1.7731366           | 2.2095883         |                | 0.83149869       |           |
| ## 5  | 1.4529470                         |                               | 0.7806336           | 0.7299465         |                | 0.39975484       |           |
| ## 6  | 1.1006135                         |                               | 0.6477983           | 0.5424166         |                | 0.41040036       |           |
| ## 7  | 1.4390420                         |                               | 0.7262197           | 0.5971844         |                | 0.47004765       |           |
| ## 8  | 0.6136174                         |                               | 0.4874212           | 0.5558884         |                | 0.17103664       |           |
| ## 9  | 1.5783698                         |                               | 0.9547482           | 0.8878558         |                | 0.38241026       |           |
| ## 10 | 1.1523588                         |                               | 0.8508590           | 0.7129763         |                | 0.26142328       |           |
| ##    | Vv..p...10...n                    | Vv..p...10...min              | Vv..p...10...max    | Vv..p...10...mean |                |                  |           |
| ## 1  | 9                                 | 7.011406                      | 15.065817           | 11.425060         |                |                  |           |
| ## 2  | 3                                 | 10.669988                     | 15.278133           | 12.592513         |                |                  |           |
| ## 3  | 9                                 | 11.958407                     | 143.821705          | 37.733038         |                |                  |           |
| ## 4  | 3                                 | 20.597814                     | 43.159485           | 29.247207         |                |                  |           |
| ## 5  | 9                                 | 6.455019                      | 16.493383           | 11.125575         |                |                  |           |
| ## 6  | 3                                 | 8.594619                      | 16.908842           | 12.629500         |                |                  |           |
| ## 7  | 8                                 | 4.837232                      | 13.619321           | 7.398182          |                |                  |           |
| ## 8  | 3                                 | 4.352180                      | 6.464198            | 5.650918          |                |                  |           |

|       |                               |                             |                      |                   |
|-------|-------------------------------|-----------------------------|----------------------|-------------------|
| ## 9  | 9                             | 10.091505                   | 30.357493            | 17.494477         |
| ## 10 | 3                             | 9.557139                    | 16.599846            | 12.512158         |
| ##    | Vv..p...10...median           | Vv..p...10...sd             | Vmp..p...10...n      | Vmp..p...10...min |
| ## 1  | 12.141650                     | 2.754885                    | 9                    | 0.3201235         |
| ## 2  | 11.829417                     | 2.396974                    | 3                    | 0.3489735         |
| ## 3  | 25.821679                     | 41.100204                   | 9                    | 0.8999336         |
| ## 4  | 23.984323                     | 12.166787                   | 3                    | 0.8142877         |
| ## 5  | 10.871803                     | 3.680743                    | 9                    | 0.2836160         |
| ## 6  | 12.385040                     | 4.162499                    | 3                    | 0.3003648         |
| ## 7  | 5.883944                      | 3.118801                    | 8                    | 0.2254618         |
| ## 8  | 6.136375                      | 1.136621                    | 3                    | 0.2927578         |
| ## 9  | 16.419288                     | 5.652112                    | 9                    | 0.3687425         |
| ## 10 | 11.379487                     | 3.655426                    | 3                    | 0.6872419         |
| ##    | Vmp..p...10...max             | Vmp..p...10...mean          | Vmp..p...10...median | Vmp..p...10...sd  |
| ## 1  | 0.7716772                     | 0.4867815                   | 0.4420677            | 0.13705388        |
| ## 2  | 0.5319171                     | 0.4362017                   | 0.4277146            | 0.09176663        |
| ## 3  | 3.2005335                     | 2.0836236                   | 2.2646496            | 0.76888228        |
| ## 4  | 2.2955337                     | 1.7731366                   | 2.2095883            | 0.83149869        |
| ## 5  | 1.4529470                     | 0.7806336                   | 0.7299465            | 0.39975484        |
| ## 6  | 1.1006135                     | 0.6477983                   | 0.5424166            | 0.41040036        |
| ## 7  | 1.4390420                     | 0.7262197                   | 0.5971844            | 0.47004765        |
| ## 8  | 0.6136174                     | 0.4874212                   | 0.5558884            | 0.17103664        |
| ## 9  | 1.5783698                     | 0.9547482                   | 0.8878558            | 0.38241026        |
| ## 10 | 1.1523588                     | 0.8508590                   | 0.7129763            | 0.26142328        |
| ##    | Vmc..p...10...q...80...n      | Vmc..p...10...q...80...min  |                      |                   |
| ## 1  | 9                             | 4.450422                    |                      |                   |
| ## 2  | 3                             | 7.467709                    |                      |                   |
| ## 3  | 9                             | 7.976398                    |                      |                   |
| ## 4  | 3                             | 13.587119                   |                      |                   |
| ## 5  | 9                             | 4.397925                    |                      |                   |
| ## 6  | 3                             | 5.169091                    |                      |                   |
| ## 7  | 8                             | 3.102471                    |                      |                   |
| ## 8  | 3                             | 2.505969                    |                      |                   |
| ## 9  | 9                             | 6.893585                    |                      |                   |
| ## 10 | 3                             | 6.229499                    |                      |                   |
| ##    | Vmc..p...10...q...80...max    | Vmc..p...10...q...80...mean |                      |                   |
| ## 1  | 9.592246                      | 7.096468                    |                      |                   |
| ## 2  | 10.260280                     | 8.678579                    |                      |                   |
| ## 3  | 63.894370                     | 19.246766                   |                      |                   |
| ## 4  | 20.738619                     | 16.329152                   |                      |                   |
| ## 5  | 11.618668                     | 7.257442                    |                      |                   |
| ## 6  | 11.552078                     | 8.068189                    |                      |                   |
| ## 7  | 8.515048                      | 4.572191                    |                      |                   |
| ## 8  | 4.488539                      | 3.536744                    |                      |                   |
| ## 9  | 16.386982                     | 11.232513                   |                      |                   |
| ## 10 | 9.091423                      | 7.238928                    |                      |                   |
| ##    | Vmc..p...10...q...80...median | Vmc..p...10...q...80...sd   |                      |                   |
| ## 1  | 7.003398                      | 1.8211751                   |                      |                   |
| ## 2  | 8.307747                      | 1.4327421                   |                      |                   |
| ## 3  | 14.478823                     | 17.4102465                  |                      |                   |
| ## 4  | 14.661717                     | 3.8563247                   |                      |                   |
| ## 5  | 6.779995                      | 2.5811942                   |                      |                   |
| ## 6  | 7.483400                      | 3.2314262                   |                      |                   |
| ## 7  | 3.820601                      | 1.8489941                   |                      |                   |

|       |                               |                             |                              |                      |
|-------|-------------------------------|-----------------------------|------------------------------|----------------------|
| ## 8  | 3.615725                      | 0.9936424                   |                              |                      |
| ## 9  | 10.824962                     | 2.6821851                   |                              |                      |
| ## 10 | 6.395861                      | 1.6064626                   |                              |                      |
| ##    | Vvc..p...10...q...80...n      | Vvc..p...10...q...80...min  |                              |                      |
| ## 1  | 9                             | 6.578057                    |                              |                      |
| ## 2  | 3                             | 9.829754                    |                              |                      |
| ## 3  | 9                             | 10.950992                   |                              |                      |
| ## 4  | 3                             | 19.388028                   |                              |                      |
| ## 5  | 9                             | 5.947101                    |                              |                      |
| ## 6  | 3                             | 7.878771                    |                              |                      |
| ## 7  | 8                             | 4.306807                    |                              |                      |
| ## 8  | 3                             | 3.885029                    |                              |                      |
| ## 9  | 9                             | 9.332079                    |                              |                      |
| ## 10 | 3                             | 8.780407                    |                              |                      |
| ##    | Vvc..p...10...q...80...max    | Vvc..p...10...q...80...mean |                              |                      |
| ## 1  | 14.144531                     | 10.612759                   |                              |                      |
| ## 2  | 14.017012                     | 11.581646                   |                              |                      |
| ## 3  | 138.758852                    | 35.409369                   |                              |                      |
| ## 4  | 40.128179                     | 27.149625                   |                              |                      |
| ## 5  | 15.242880                     | 10.082201                   |                              |                      |
| ## 6  | 15.519505                     | 11.519225                   |                              |                      |
| ## 7  | 12.731895                     | 6.697255                    |                              |                      |
| ## 8  | 5.705291                      | 5.088036                    |                              |                      |
| ## 9  | 28.170450                     | 16.082099                   |                              |                      |
| ## 10 | 15.689234                     | 11.767761                   |                              |                      |
| ##    | Vvc..p...10...q...80...median | Vvc..p...10...q...80...sd   | Vvv..p...80...n              |                      |
| ## 1  | 11.160474                     | 2.577457                    | 9                            |                      |
| ## 2  | 10.898172                     | 2.175692                    | 3                            |                      |
| ## 3  | 23.018057                     | 39.961589                   | 9                            |                      |
| ## 4  | 21.932669                     | 11.311540                   | 3                            |                      |
| ## 5  | 9.691994                      | 3.370331                    | 9                            |                      |
| ## 6  | 11.159399                     | 3.833055                    | 3                            |                      |
| ## 7  | 5.146900                      | 2.962287                    | 8                            |                      |
| ## 8  | 5.673789                      | 1.041954                    | 3                            |                      |
| ## 9  | 14.489728                     | 5.314823                    | 9                            |                      |
| ## 10 | 10.833641                     | 3.547874                    | 3                            |                      |
| ##    | Vvv..p...80...min             | Vvv..p...80...max           | Vvv..p...80...mean           | Vvv..p...80...median |
| ## 1  | 0.4333487                     | 1.1209188                   | 0.8123011                    | 0.9146472            |
| ## 2  | 0.8402340                     | 1.2611208                   | 1.0108667                    | 0.9312452            |
| ## 3  | 0.9118226                     | 5.0628535                   | 2.3236692                    | 1.7662483            |
| ## 4  | 1.2097860                     | 3.0313052                   | 2.0975818                    | 2.0516542            |
| ## 5  | 0.5079180                     | 1.5227824                   | 1.0433743                    | 1.1798090            |
| ## 6  | 0.7158476                     | 1.3893372                   | 1.1102753                    | 1.2256412            |
| ## 7  | 0.3750757                     | 0.9281178                   | 0.7009262                    | 0.7370450            |
| ## 8  | 0.4625862                     | 0.7589066                   | 0.5628813                    | 0.4671511            |
| ## 9  | 0.7594260                     | 2.1870439                   | 1.4123781                    | 1.3787802            |
| ## 10 | 0.5458456                     | 0.9106123                   | 0.7443969                    | 0.7767329            |
| ##    | Vvv..p...80...sd              | Maximum.depth.of.furrows.n  | Maximum.depth.of.furrows.min |                      |
| ## 1  | 0.2172396                     | 9                           | 16.75276                     |                      |
| ## 2  | 0.2214523                     | 3                           | 26.26104                     |                      |
| ## 3  | 1.4025854                     | 9                           | 31.68333                     |                      |
| ## 4  | 0.9116277                     | 3                           | 43.47218                     |                      |
| ## 5  | 0.3409910                     | 9                           | 18.23597                     |                      |
| ## 6  | 0.3512535                     | 3                           | 18.99557                     |                      |

|       |                                 |                               |                           |
|-------|---------------------------------|-------------------------------|---------------------------|
| ## 7  | 0.2143057                       | 8                             | 15.77026                  |
| ## 8  | 0.1697782                       | 3                             | 17.81542                  |
| ## 9  | 0.4705498                       | 9                             | 20.92165                  |
| ## 10 | 0.1845207                       | 3                             | 28.94002                  |
| ##    | Maximum.depth.of.furrows.max    | Maximum.depth.of.furrows.mean |                           |
| ## 1  | 28.83774                        | 21.54506                      |                           |
| ## 2  | 31.86601                        | 29.10138                      |                           |
| ## 3  | 157.73925                       | 91.79489                      |                           |
| ## 4  | 94.90850                        | 68.66226                      |                           |
| ## 5  | 43.65327                        | 30.76170                      |                           |
| ## 6  | 52.50780                        | 38.57436                      |                           |
| ## 7  | 43.72077                        | 25.72067                      |                           |
| ## 8  | 21.53994                        | 20.02998                      |                           |
| ## 9  | 81.78266                        | 48.70766                      |                           |
| ## 10 | 46.65155                        | 36.33151                      |                           |
| ##    | Maximum.depth.of.furrows.median | Maximum.depth.of.furrows.sd   |                           |
| ## 1  | 21.92627                        | 3.686675                      |                           |
| ## 2  | 29.17709                        | 2.803250                      |                           |
| ## 3  | 73.12573                        | 44.307745                     |                           |
| ## 4  | 67.60612                        | 25.734420                     |                           |
| ## 5  | 31.80954                        | 8.295442                      |                           |
| ## 6  | 44.21971                        | 17.454793                     |                           |
| ## 7  | 26.24559                        | 9.492498                      |                           |
| ## 8  | 20.73457                        | 1.959682                      |                           |
| ## 9  | 47.11639                        | 19.231349                     |                           |
| ## 10 | 33.40297                        | 9.211778                      |                           |
| ##    | Mean.depth.of.furrows.n         | Mean.depth.of.furrows.min     | Mean.depth.of.furrows.max |
| ## 1  | 9                               | 6.002999                      | 9.051419                  |
| ## 2  | 3                               | 7.461272                      | 8.622203                  |
| ## 3  | 9                               | 11.185208                     | 46.111107                 |
| ## 4  | 3                               | 15.187073                     | 29.205054                 |
| ## 5  | 9                               | 5.064537                      | 12.064219                 |
| ## 6  | 3                               | 5.696616                      | 10.593519                 |
| ## 7  | 8                               | 4.347303                      | 9.174991                  |
| ## 8  | 3                               | 4.664563                      | 6.692360                  |
| ## 9  | 9                               | 7.641667                      | 23.177453                 |
| ## 10 | 3                               | 9.069816                      | 17.681250                 |
| ##    | Mean.depth.of.furrows.mean      | Mean.depth.of.furrows.median  |                           |
| ## 1  | 7.843046                        | 8.187588                      |                           |
| ## 2  | 7.852543                        | 7.474154                      |                           |
| ## 3  | 26.426294                       | 26.784884                     |                           |
| ## 4  | 23.349417                       | 25.656125                     |                           |
| ## 5  | 8.885741                        | 7.902523                      |                           |
| ## 6  | 8.656570                        | 9.679574                      |                           |
| ## 7  | 6.845322                        | 6.933926                      |                           |
| ## 8  | 5.459767                        | 5.022376                      |                           |
| ## 9  | 13.799330                       | 12.461877                     |                           |
| ## 10 | 12.941694                       | 12.074016                     |                           |
| ##    | Mean.depth.of.furrows.sd        | Mean.density.of.furrows.n     |                           |
| ## 1  | 0.9466227                       | 9                             |                           |
| ## 2  | 0.6665760                       | 3                             |                           |
| ## 3  | 13.6833953                      | 9                             |                           |
| ## 4  | 7.2881153                       | 3                             |                           |
| ## 5  | 2.5903413                       | 9                             |                           |

|       |                              |                                |                        |
|-------|------------------------------|--------------------------------|------------------------|
| ## 6  | 2.6038085                    | 3                              |                        |
| ## 7  | 1.7637038                    | 8                              |                        |
| ## 8  | 1.0823459                    | 3                              |                        |
| ## 9  | 4.2665737                    | 9                              |                        |
| ## 10 | 4.3707951                    | 3                              |                        |
| ##    | Mean.density.of.furrows.min  | Mean.density.of.furrows.max    |                        |
| ## 1  | 2298.821                     | 2605.148                       |                        |
| ## 2  | 2366.364                     | 2522.769                       |                        |
| ## 3  | 1791.625                     | 2919.208                       |                        |
| ## 4  | 2297.497                     | 2494.644                       |                        |
| ## 5  | 2643.277                     | 2901.836                       |                        |
| ## 6  | 2564.022                     | 2924.246                       |                        |
| ## 7  | 2680.364                     | 2971.561                       |                        |
| ## 8  | 2669.025                     | 2869.392                       |                        |
| ## 9  | 2386.039                     | 2750.615                       |                        |
| ## 10 | 2378.525                     | 2699.401                       |                        |
| ##    | Mean.density.of.furrows.mean | Mean.density.of.furrows.median |                        |
| ## 1  | 2432.042                     | 2411.718                       |                        |
| ## 2  | 2449.421                     | 2459.131                       |                        |
| ## 3  | 2439.866                     | 2475.756                       |                        |
| ## 4  | 2389.146                     | 2375.297                       |                        |
| ## 5  | 2781.130                     | 2792.991                       |                        |
| ## 6  | 2718.721                     | 2667.893                       |                        |
| ## 7  | 2836.581                     | 2842.739                       |                        |
| ## 8  | 2783.521                     | 2812.145                       |                        |
| ## 9  | 2495.761                     | 2453.730                       |                        |
| ## 10 | 2519.780                     | 2481.414                       |                        |
| ##    | Mean.density.of.furrows.sd   | First.direction.n              | First.direction.min    |
| ## 1  | 90.81019                     | 9                              | 0.013088863            |
| ## 2  | 78.65352                     | 3                              | 0.017821948            |
| ## 3  | 348.19673                    | 9                              | 0.007610828            |
| ## 4  | 99.30027                     | 3                              | 0.007410580            |
| ## 5  | 90.04938                     | 9                              | 0.022110916            |
| ## 6  | 185.41275                    | 3                              | 0.009692957            |
| ## 7  | 89.66514                     | 8                              | 0.019557202            |
| ## 8  | 103.20532                    | 3                              | 44.976009260           |
| ## 9  | 116.42962                    | 9                              | 0.009121793            |
| ## 10 | 163.84231                    | 3                              | 89.994521960           |
| ##    | First.direction.max          | First.direction.mean           | First.direction.median |
| ## 1  | 179.99750                    | 99.99916                       | 90.00905               |
| ## 2  | 89.99993                     | 48.75543                       | 56.24853               |
| ## 3  | 135.00784                    | 62.94580                       | 89.98562               |
| ## 4  | 179.99790                    | 75.00878                       | 45.02103               |
| ## 5  | 134.97617                    | 80.00343                       | 90.00258               |
| ## 6  | 90.01321                     | 45.01000                       | 45.00709               |
| ## 7  | 135.00618                    | 84.37119                       | 89.99210               |
| ## 8  | 90.01678                     | 74.99408                       | 89.98945               |
| ## 9  | 135.02644                    | 95.89072                       | 116.49217              |
| ## 10 | 179.99868                    | 120.00121                      | 90.01043               |
| ##    | First.direction.sd           | Second.direction.n             | Second.direction.min   |
| ## 1  | 62.74469                     | 9                              | 0.002585364            |
| ## 2  | 45.45663                     | 3                              | 0.006468474            |
| ## 3  | 47.03073                     | 9                              | 0.002699942            |
| ## 4  | 93.66746                     | 3                              | 90.002718820           |

|       |                      |                       |                         |
|-------|----------------------|-----------------------|-------------------------|
| ## 5  | 37.49037             | 9                     | 44.985288150            |
| ## 6  | 45.00176             | 3                     | 26.457376620            |
| ## 7  | 44.58743             | 8                     | 0.001381717             |
| ## 8  | 25.99642             | 3                     | 89.979640140            |
| ## 9  | 46.49592             | 9                     | 0.002614089             |
| ## 10 | 51.95933             | 3                     | 63.531150460            |
| ##    | Second.direction.max | Second.direction.mean | Second.direction.median |
| ## 1  | 179.99306            | 119.99597             | 135.00156               |
| ## 2  | 179.99690            | 104.99997             | 134.99653               |
| ## 3  | 179.99947            | 114.11516             | 153.50994               |
| ## 4  | 134.99764            | 119.99888             | 134.99629               |
| ## 5  | 161.50171            | 95.00381              | 90.01268                |
| ## 6  | 89.99463             | 59.99360              | 63.52880                |
| ## 7  | 179.98498            | 100.33798             | 125.73907               |
| ## 8  | 135.00017            | 119.99310             | 134.99950               |
| ## 9  | 135.01137            | 98.74237              | 116.44870               |
| ## 10 | 179.98588            | 126.16501             | 134.97800               |
| ##    | Second.direction.sd  | Third.direction.n     | Third.direction.min     |
| ## 1  | 74.61905             | 9                     | 2.648285e+01            |
| ## 2  | 93.66955             | 3                     | 4.499814e+01            |
| ## 3  | 70.07597             | 9                     | 1.849645e+01            |
| ## 4  | 25.97744             | 3                     | 3.375555e+01            |
| ## 5  | 47.08987             | 9                     | 2.750789e-02            |
| ## 6  | 31.91581             | 3                     | 8.351778e-03            |
| ## 7  | 66.92108             | 8                     | 4.500393e+01            |
| ## 8  | 25.99242             | 3                     | 1.164543e+02            |
| ## 9  | 44.75928             | 9                     | 7.203658e-03            |
| ## 10 | 58.72544             | 3                     | 1.137504e-02            |
| ##    | Third.direction.max  | Third.direction.mean  | Third.direction.median  |
| ## 1  | 134.99924            | 65.88912              | 45.02250                |
| ## 2  | 63.51498             | 51.17054              | 44.99851                |
| ## 3  | 179.99760            | 99.99419              | 90.00803                |
| ## 4  | 135.00765            | 86.25359              | 89.99757                |
| ## 5  | 171.76576            | 84.08464              | 71.48723                |
| ## 6  | 179.98774            | 81.17287              | 63.52252                |
| ## 7  | 135.02127            | 108.77886             | 125.73425               |
| ## 8  | 179.96919            | 143.81446             | 135.01991               |
| ## 9  | 108.53240            | 47.50569              | 45.00770                |
| ## 10 | 45.01071             | 30.00515              | 44.99337                |
| ##    | Third.direction.sd   | Texture.isotropy.n    | Texture.isotropy.min    |
| ## 1  | 36.96718             | 9                     | 47.13495                |
| ## 2  | 10.69059             | 3                     | 70.77438                |
| ## 3  | 61.76833             | 9                     | 26.13837                |
| ## 4  | 50.72978             | 3                     | 69.61484                |
| ## 5  | 58.77415             | 9                     | 11.64210                |
| ## 6  | 91.27867             | 3                     | 38.21673                |
| ## 7  | 34.08861             | 8                     | 26.78453                |
| ## 8  | 32.65798             | 3                     | 70.47470                |
| ## 9  | 43.22885             | 9                     | 30.58442                |
| ## 10 | 25.97537             | 3                     | 85.89070                |
| ##    | Texture.isotropy.max | Texture.isotropy.mean | Texture.isotropy.median |
| ## 1  | 84.73920             | 72.46804              | 75.69371                |
| ## 2  | 75.44572             | 72.89308              | 72.45914                |
| ## 3  | 92.30589             | 71.54840              | 77.46036                |

|       |                                                                |              |          |
|-------|----------------------------------------------------------------|--------------|----------|
| ## 4  | 79.61672                                                       | 75.63799     | 77.68242 |
| ## 5  | 86.22843                                                       | 58.60758     | 60.14503 |
| ## 6  | 84.87242                                                       | 68.72778     | 83.09420 |
| ## 7  | 86.68026                                                       | 67.59308     | 79.56700 |
| ## 8  | 83.74952                                                       | 76.51237     | 75.31288 |
| ## 9  | 86.74423                                                       | 63.83621     | 69.65782 |
| ## 10 | 92.25443                                                       | 88.80248     | 88.26233 |
| ##    | Texture.isotropy.sd Length.scale.anisotropy..Sfrax...epLsar..n |              |          |
| ## 1  | 11.551649                                                      |              | 9        |
| ## 2  | 2.365707                                                       |              | 3        |
| ## 3  | 19.306849                                                      |              | 9        |
| ## 4  | 5.305107                                                       |              | 3        |
| ## 5  | 23.702520                                                      |              | 9        |
| ## 6  | 26.438298                                                      |              | 3        |
| ## 7  | 24.419322                                                      |              | 8        |
| ## 8  | 6.718207                                                       |              | 3        |
| ## 9  | 20.271386                                                      |              | 9        |
| ## 10 | 3.216065                                                       |              | 3        |
| ##    | Length.scale.anisotropy..Sfrax...epLsar..min                   |              |          |
| ## 1  |                                                                | 0.0003036412 |          |
| ## 2  |                                                                | 0.0004903408 |          |
| ## 3  |                                                                | 0.0002322810 |          |
| ## 4  |                                                                | 0.0006145745 |          |
| ## 5  |                                                                | 0.0005041829 |          |
| ## 6  |                                                                | 0.0002173764 |          |
| ## 7  |                                                                | 0.0007216012 |          |
| ## 8  |                                                                | 0.0013732855 |          |
| ## 9  |                                                                | 0.0006712386 |          |
| ## 10 |                                                                | 0.0004264319 |          |
| ##    | Length.scale.anisotropy..Sfrax...epLsar..max                   |              |          |
| ## 1  |                                                                | 0.001792291  |          |
| ## 2  |                                                                | 0.001118900  |          |
| ## 3  |                                                                | 0.006755924  |          |
| ## 4  |                                                                | 0.003863928  |          |
| ## 5  |                                                                | 0.005463414  |          |
| ## 6  |                                                                | 0.003835056  |          |
| ## 7  |                                                                | 0.004121158  |          |
| ## 8  |                                                                | 0.003495790  |          |
| ## 9  |                                                                | 0.003949583  |          |
| ## 10 |                                                                | 0.002831267  |          |
| ##    | Length.scale.anisotropy..Sfrax...epLsar..mean                  |              |          |
| ## 1  |                                                                | 0.0010222791 |          |
| ## 2  |                                                                | 0.0008424768 |          |
| ## 3  |                                                                | 0.0031057825 |          |
| ## 4  |                                                                | 0.0021953597 |          |
| ## 5  |                                                                | 0.0026060333 |          |
| ## 6  |                                                                | 0.0014276674 |          |
| ## 7  |                                                                | 0.0024981068 |          |
| ## 8  |                                                                | 0.0021015144 |          |
| ## 9  |                                                                | 0.0015971049 |          |
| ## 10 |                                                                | 0.0018796506 |          |
| ##    | Length.scale.anisotropy..Sfrax...epLsar..median                |              |          |
| ## 1  |                                                                | 0.0009220201 |          |
| ## 2  |                                                                | 0.0009181891 |          |

```

## 3 0.0022652921
## 4 0.0021075769
## 5 0.0026682883
## 6 0.0002305694
## 7 0.0027324841
## 8 0.0014354676
## 9 0.0014998304
## 10 0.0023812526
## Length.scale.anisotropy..Sfrax...epLsar..sd
## 1 0.0005312633
## 2 0.0003210468
## 3 0.0022981164
## 4 0.0016264542
## 5 0.0014524109
## 6 0.0020848704
## 7 0.0011636999
## 8 0.0012078783
## 9 0.0010293285
## 10 0.0012784803
## Length.scale.anisotropy..NewEplsar..n
## 1 9
## 2 3
## 3 9
## 4 3
## 5 9
## 6 3
## 7 8
## 8 3
## 9 9
## 10 3
## Length.scale.anisotropy..NewEplsar..min
## 1 0.01768289
## 2 0.01778222
## 3 0.01755183
## 4 0.01756227
## 5 0.01713069
## 6 0.01746231
## 7 0.01687653
## 8 0.01719091
## 9 0.01701070
## 10 0.01777294
## Length.scale.anisotropy..NewEplsar..max
## 1 0.01834995
## 2 0.01815137
## 3 0.01910737
## 4 0.01805707
## 5 0.01795282
## 6 0.01772013
## 7 0.01777504
## 8 0.01749688
## 9 0.01801316
## 10 0.01783933
## Length.scale.anisotropy..NewEplsar..mean
## 1 0.01803226

```

```

## 2          0.01798564
## 3          0.01811044
## 4          0.01775986
## 5          0.01754005
## 6          0.01759671
## 7          0.01731615
## 8          0.01734158
## 9          0.01744137
## 10         0.01780281
## Length.scale.anisotropy..NewEplsar..median
## 1          0.01807702
## 2          0.01802332
## 3          0.01811201
## 4          0.01766025
## 5          0.01756788
## 6          0.01760767
## 7          0.01729995
## 8          0.01733696
## 9          0.01746496
## 10         0.01779615
## Length.scale.anisotropy..NewEplsar..sd Fractal.complexity..Asfc..n
## 1          1.930067e-04          9
## 2          1.874365e-04          3
## 3          5.325728e-04          9
## 4          2.620097e-04          3
## 5          2.960458e-04          9
## 6          1.292601e-04          3
## 7          2.785530e-04          8
## 8          1.530368e-04          3
## 9          2.718568e-04          9
## 10         3.369016e-05          3
## Fractal.complexity..Asfc..min Fractal.complexity..Asfc..max
## 1          17.90917          32.86133
## 2          21.83468          36.96163
## 3          31.53697          144.81210
## 4          42.84526          73.08920
## 5          15.14748          28.65736
## 6          18.86207          30.70305
## 7          12.26438          34.95146
## 8          12.24780          24.30124
## 9          17.52856          55.94547
## 10         27.36583          48.41544
## Fractal.complexity..Asfc..mean Fractal.complexity..Asfc..median
## 1          23.89955          22.93562
## 2          29.17703          28.73478
## 3          76.20627          70.56423
## 4          62.94505          72.90068
## 5          22.18242          21.91921
## 6          26.36417          29.52741
## 7          20.52695          16.77779
## 8          17.64458          16.38469
## 9          39.47646          43.20929
## 10         38.96393          41.11050
## Fractal.complexity..Asfc..sd Scale.of.max.complexity..Smfc..n

```

|       |                                     |                                       |                        |
|-------|-------------------------------------|---------------------------------------|------------------------|
| ## 1  | 4.213738                            | 9                                     |                        |
| ## 2  | 7.573168                            | 3                                     |                        |
| ## 3  | 39.032757                           | 9                                     |                        |
| ## 4  | 17.407177                           | 3                                     |                        |
| ## 5  | 4.584811                            | 9                                     |                        |
| ## 6  | 6.523553                            | 3                                     |                        |
| ## 7  | 9.164681                            | 8                                     |                        |
| ## 8  | 6.124693                            | 3                                     |                        |
| ## 9  | 13.388156                           | 9                                     |                        |
| ## 10 | 10.687724                           | 3                                     |                        |
| ##    | Scale.of.max.complexity..Smfc..min  | Scale.of.max.complexity..Smfc..max    |                        |
| ## 1  | 19.521476                           | 46.25603                              |                        |
| ## 2  | 14.265081                           | 39.54113                              |                        |
| ## 3  | 415.754830                          | 9576.82518                            |                        |
| ## 4  | 842.119572                          | 2953.43532                            |                        |
| ## 5  | 28.894201                           | 2334.25686                            |                        |
| ## 6  | 21.114085                           | 175.46142                             |                        |
| ## 7  | 5.566202                            | 985.12871                             |                        |
| ## 8  | 15.428860                           | 24.69969                              |                        |
| ## 9  | 24.699688                           | 985.12871                             |                        |
| ## 10 | 162.226585                          | 415.75483                             |                        |
| ##    | Scale.of.max.complexity..Smfc..mean | Scale.of.max.complexity..Smfc..median |                        |
| ## 1  | 30.87067                            | 31.25146                              |                        |
| ## 2  | 29.20241                            | 33.80103                              |                        |
| ## 3  | 3044.12464                          | 2730.66144                            |                        |
| ## 4  | 1833.76154                          | 1705.72973                            |                        |
| ## 5  | 386.50461                           | 118.54510                             |                        |
| ## 6  | 92.22228                            | 80.09134                              |                        |
| ## 7  | 168.05218                           | 28.31882                              |                        |
| ## 8  | 19.88334                            | 19.52148                              |                        |
| ## 9  | 465.86737                           | 486.35851                             |                        |
| ## 10 | 293.92973                           | 303.80777                             |                        |
| ##    | Scale.of.max.complexity..Smfc..sd   | HAsfc9..HAsfc9..n                     | HAsfc9..HAsfc9..min    |
| ## 1  | 7.067708                            | 9                                     | 0.1316330              |
| ## 2  | 13.250666                           | 3                                     | 0.1255464              |
| ## 3  | 2965.415927                         | 9                                     | 0.4455791              |
| ## 4  | 1061.464860                         | 3                                     | 0.5851555              |
| ## 5  | 742.721750                          | 9                                     | 0.2710966              |
| ## 6  | 77.885458                           | 3                                     | 0.2331469              |
| ## 7  | 337.614585                          | 8                                     | 0.2132304              |
| ## 8  | 4.645996                            | 3                                     | 0.2399171              |
| ## 9  | 305.964329                          | 9                                     | 0.1307847              |
| ## 10 | 127.052448                          | 3                                     | 0.4507234              |
| ##    | HAsfc9..HAsfc9..max                 | HAsfc9..HAsfc9..mean                  | HAsfc9..HAsfc9..median |
| ## 1  | 0.2981468                           | 0.1855606                             | 0.1487189              |
| ## 2  | 0.2493303                           | 0.2006154                             | 0.2269694              |
| ## 3  | 13.3993886                          | 2.6339071                             | 1.1790757              |
| ## 4  | 1.6127738                           | 0.9869700                             | 0.7629809              |
| ## 5  | 6.1967259                           | 1.1809769                             | 0.5654418              |
| ## 6  | 0.9208822                           | 0.4626529                             | 0.2339297              |
| ## 7  | 5.2171286                           | 0.9908077                             | 0.3453896              |
| ## 8  | 0.5555807                           | 0.3814661                             | 0.3489006              |
| ## 9  | 1.9469006                           | 0.8496816                             | 0.7590458              |
| ## 10 | 0.7342881                           | 0.6092278                             | 0.6426717              |

```

##      HAsfc9..HAsfc9..sd HAsfc81..HAsfc81..n HAsfc81..HAsfc81..min
## 1          0.06507991          9          0.2502991
## 2          0.06596603          3          0.2922487
## 3          4.12872799          9          -Inf
## 4          0.54920687          3          3.2992331
## 5          1.89658947          9          0.5763855
## 6          0.39683837          3          0.4197154
## 7          1.71734602          8          0.3835358
## 8          0.16033175          3          0.5153154
## 9          0.66391685          9          0.4168093
## 10         0.14471043          3          0.7749490
##      HAsfc81..HAsfc81..max HAsfc81..HAsfc81..mean HAsfc81..HAsfc81..median
## 1          0.4765597          0.3146768          0.2906821
## 2          0.3858270          0.3305777          0.3136574
## 3          29.9869968          -Inf          3.0279886
## 4          7.1479098          5.1953535          5.1389175
## 5          3.8599229          1.5651485          1.0658350
## 6          1.6018539          0.8442619          0.5112164
## 7          13.4263962          2.5956076          0.6508434
## 8          0.6441176          0.5735222          0.5611335
## 9          3.2954504          1.5500254          1.4498423
## 10         1.2744163          1.0568059          1.1210524
##      HAsfc81..HAsfc81..sd
## 1          0.08511859
## 2          0.04903006
## 3          NaN
## 4          1.92495890
## 5          1.19102556
## 6          0.65768710
## 7          4.49255308
## 8          0.06528869
## 9          0.93993842
## 10         0.25585662

```

Plot all paramaters organised by Raw material

```

# Loop for plotting all surface texture parameters

for (i in num.var) {

  cat("[", i, " ] ", names(confocaldata)[i], "\n", sep = "")

  p <- ggplot(
    confocaldata,
    aes(
      x = Raw_material,
      y = .data[[names(confocaldata)[i]]]
    )
  ) +
  # Neutral boxplot (no categorical encoding)
  geom_boxplot(

```

```

colour = "grey30",
fill   = "grey90",
width  = 0.6,
outlier.shape = NA
) +

# Overlay points with SAME encoding as scatter plots
geom_jitter(
  aes(
    colour = Raw_material,
    shape  = Worked_material
  ),
  width  = 0.15,
  size   = 1.5,
  stroke = 1,
  alpha  = 0.85
) +

theme_classic() +
labs(
  x    = "Raw material",
  y    = gsub("\\.", " ", names(confocaldata)[i]),
  colour = "Raw material",
  shape  = "Worked material"
) +

# Colour-blind-safe palette
scale_colour_brewer(palette = "Dark2") +

# Shape mapping (same as scatter plots)
scale_shape_manual(
  values = c(
    bone    = 1, # open circle
    no_use  = 17 # filled triangle
  )
)

file_out <- paste0(
  file_path_sans_ext(info_in[["file"]]),
  "_plot_",
  names(confocaldata)[i],
  ".pdf"
)

print(p)

ggsave(
  filename = file_out,
  plot     = p,
  path     = "analysis/plots",
  device   = "pdf",
  width    = 26,
  height   = 21,

```

```
units = "cm"  
)  
}
```

## [23] Sq

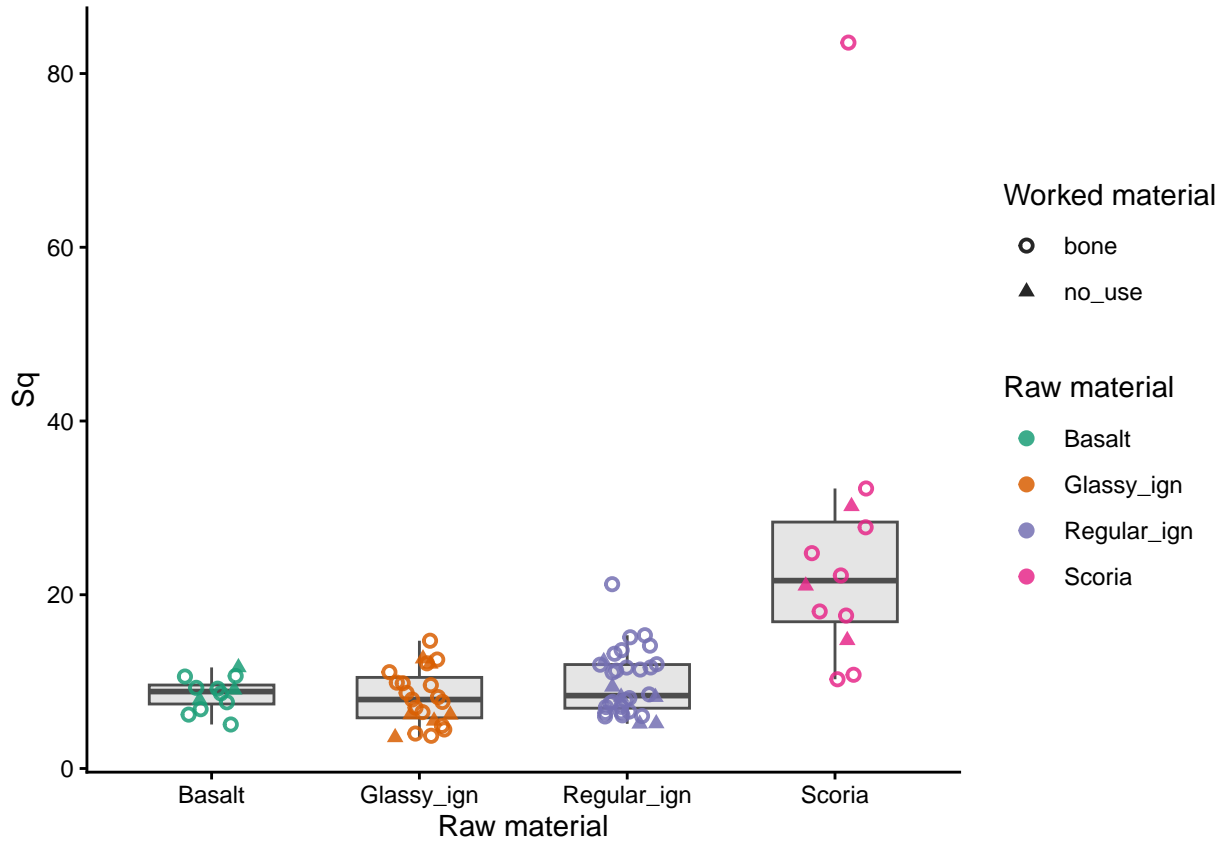

## [24] Ssk

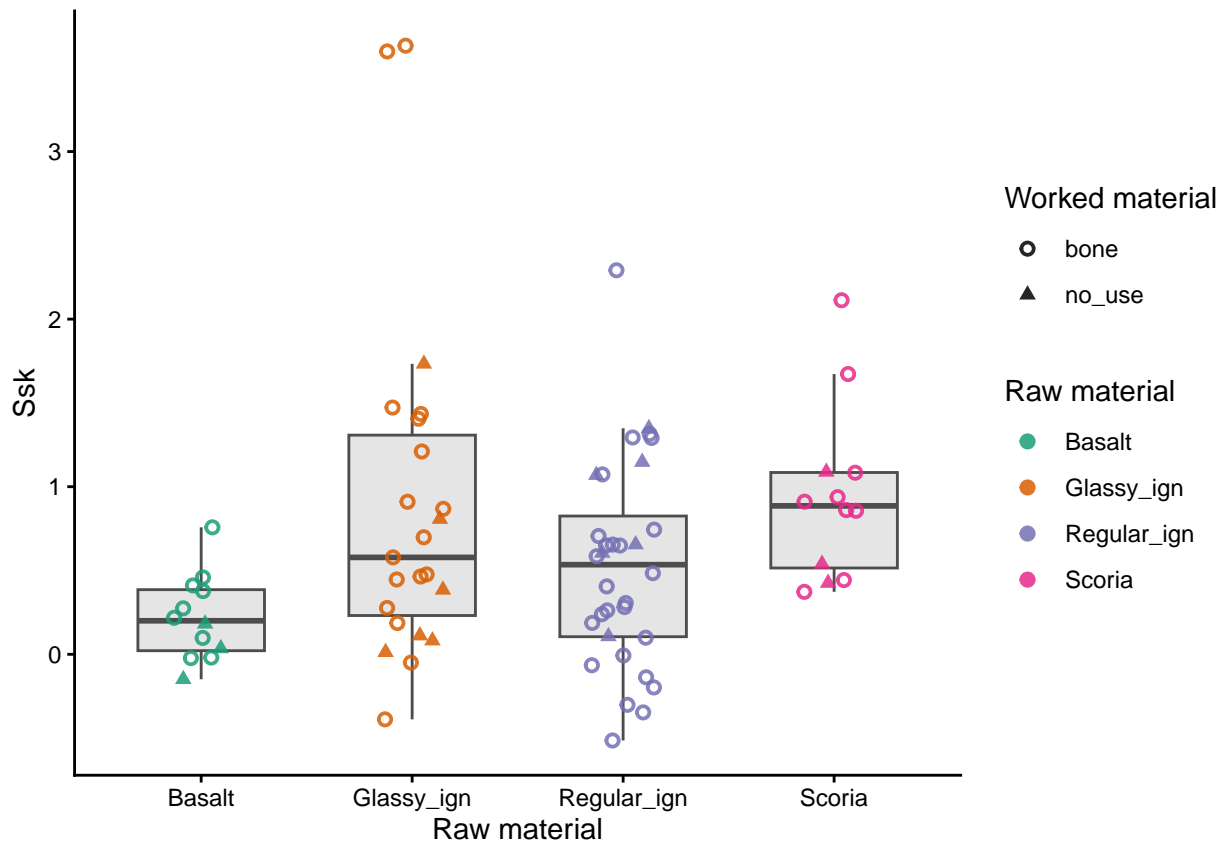

## [25] Sku

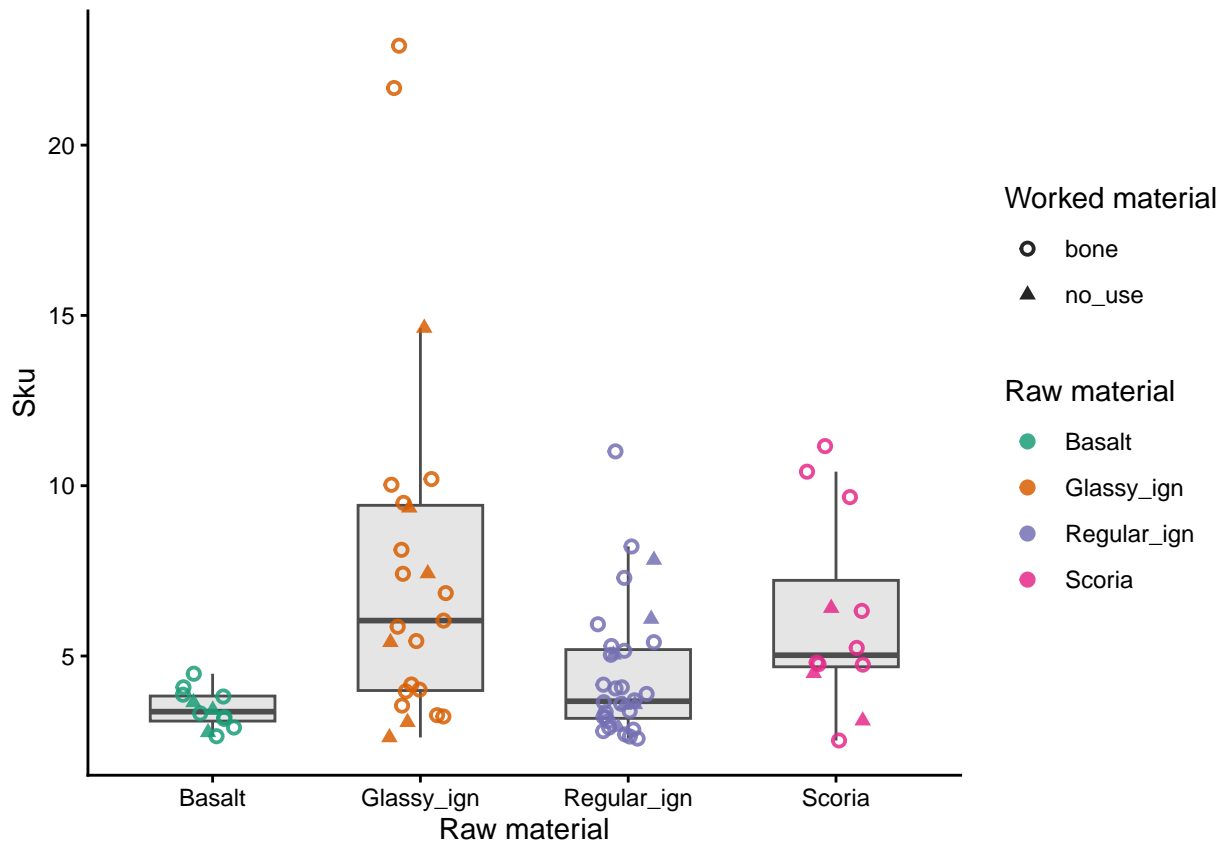

## [26] Sp

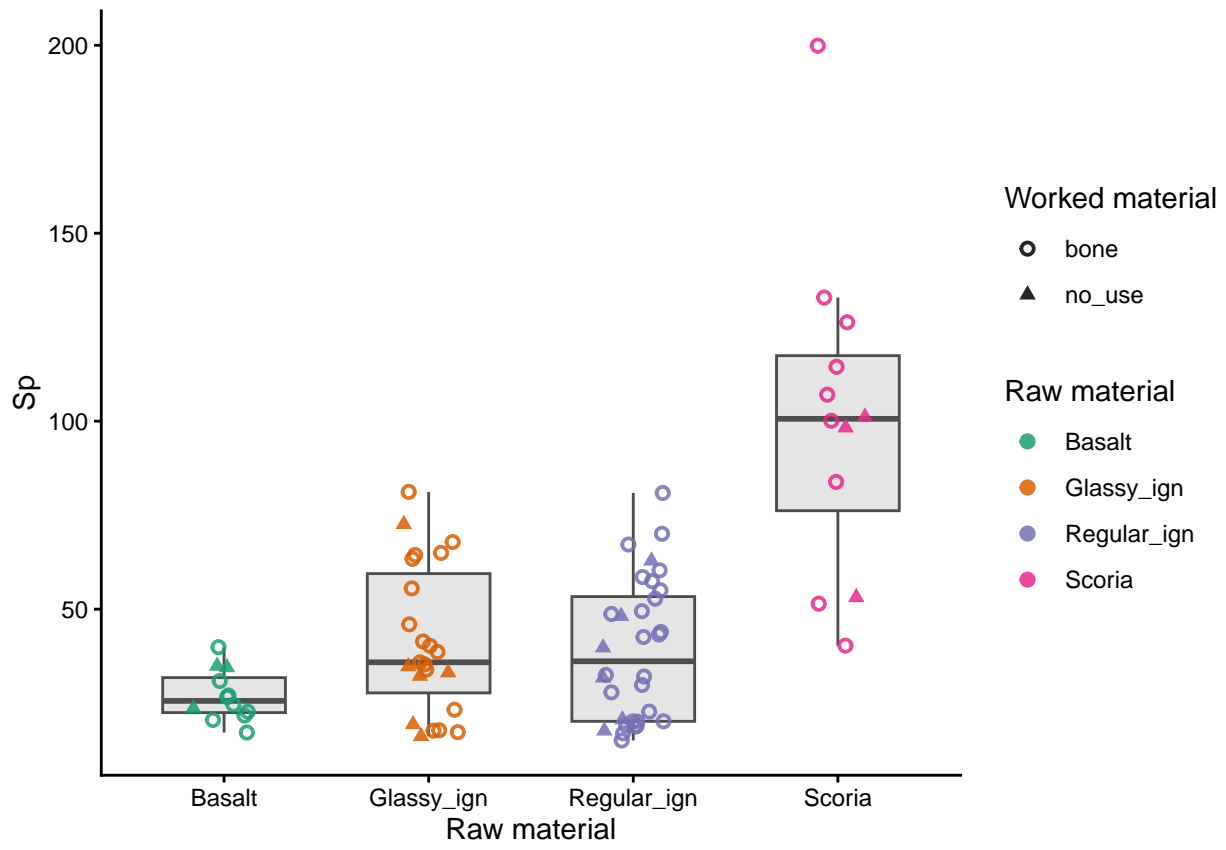

## [27] Sv

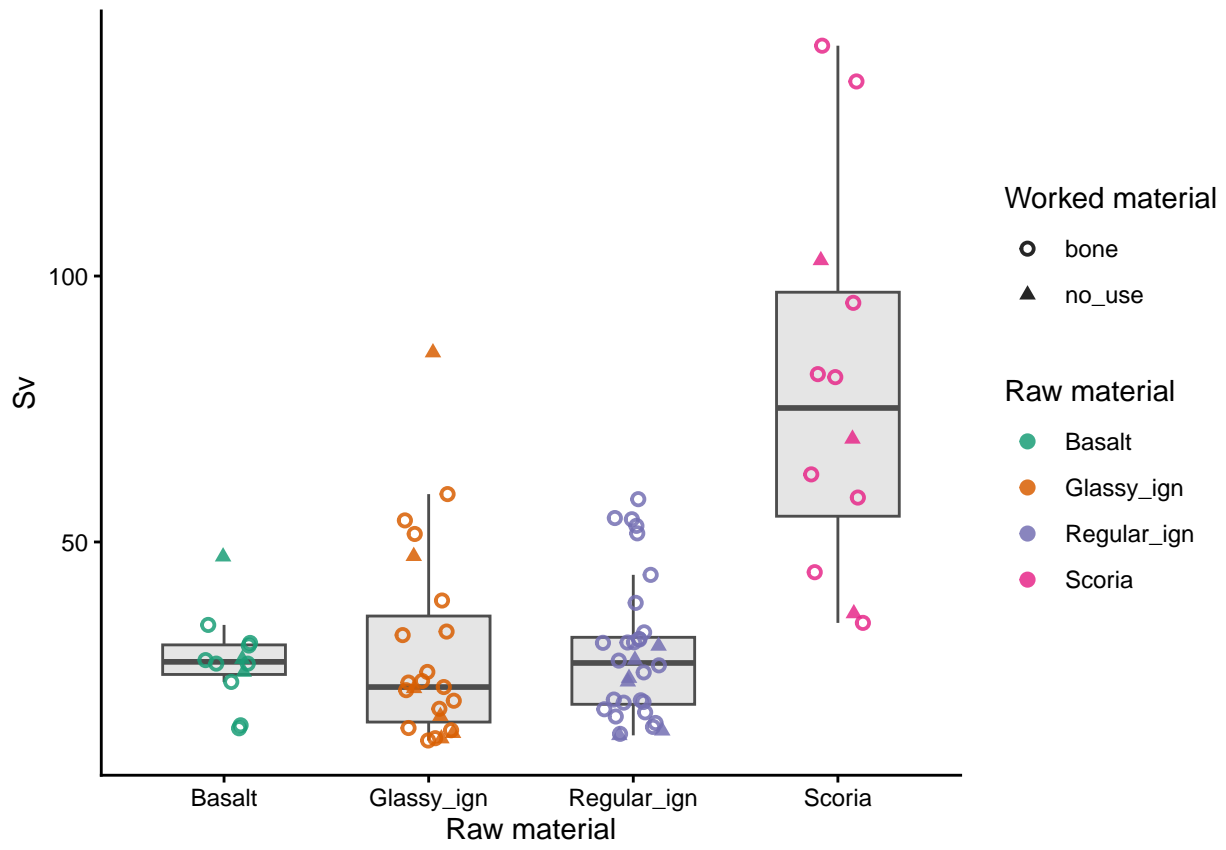

## [28] Sz

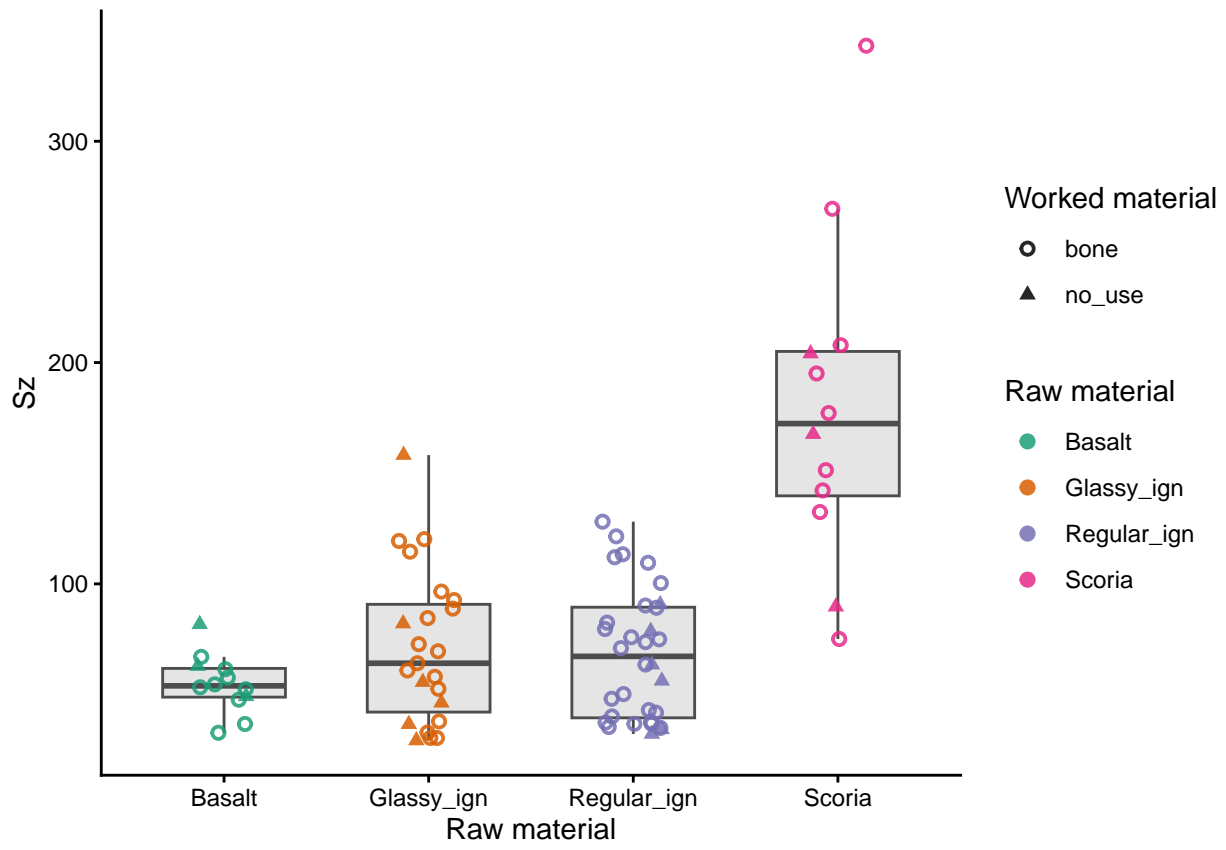

## [29] Sa

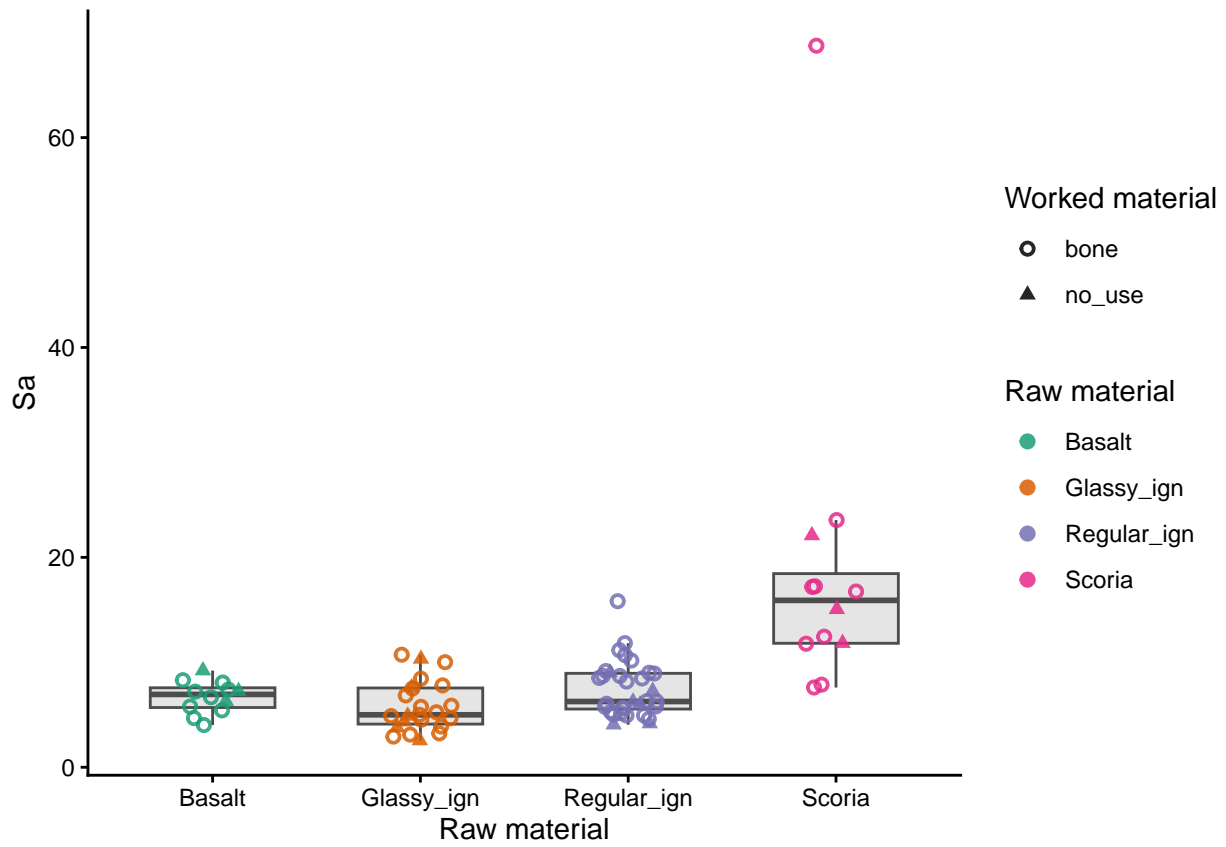

## [30] Smr...c...1.µm.below.highest.peak.

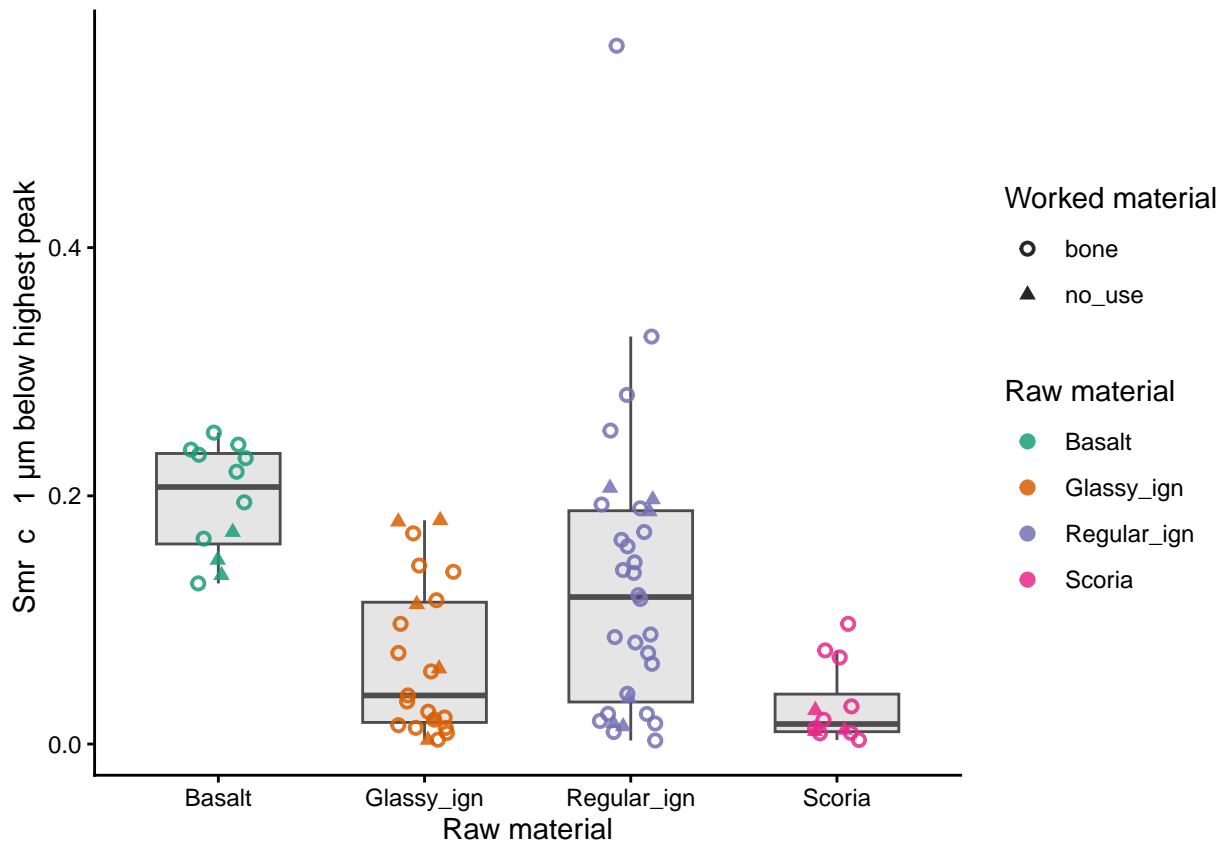

## [31] Smc..p...10..

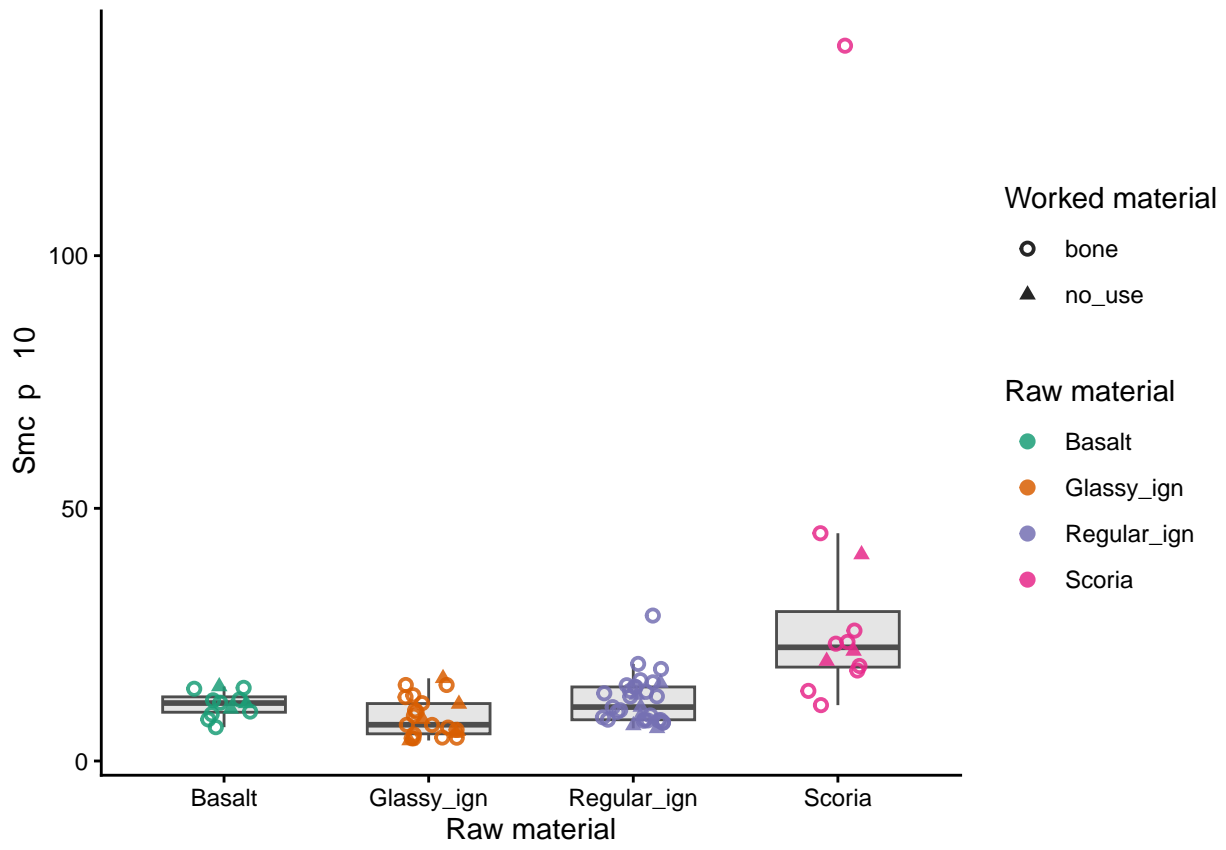

## [32] Sxp...p...50...q...97.5..

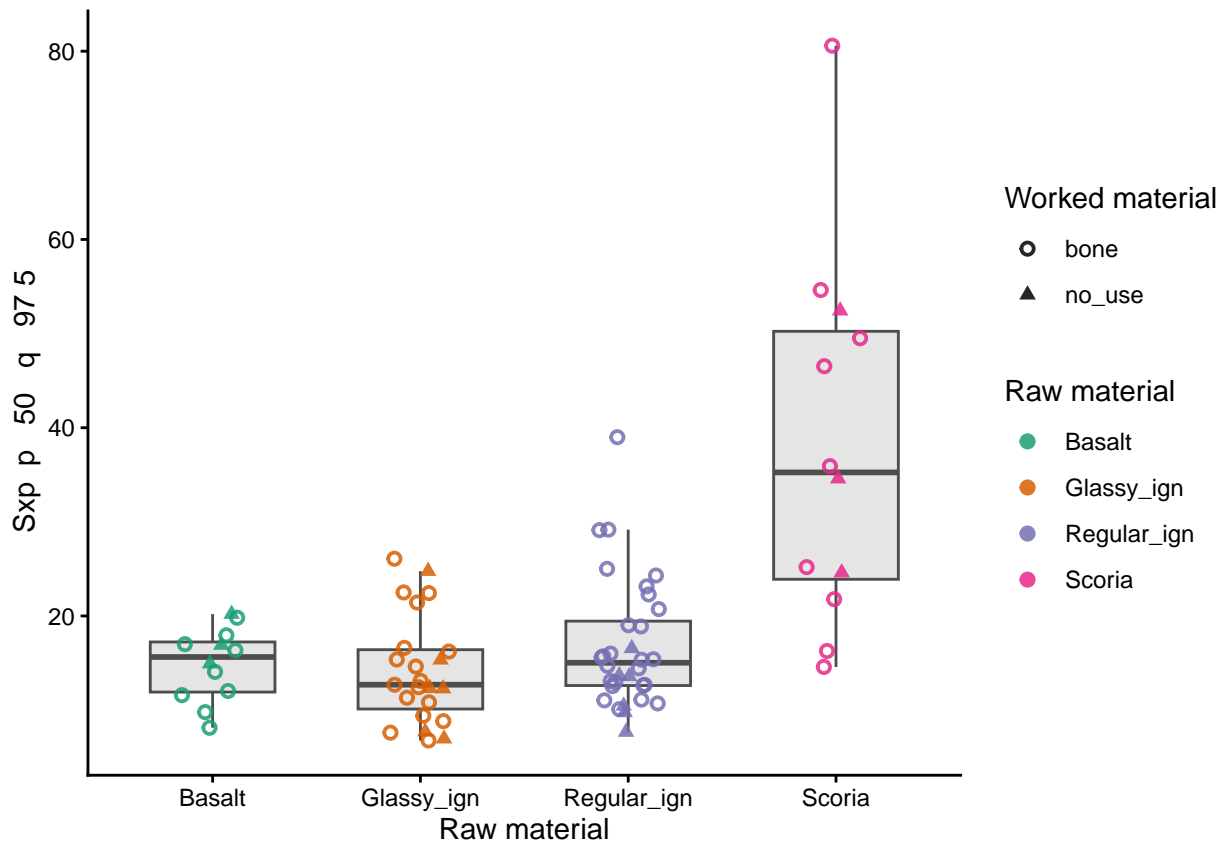

## [33] Sa1...s...0.2.

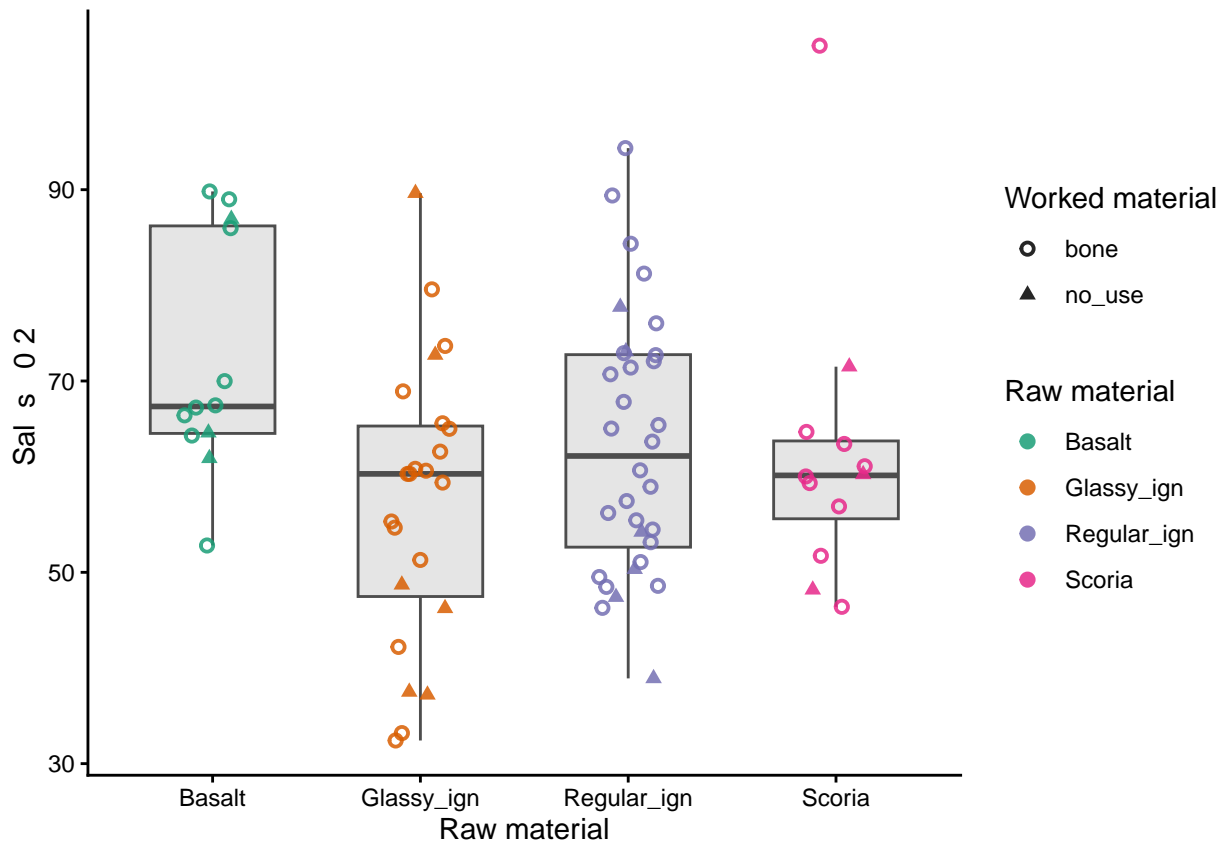

## [34] Str...s...0.2.

Str s 02

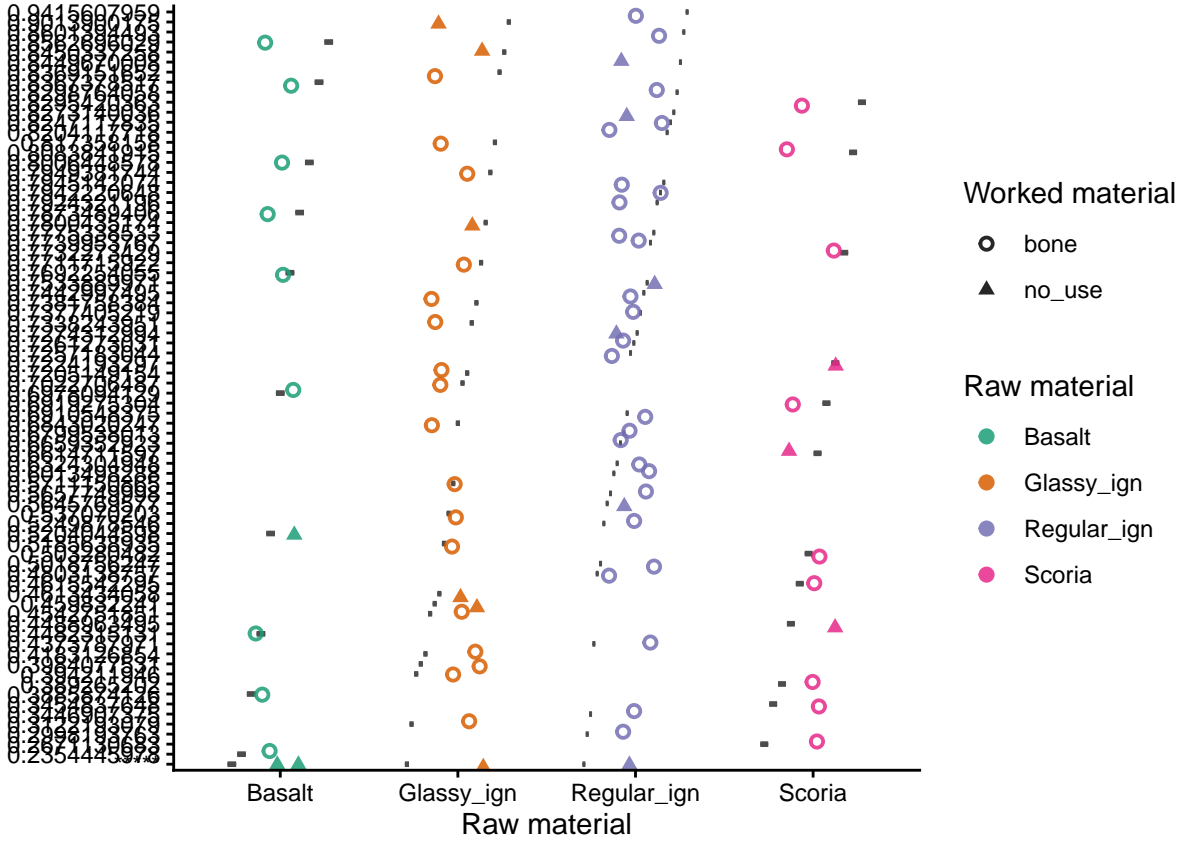

## [35] Std..Reference.angle...0..

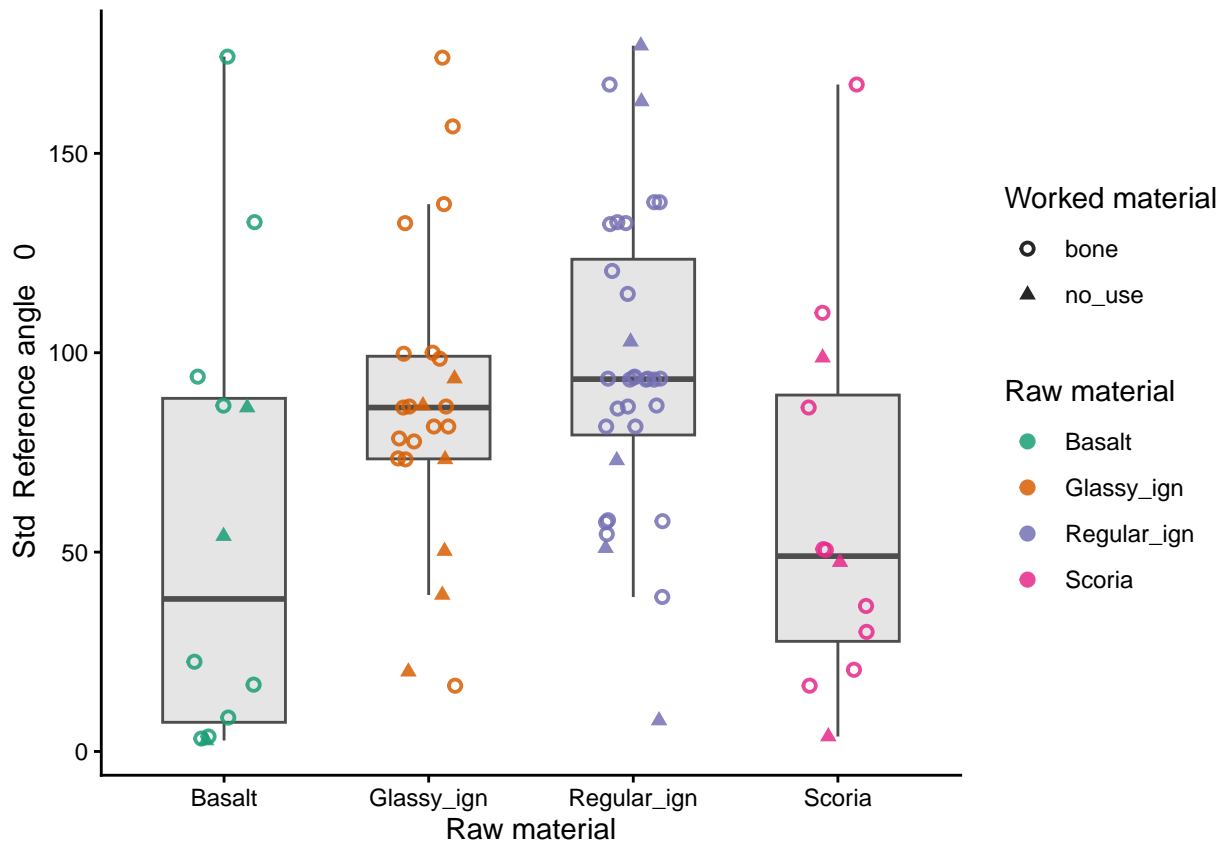

## [36] Sdq

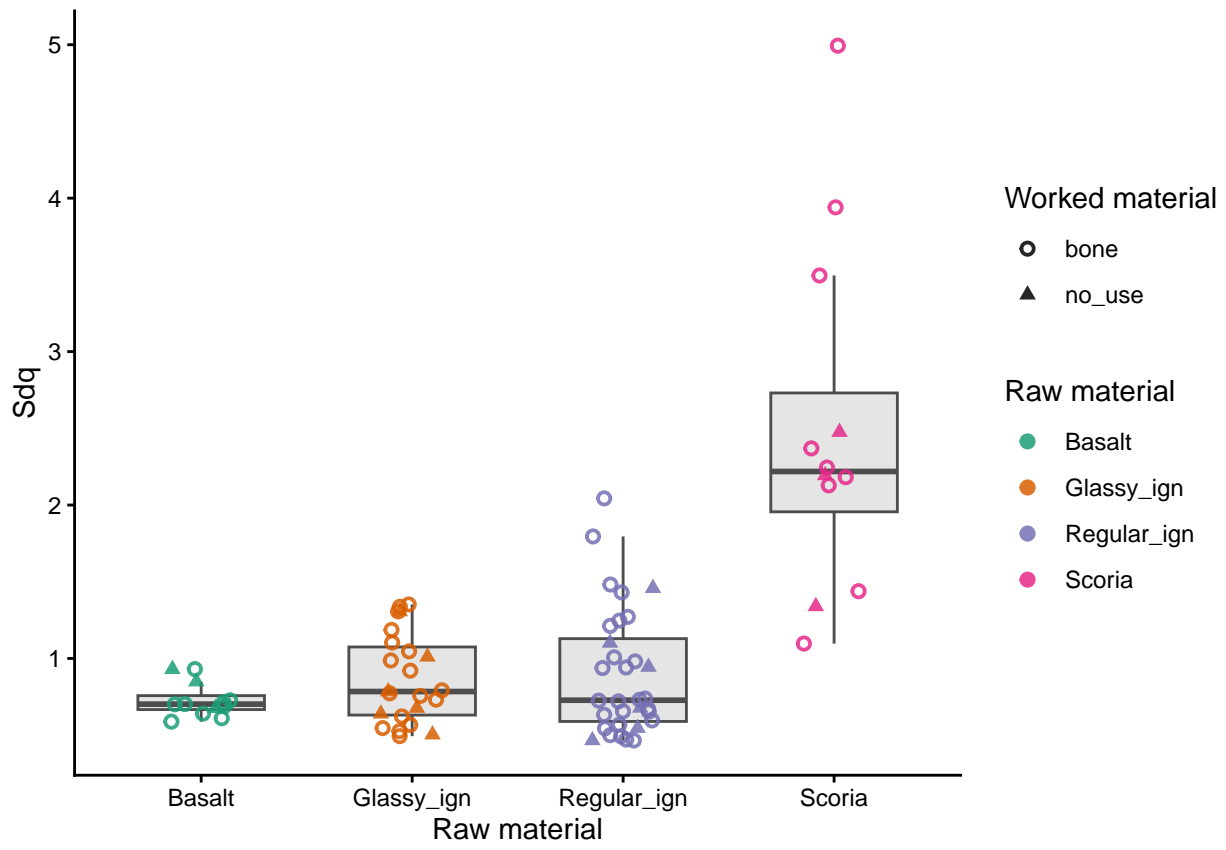

## [37] Sdr

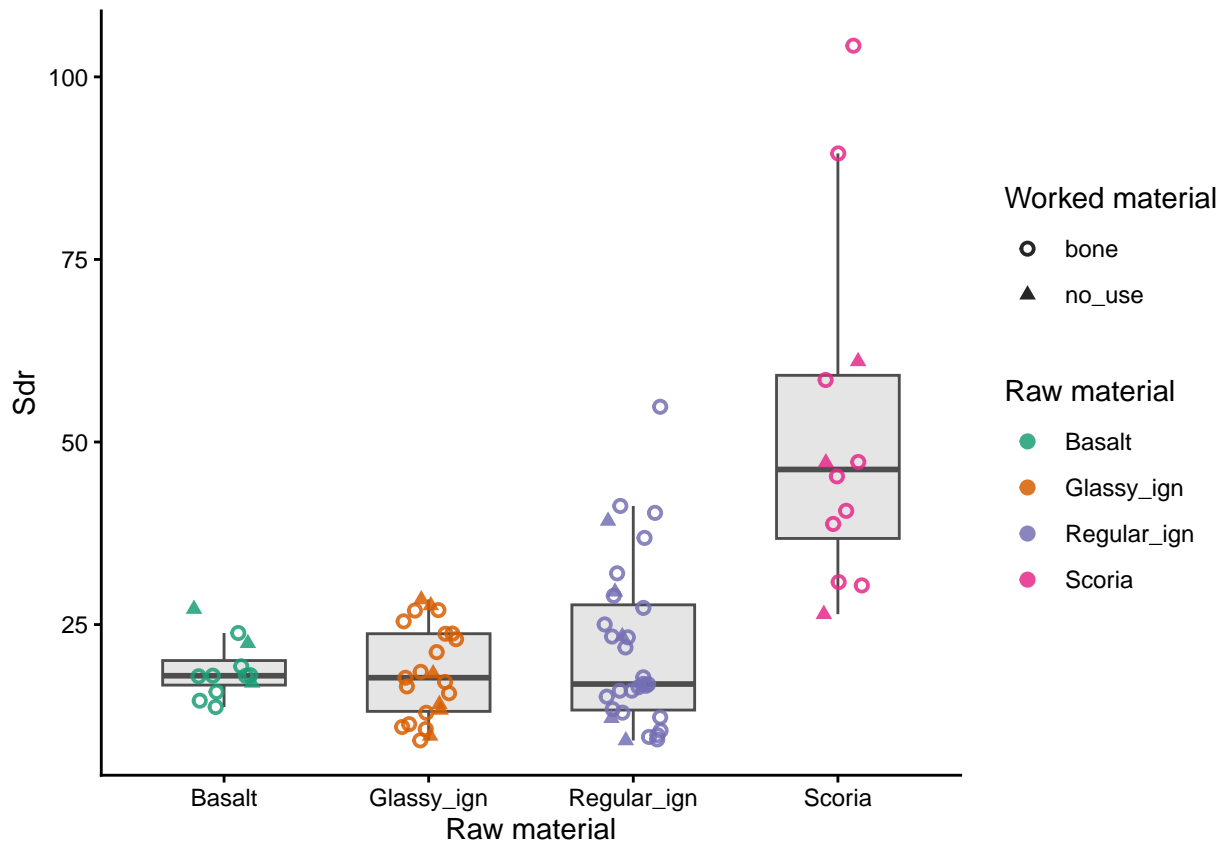

## [38] Vm..p...10..

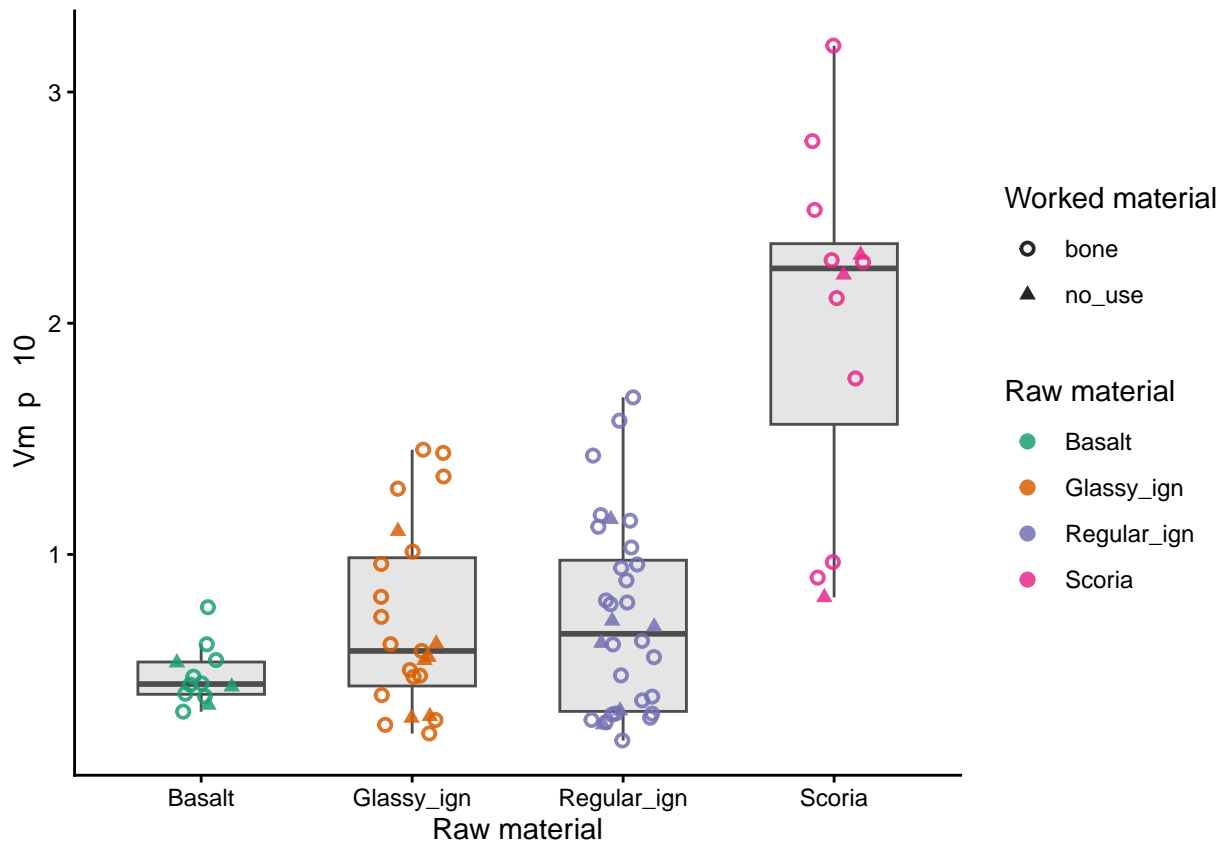

## [39] Vv..p...10..

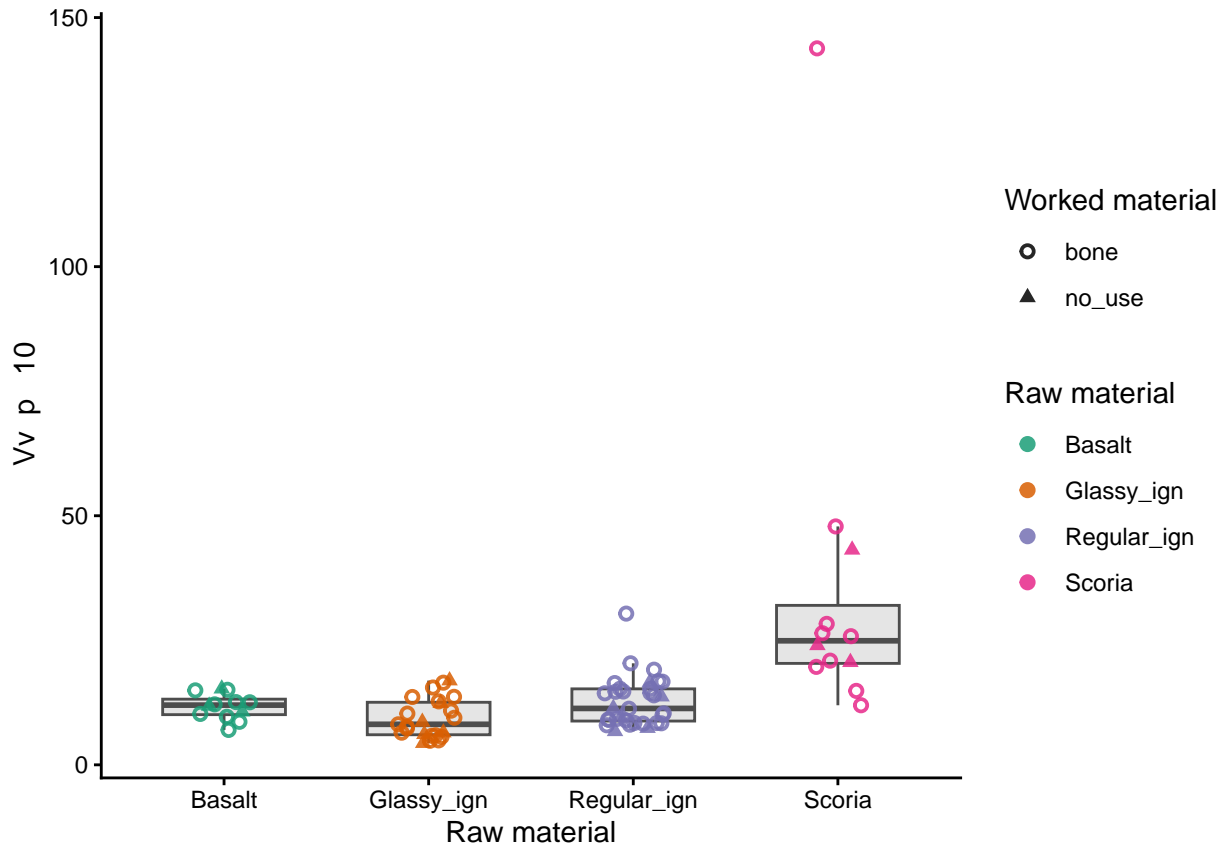

## [40] Vmp..p...10..

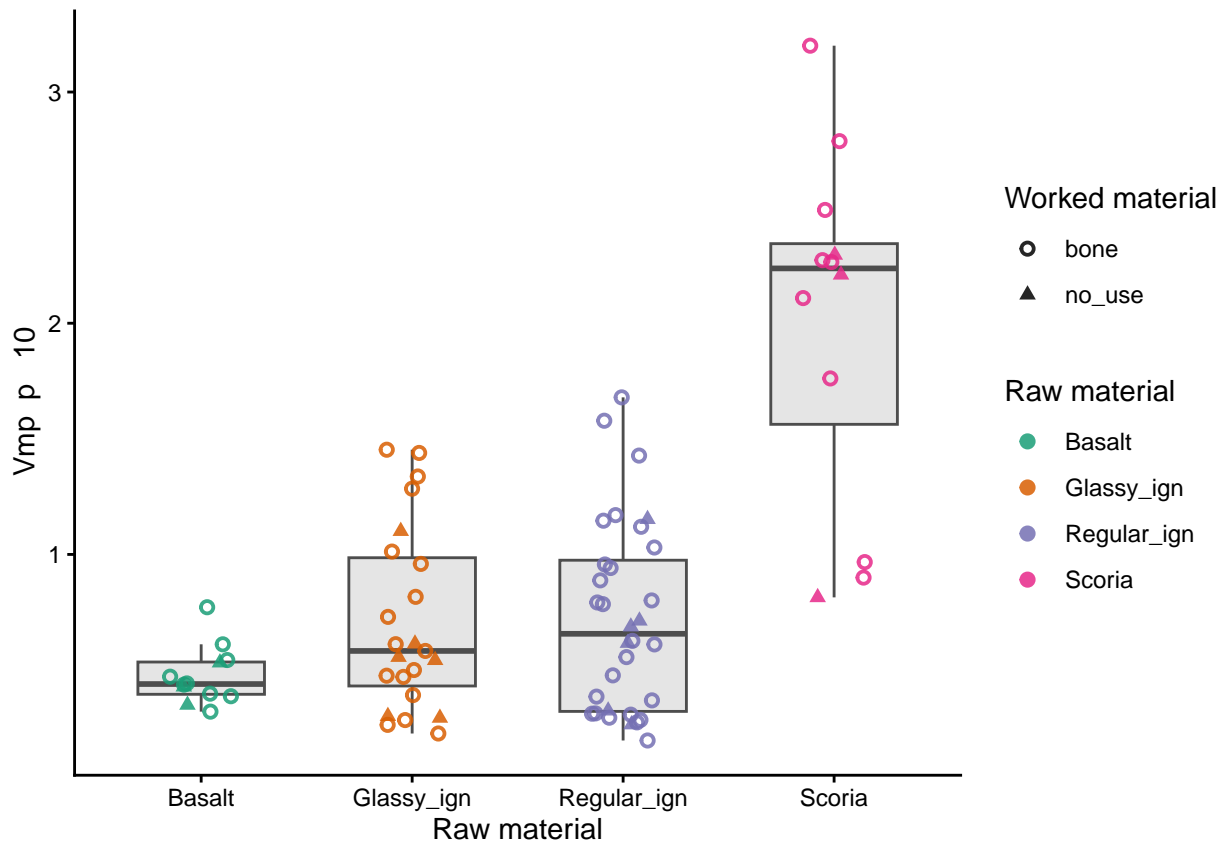

## [41] Vmc..p...10...q...80..

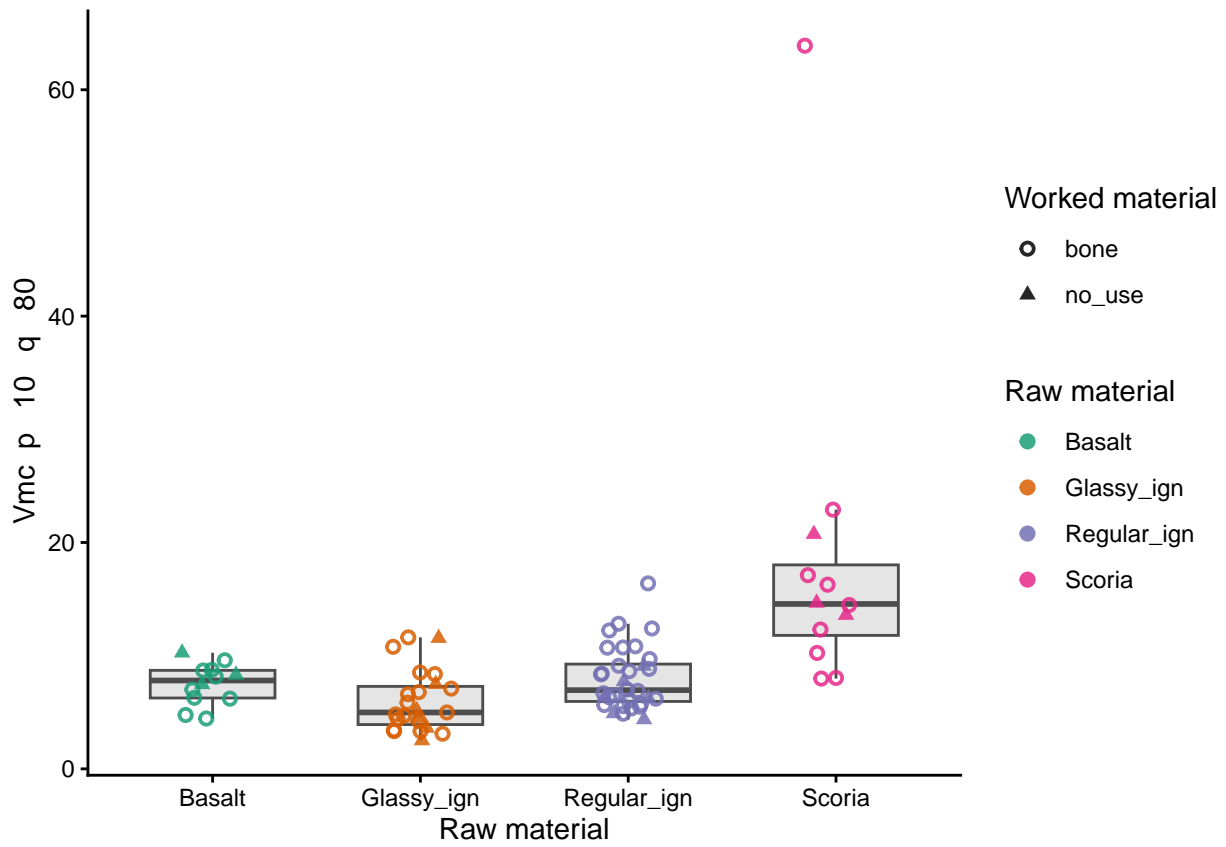

## [42] Vmc..p...10...q...80..

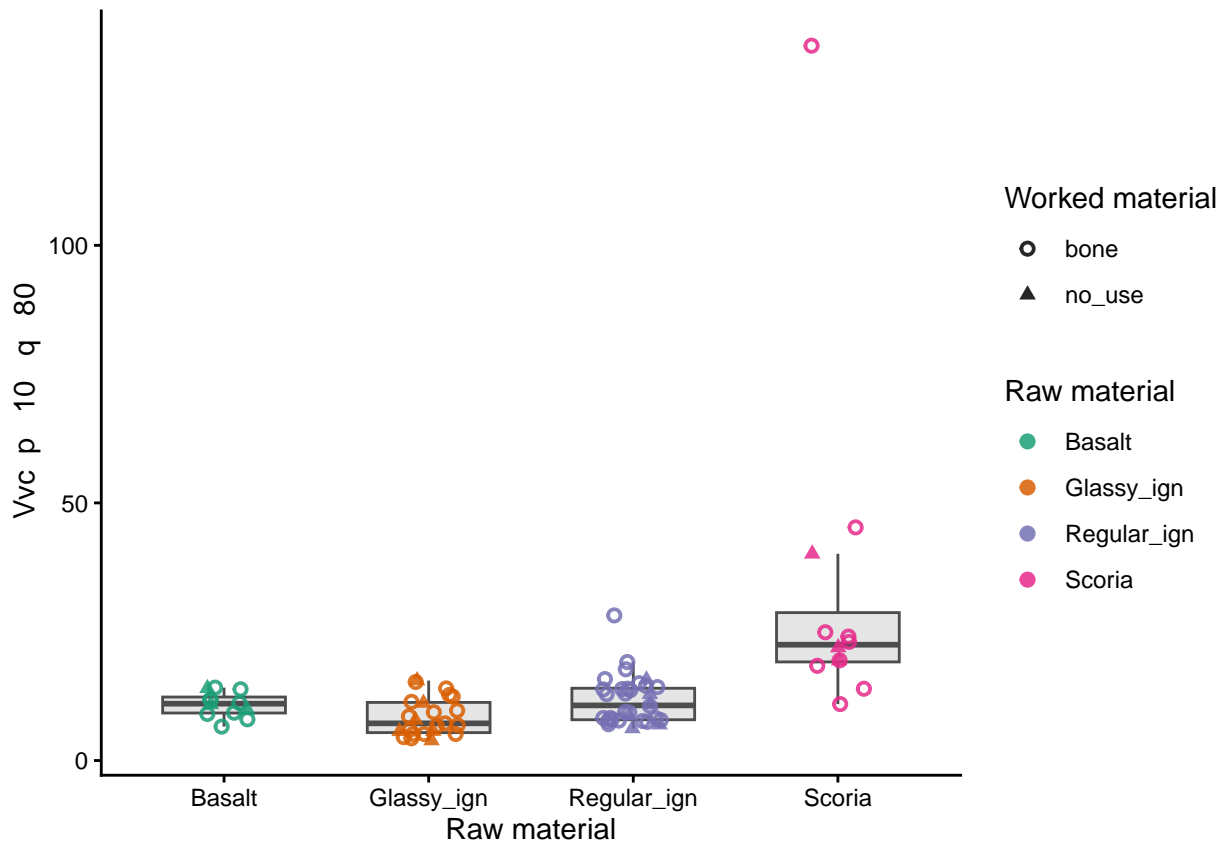

## [43] Vvv...p...80..

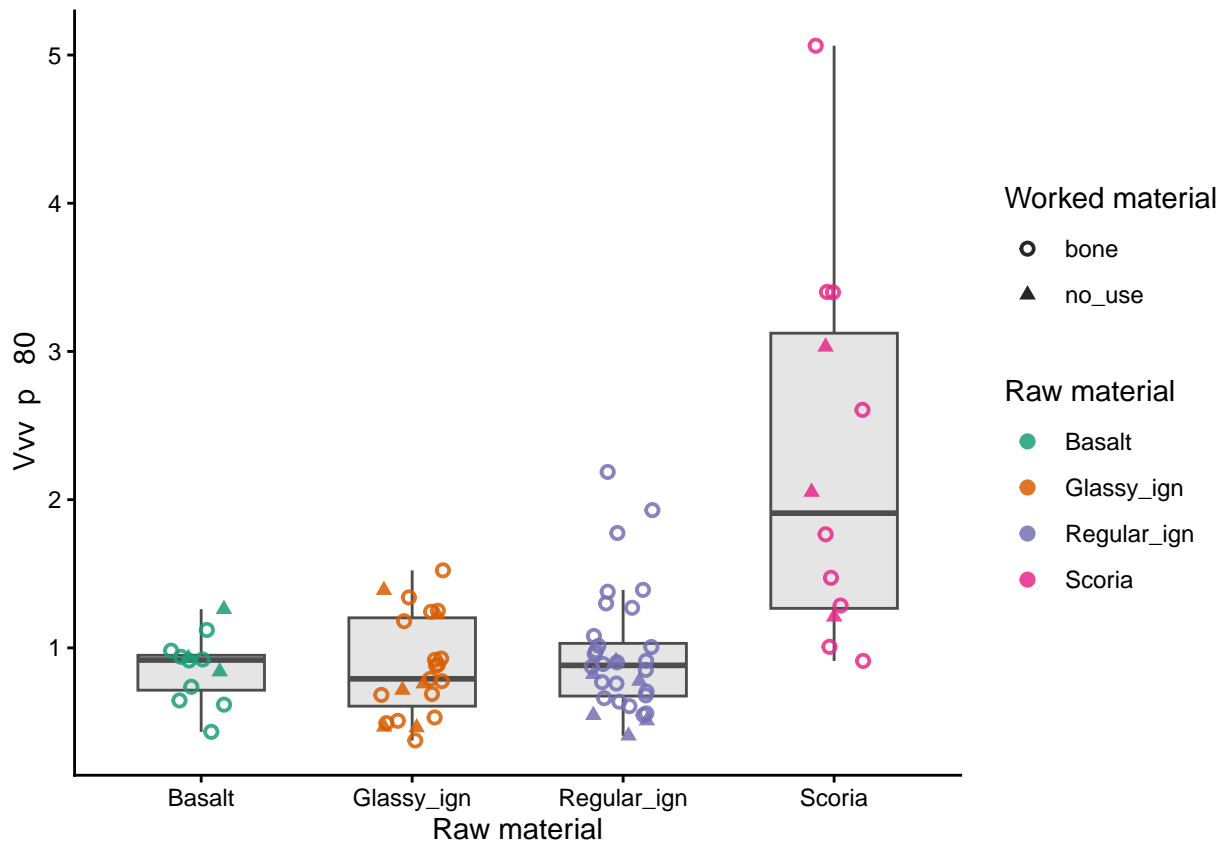

## [44] Maximum.depth.of.furrows

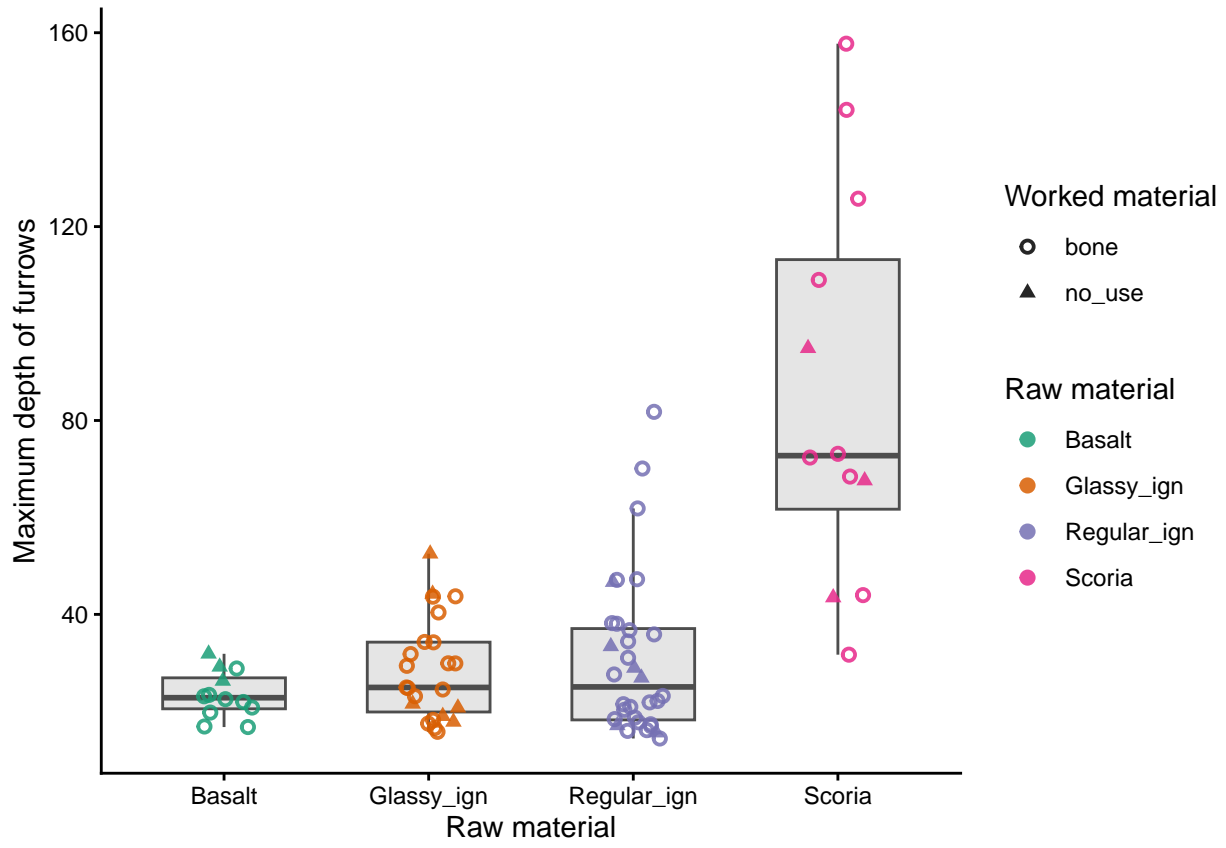

## [45] Mean.depth.of.furrows

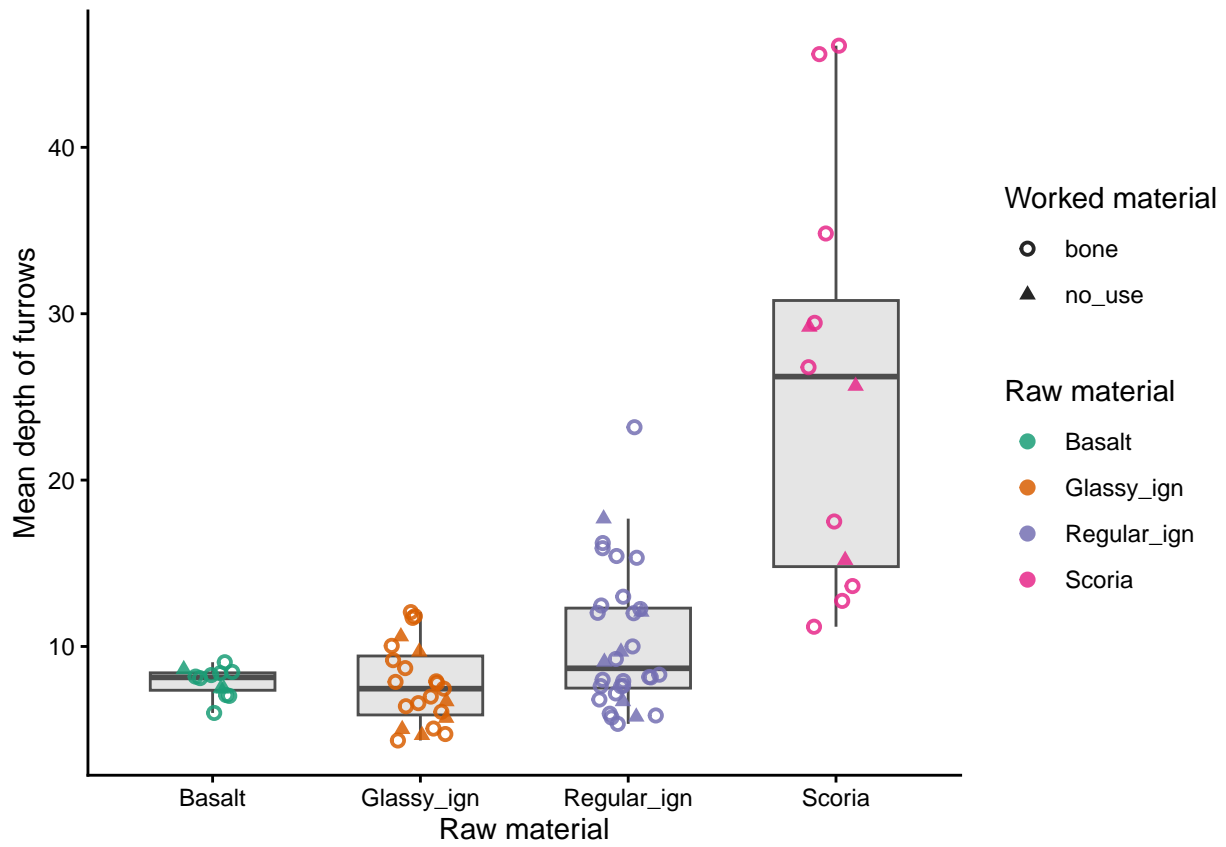

## [46] Mean.density.of.furrows

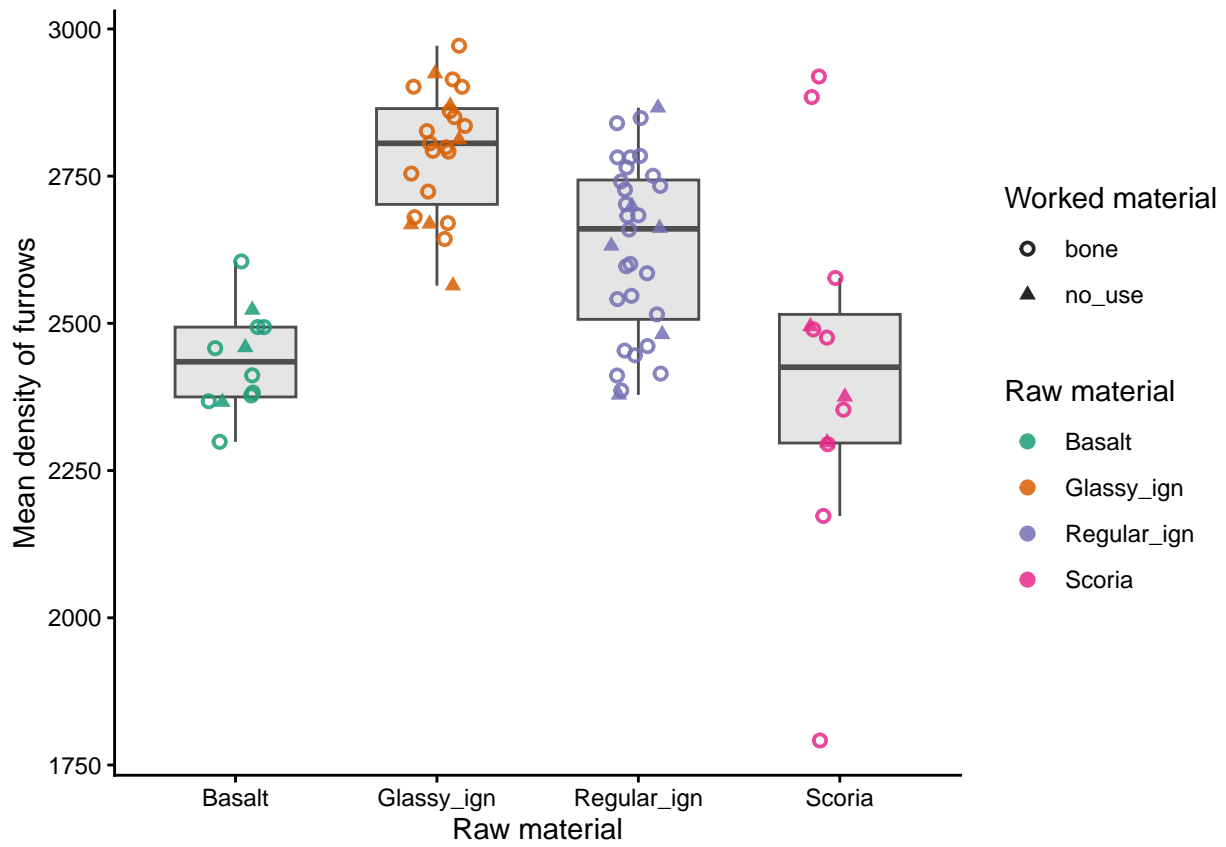

## [47] First.direction

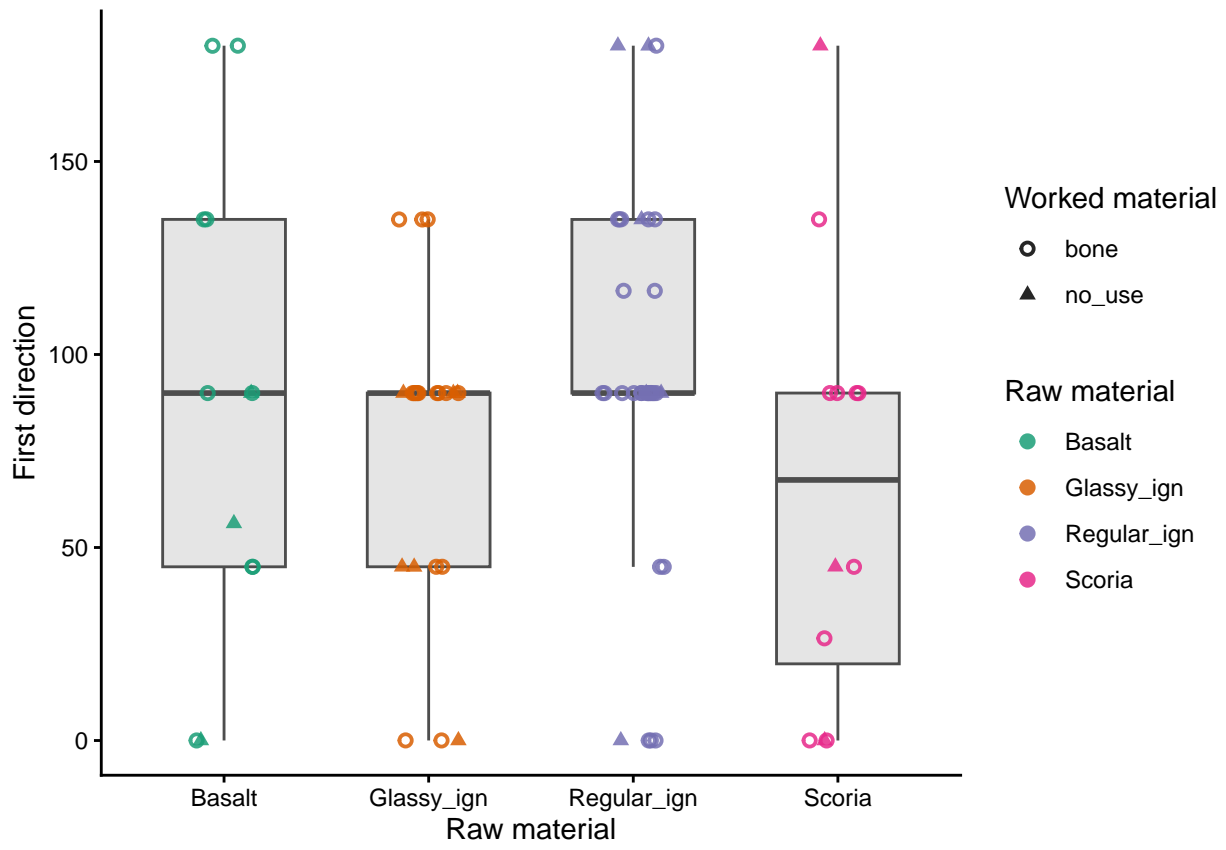

## [48] Second.direction

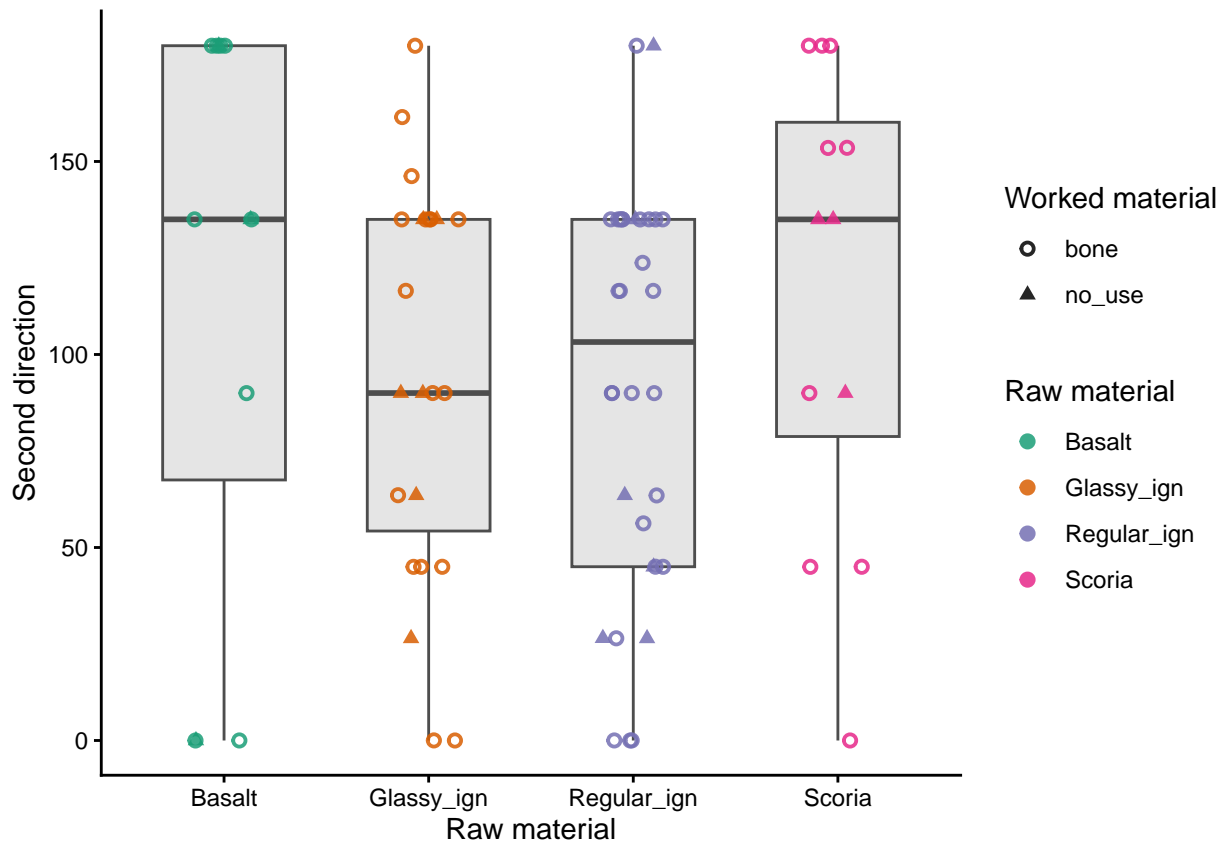

## [49] Third.direction

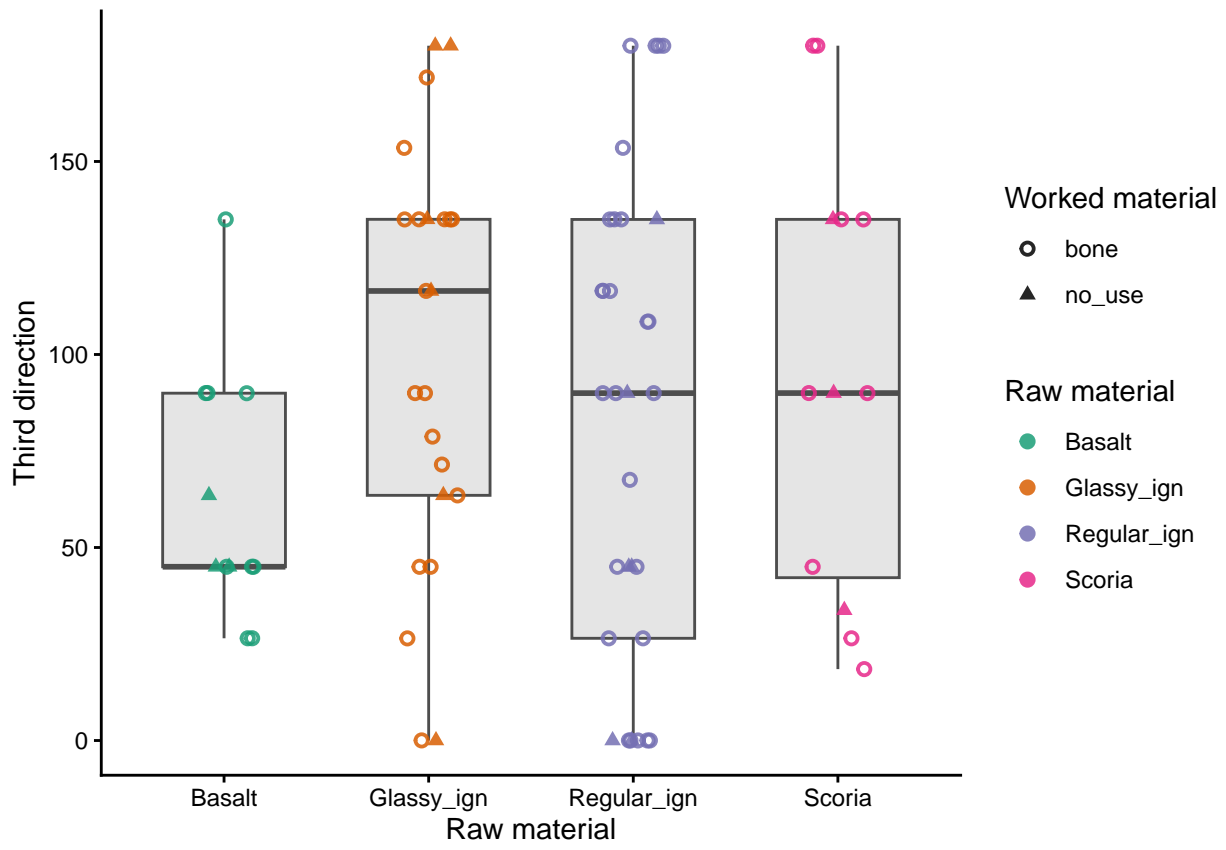

## [50] Texture.isotropy

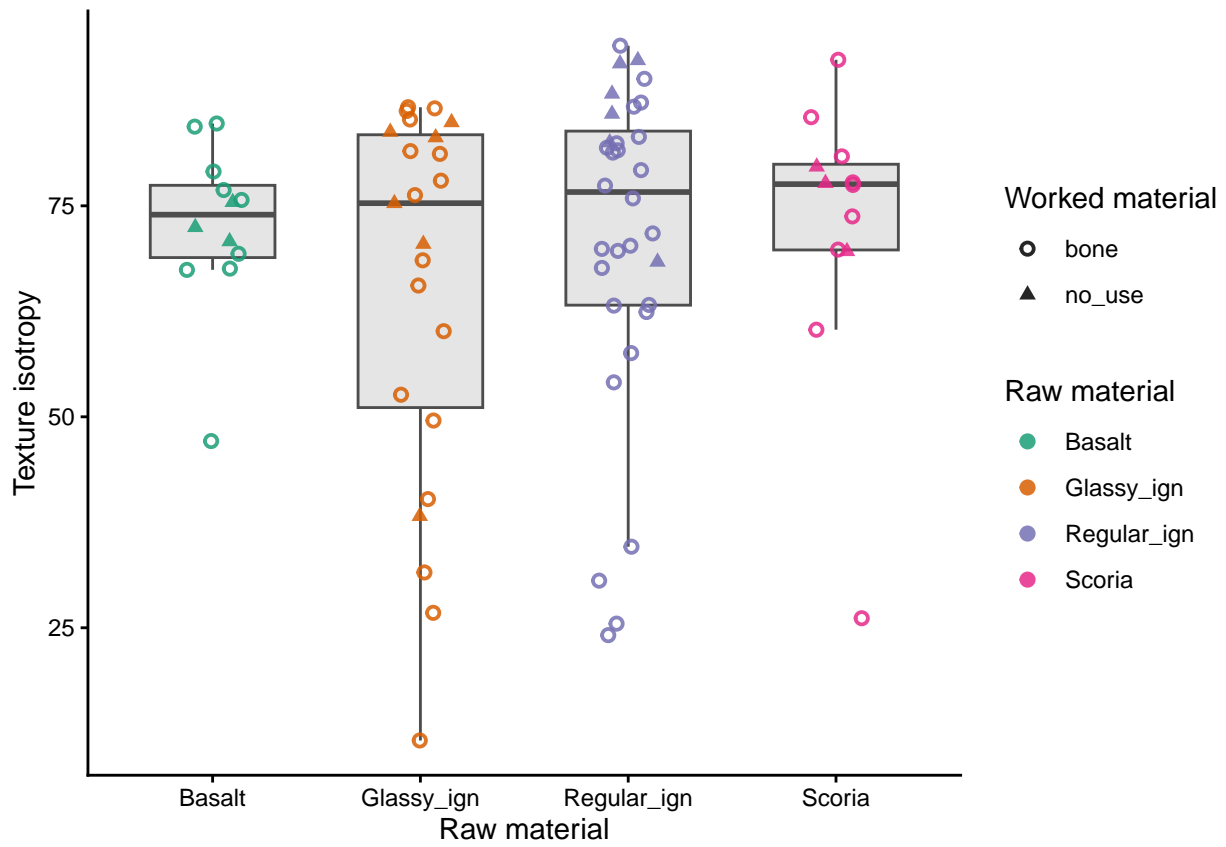

## [51] Length.scale.anisotropy..Sfrax...epLsar.

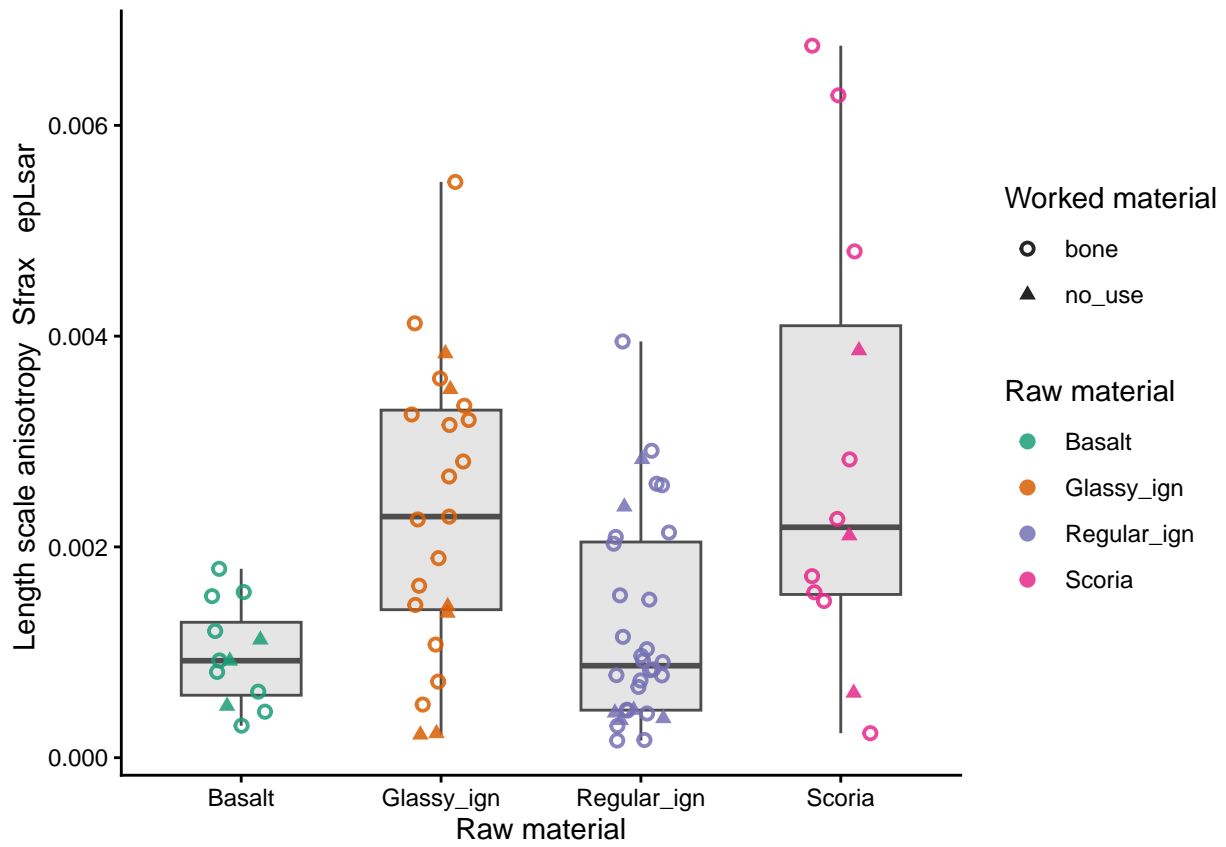

## [52] Length.scale.anisotropy..NewEplsar.

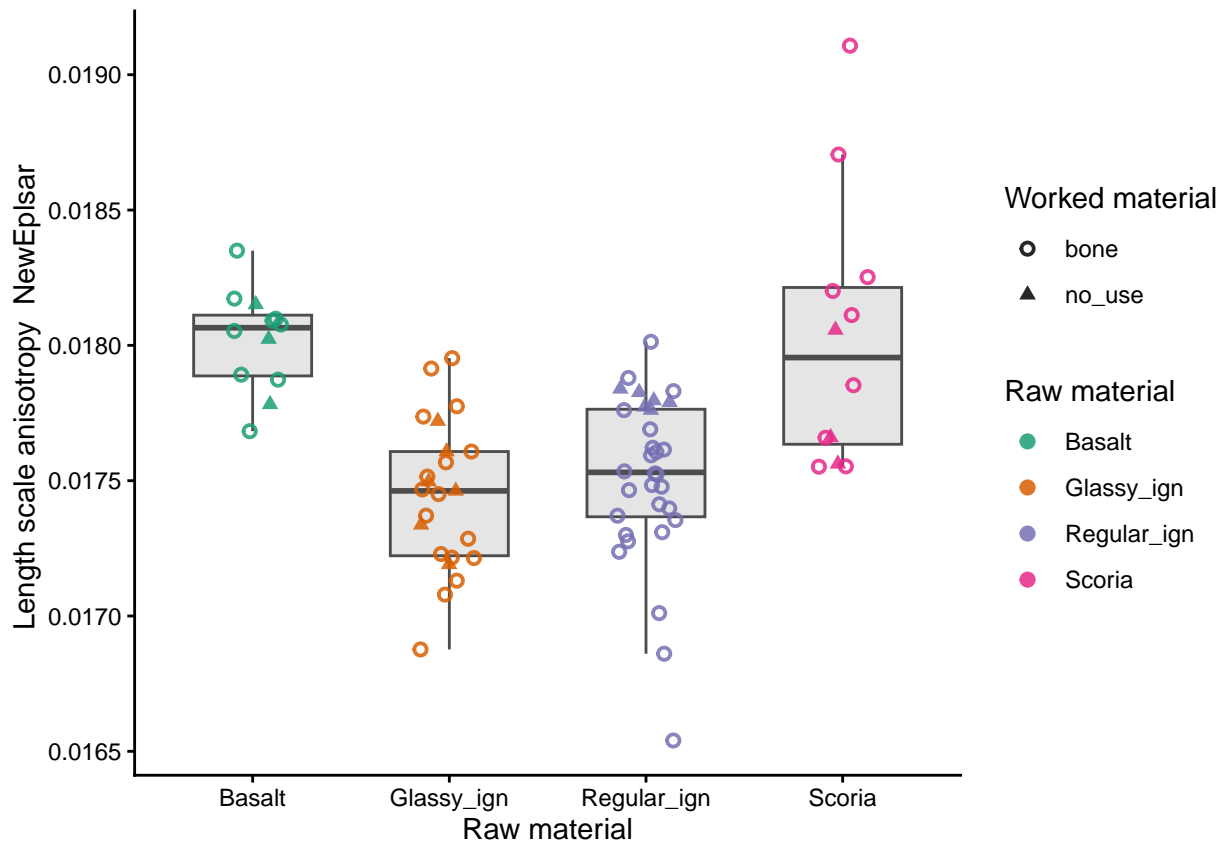

## [53] Fractal.complexity..Asfc.

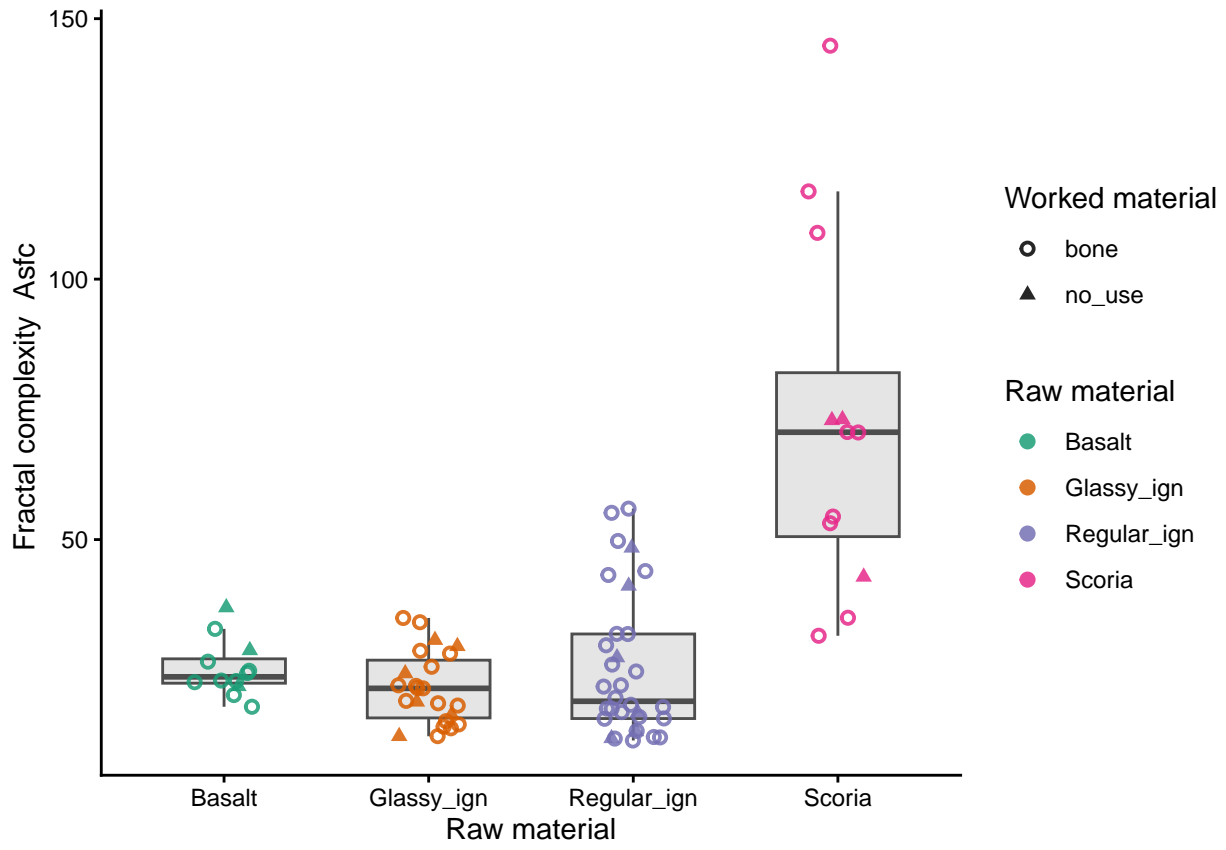

## [54] Scale.of.max.complexity..Smfc.

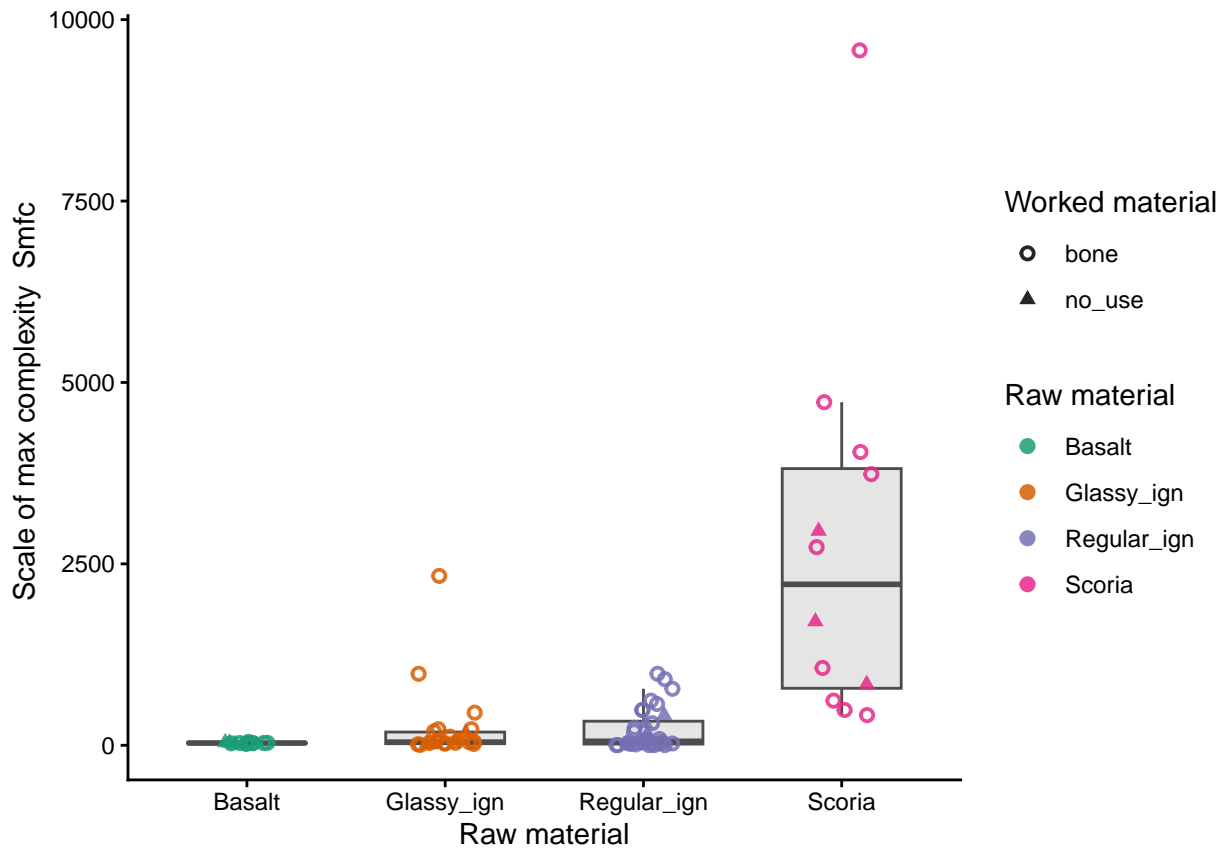

## [55] HAsfc9..HAsfc9.

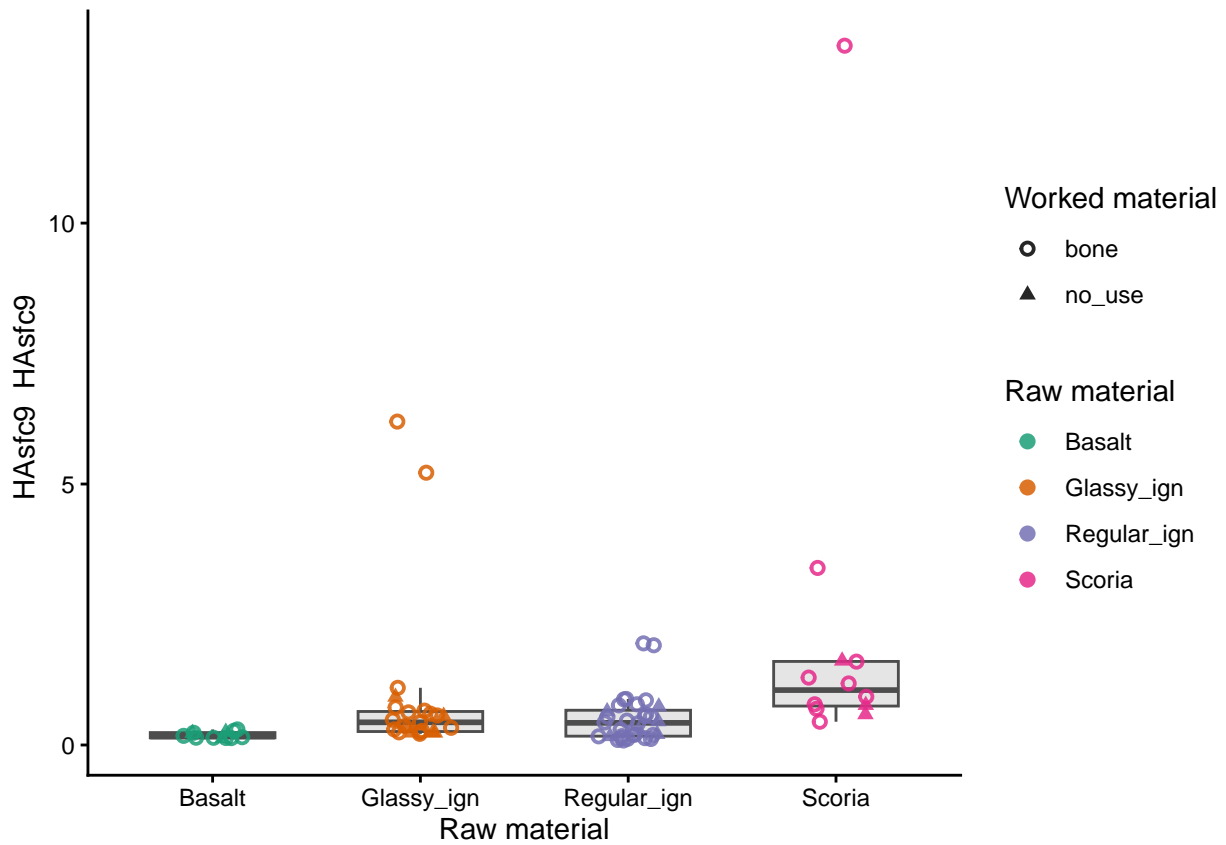

```
## [56] HAsfc81..HAsfc81.
```

```
## Warning: Removed 1 row containing non-finite outside the scale range ('stat_boxplot()').
## Removed 1 row containing non-finite outside the scale range ('stat_boxplot()').
```

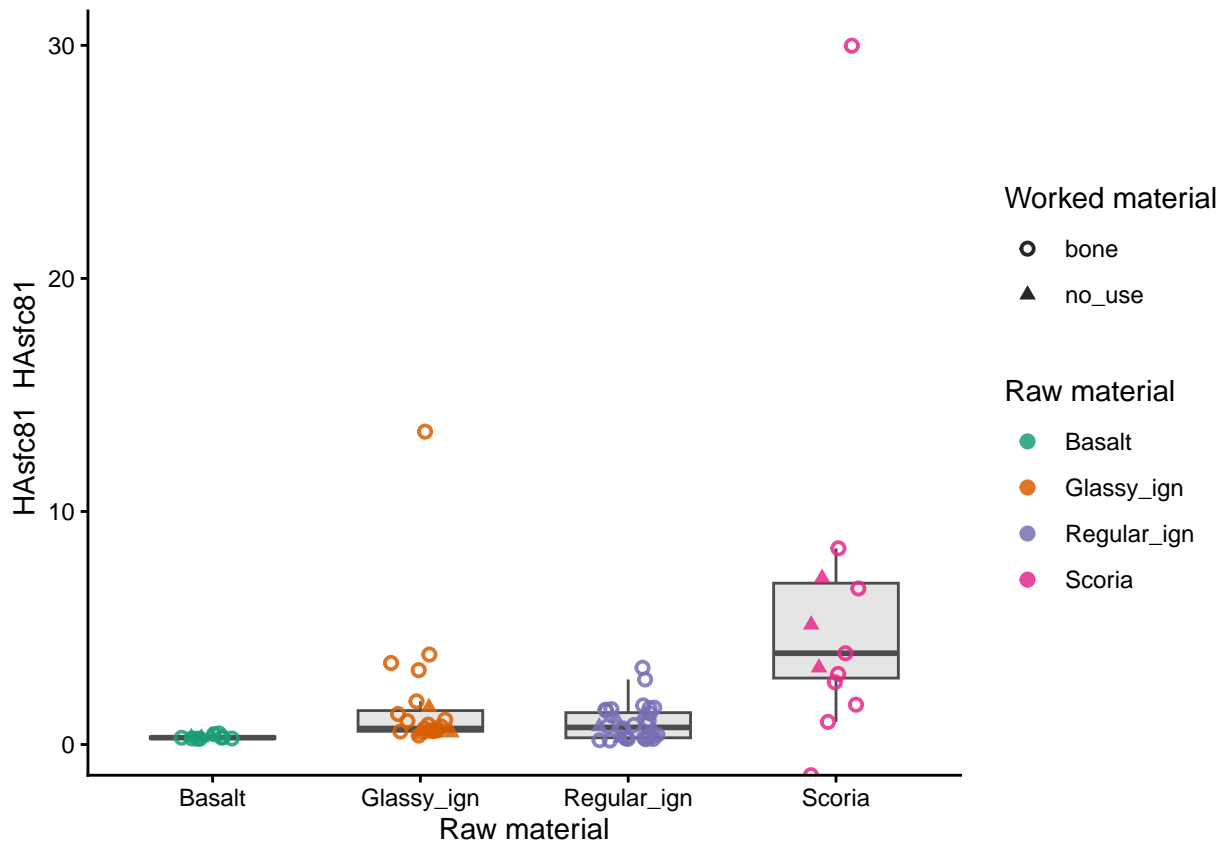

Scatterplots of selected variables combined by “Worked material” and “Motion”

```
# Main parameters
# Sq, Sa → overall roughness
# Vmc → load-bearing core volume
# Asfc / Smfc → complexity (use-wear intensity)
# Furrow depth & density → contact mechanics

# Sa vs. Sq, overall roughness

Sa_Sq <- ggplot(confocaldata) +
  geom_point(
    aes(
      x = Sa,
      y = Sq,
      colour = Raw_material,
      shape = Worked_material
    ),
    size = 1.5,
    stroke = 1.2
  ) +
  coord_cartesian(
    xlim = c(0, 40),
```

```

ylim = c(0, 40)
) +
theme_classic() +
labs(
  x = "Area roughness - Sa (Arithmetical Mean Height)",
  y = "Area roughness - Sq (Arithmetical Mean Height)",
  colour = "Raw material",
  shape = "Worked material"
) +
scale_colour_brewer(palette = "Dark2") +
scale_shape_manual(
  values = c(
    bone = 1, # open circle
    no_use = 17 # filled triangle
  )
)
)
print(Sa_Sq)

```

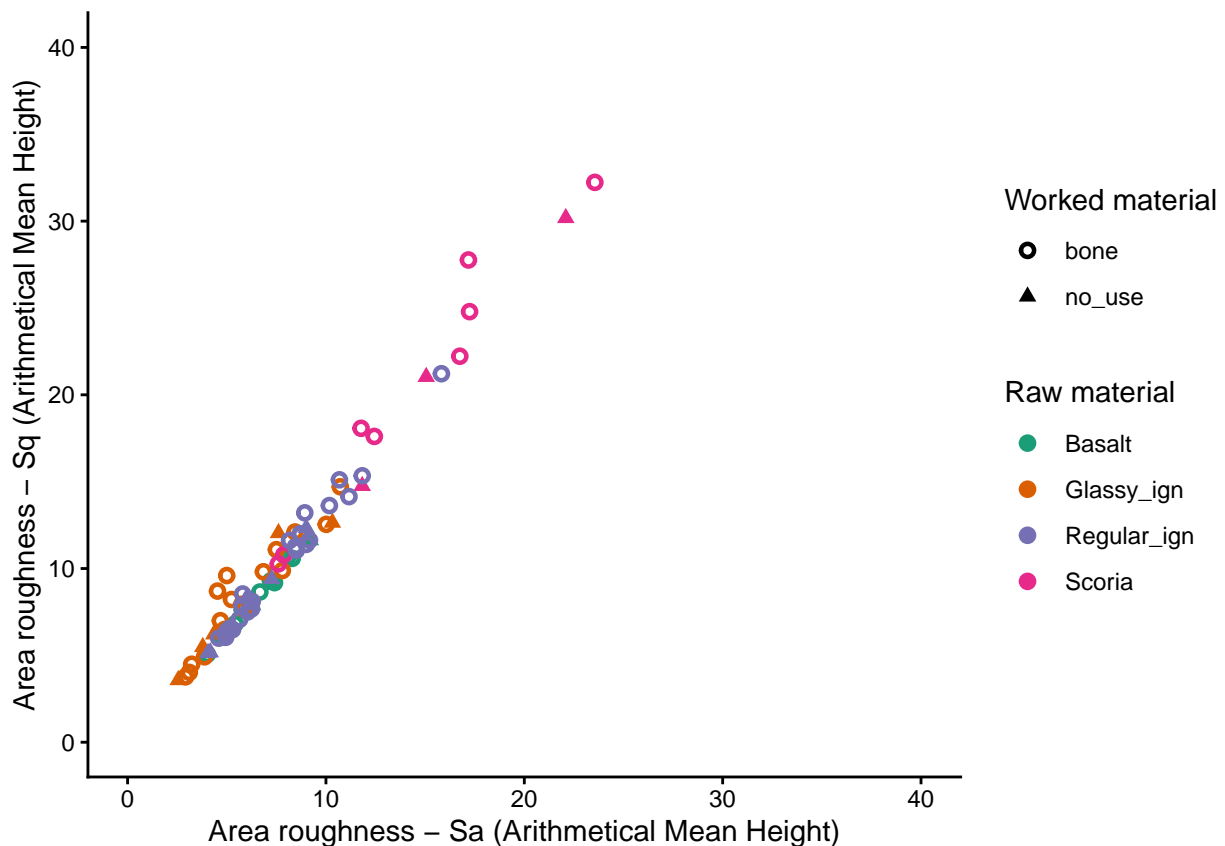

```

file_out <- paste0(file_path_sans_ext(info_in[["file"]]), "_scatterplot_Sa-Sq", ".pdf")
ggsave(filename = file_out, plot = Sa_Sq, path = "analysis/plots", device = "pdf")

```

```
## Saving 6.5 x 4.5 in image
```

```

# Asfc / Smfc → complexity (use-wear intensity)

asfc_smfc <- ggplot(confocaldata) +
  geom_point(
    aes(
      x = Fractal.complexity..Asfc.,
      y = Scale.of.max.complexity..Smfc.,
      colour = Raw_material,
      shape = Worked_material
    ),
    size = 1.5,
    stroke = 1.2
  ) +
  theme_classic() +
  labs(
    x = "Asfc (Area-Scale Fractal Complexity)",
    y = "Smfc (scale of maximum fractal complexity)",
    colour = "Raw material",
    shape = "Worked material"
  ) +
  scale_colour_brewer(palette = "Dark2") +
  scale_shape_manual(
    values = c(
      bone = 1,
      no_use = 17
    )
  )
)

print(asfc_smfc)

```

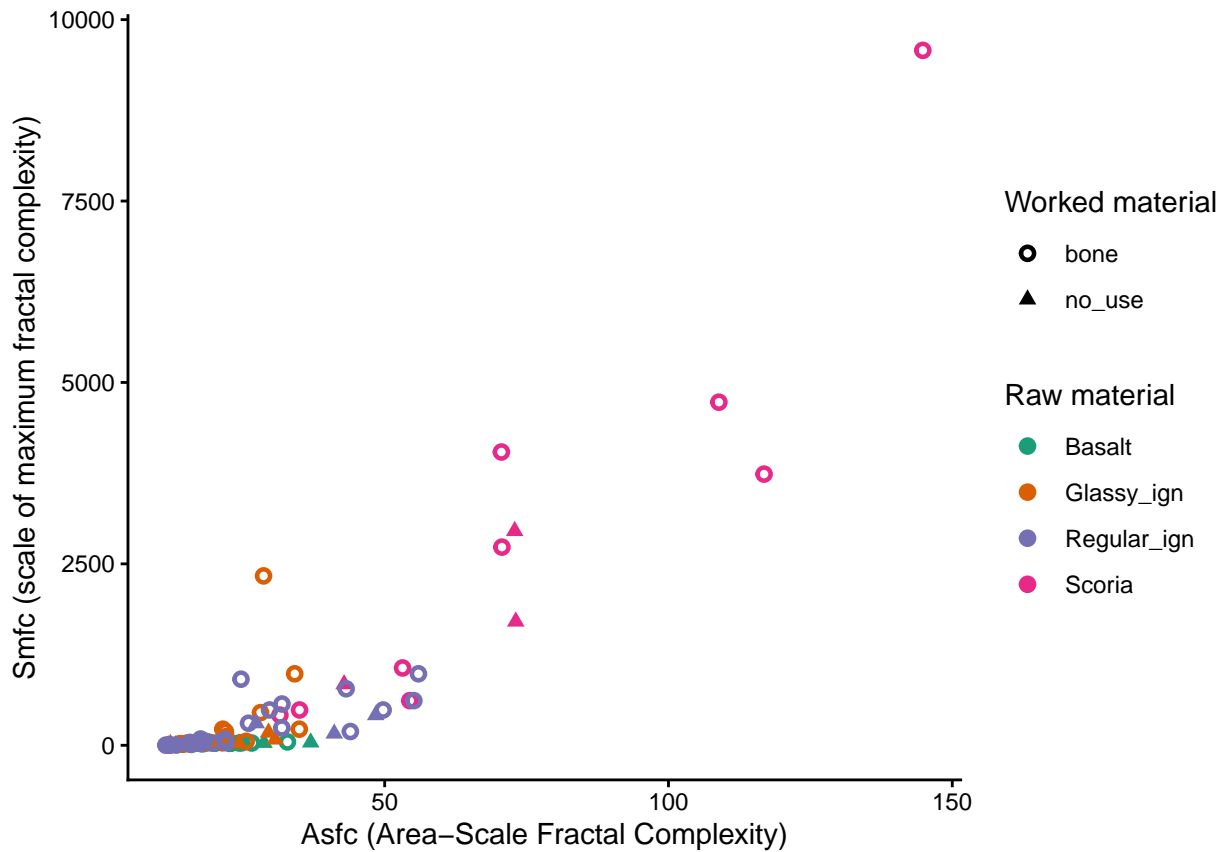

```
file_out <- paste0(file_path_sans_ext(info_in[["file"]]), "_scatterplot_asfc_smfc", ".pdf")
ggsave(filename = file_out, plot = asfc_smfc, path = "analysis/plots", device = "pdf")
```

```
## Saving 6.5 x 4.5 in image
```

```
# epLsar vs. Asfc
```

```
ep_As <- ggplot(confocaldata) +
  geom_point(
    aes(
      x = Fractal.complexity..Asfc.,
      y = Length.scale.anisotropy..Sfrax...epLsar.,
      colour = Raw_material,
      shape = Worked_material
    ),
    size = 1.5,
    stroke = 1.2
  ) +
  theme_classic() +
  labs(
    x = "Fractal complexity",
    y = "Surface anisotropy - epLsar",
    colour = "Raw material",
    shape = "Worked material"
  ) +
  scale_colour_brewer(palette = "Dark2") +
```

```

scale_shape_manual(
  values = c(
    bone = 1,
    no_use = 17
  )
)

print(ep_As)

```

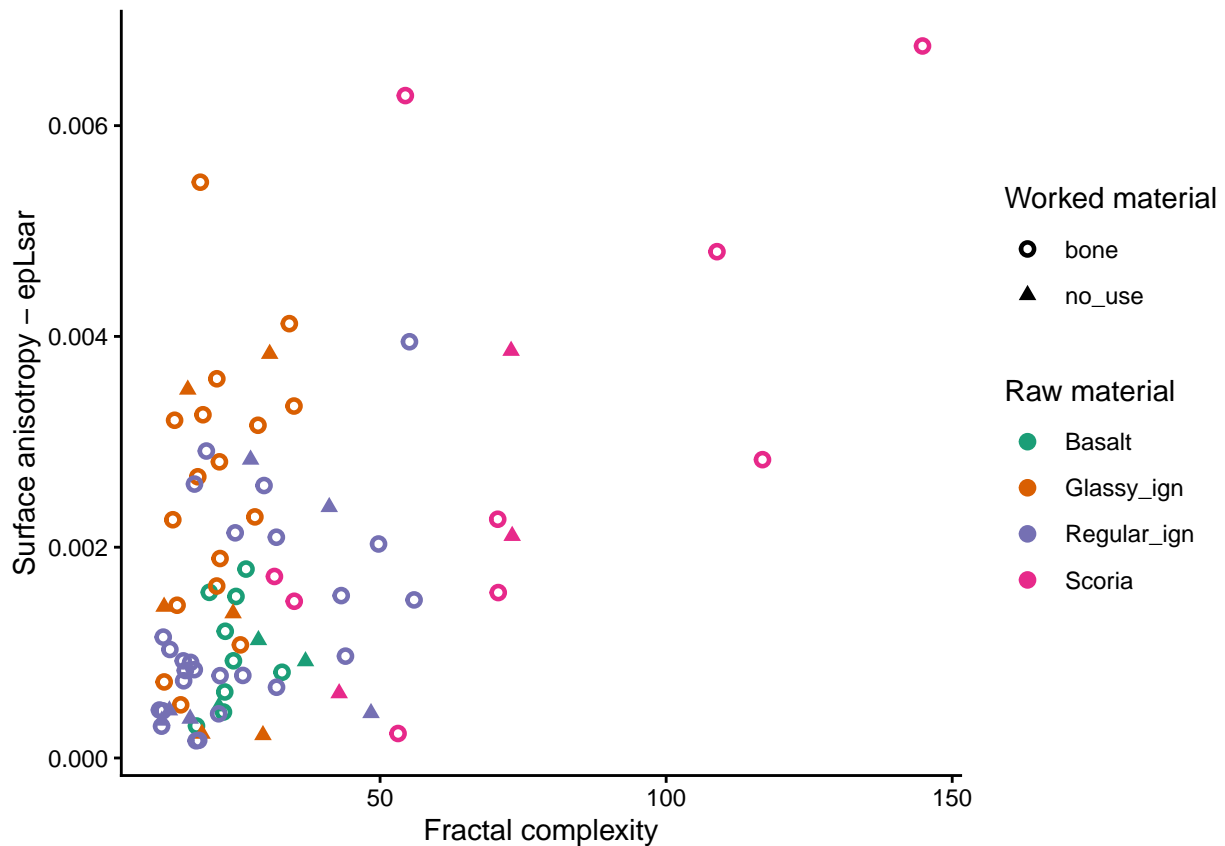

```

file_out <- paste0(file_path_sans_ext(info_in[["file"]]), "_scatterplot_Asfc-epLsar", ".pdf")
ggsave(filename = file_out, plot = ep_As, path = "analysis/plots", device = "pdf")

```

```
## Saving 6.5 x 4.5 in image
```

```
# Vmc → load-bearing core volume against Sq
```

```

Sq_Vmc <- ggplot(confocaldata) +
  geom_point(
    aes(
      x = Sq,
      y = Vmc..p...10...q...80...,
      colour = Raw_material,
      shape = Worked_material
    ),
    size = 1.5,

```

```

stroke = 1.2
) +
coord_cartesian(
  xlim = c(0, 50),
  ylim = c(0, 30)
) +
theme_classic() +
labs(
  x = "Area roughness - Sq (Arithmetical Mean Height)",
  y = "Area roughness - Vmc (Core Material Volume)",
  colour = "Raw material",
  shape = "Worked material"
) +
scale_colour_brewer(palette = "Dark2") +
scale_shape_manual(
  values = c(
    bone = 1,
    no_use = 17
  )
)
)

print(Sq_Vmc)

```

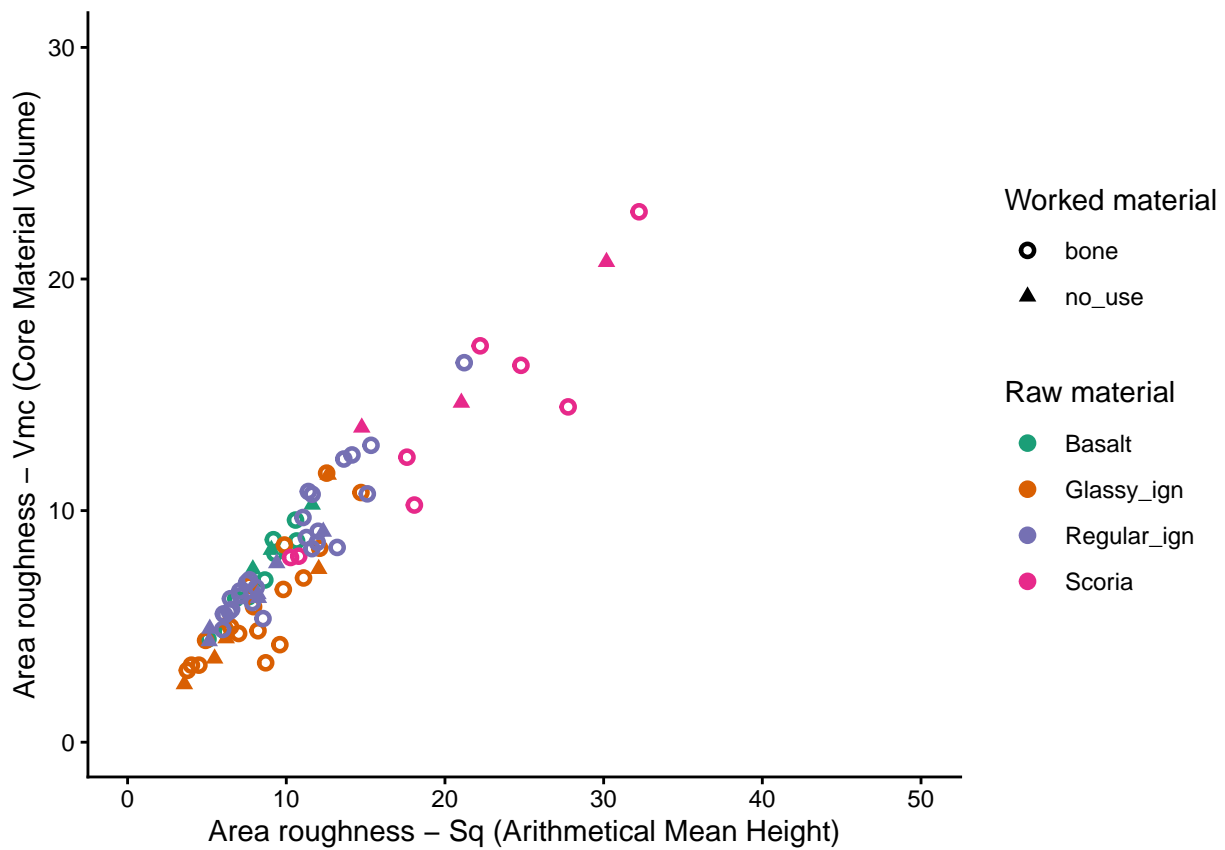

```

file_out <- paste0(file_path_sans_ext(info_in[["file"]]), "_scatterplot_Sq-Vmc", ".pdf")
ggsave(filename = file_out, plot = Sq_Vmc, path = "analysis/plots", device = "pdf")

```

```
## Saving 6.5 x 4.5 in image
```

```
# Furrow depth & density → contact mechanics
```

```
furrows <- ggplot(confocaldata) +  
  geom_point(  
    aes(  
      x = Mean.depth.of.furrows,  
      y = Mean.density.of.furrows,  
      colour = Raw_material,  
      shape = Worked_material  
    ),  
    size = 1.5,  
    stroke = 1.2  
  ) +  
  labs(  
    x = "Mean depth of furrows",  
    y = "Mean density of furrows",  
    colour = "Raw material",  
    shape = "Worked material"  
  ) +  
  scale_colour_brewer(palette = "Dark2") +  
  scale_shape_manual(  
    values = c(  
      bone = 1,  
      no_use = 17  
    )  
  )  
  
print(furrows)
```

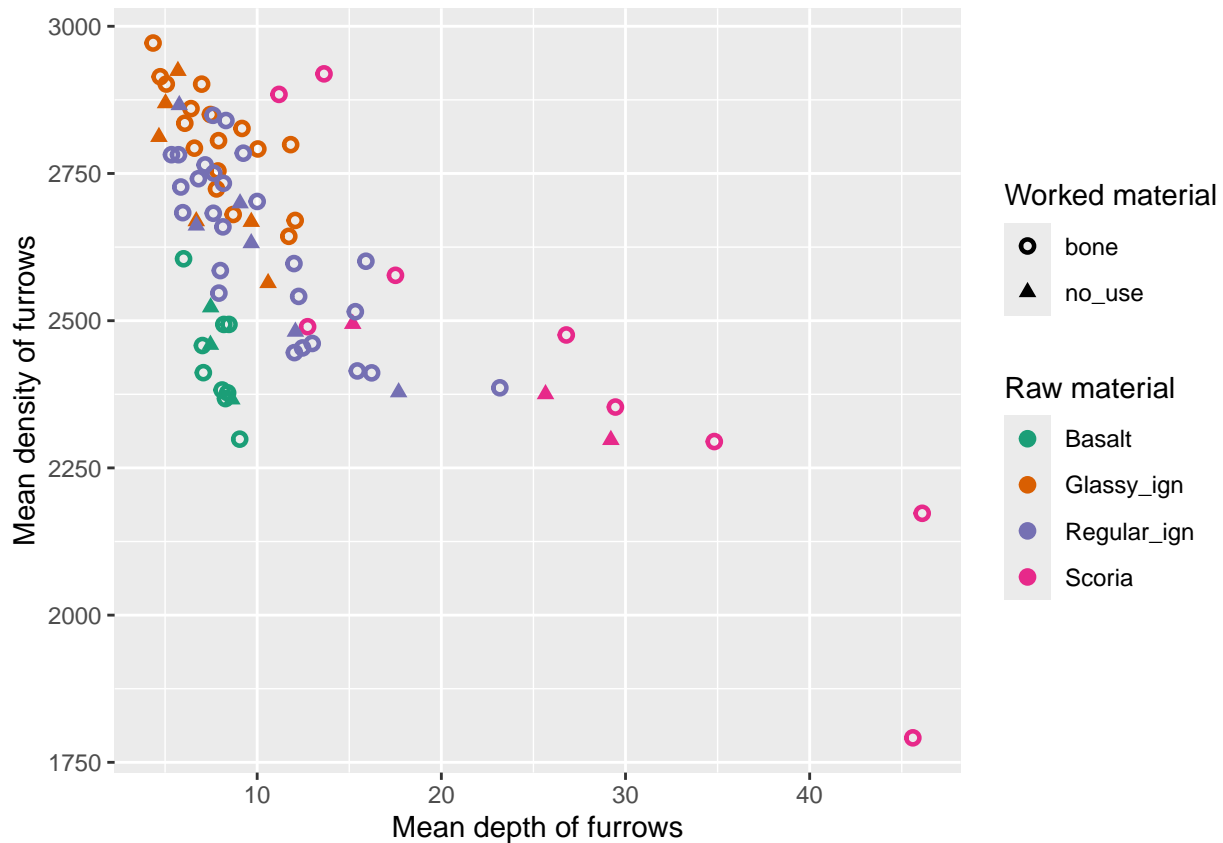

```
file_out <- paste0(file_path_sans_ext(info_in[["file"]]), "_scatterplot_furrows", ".pdf")
ggsave(filename = file_out, plot = furrows, path = "analysis/plots", device = "pdf")
```

```
## Saving 6.5 x 4.5 in image
```

```
# combine all in a single image (rearrange sizes)
```

```
small_theme <- theme(
  axis.title = element_text(size = 9),
  axis.text  = element_text(size = 8),
  legend.title = element_text(size = 9),
  legend.text  = element_text(size = 8)
)
```

```
Sa_Sq <- Sa_Sq + small_theme
Sq_Vmc <- Sq_Vmc + small_theme
furrows <- furrows + small_theme
ep_As <- ep_As + small_theme
```

```
ggarrange(
  Sa_Sq, Sq_Vmc, furrows, ep_As,
  common.legend = TRUE,
  legend = "bottom"
)
```

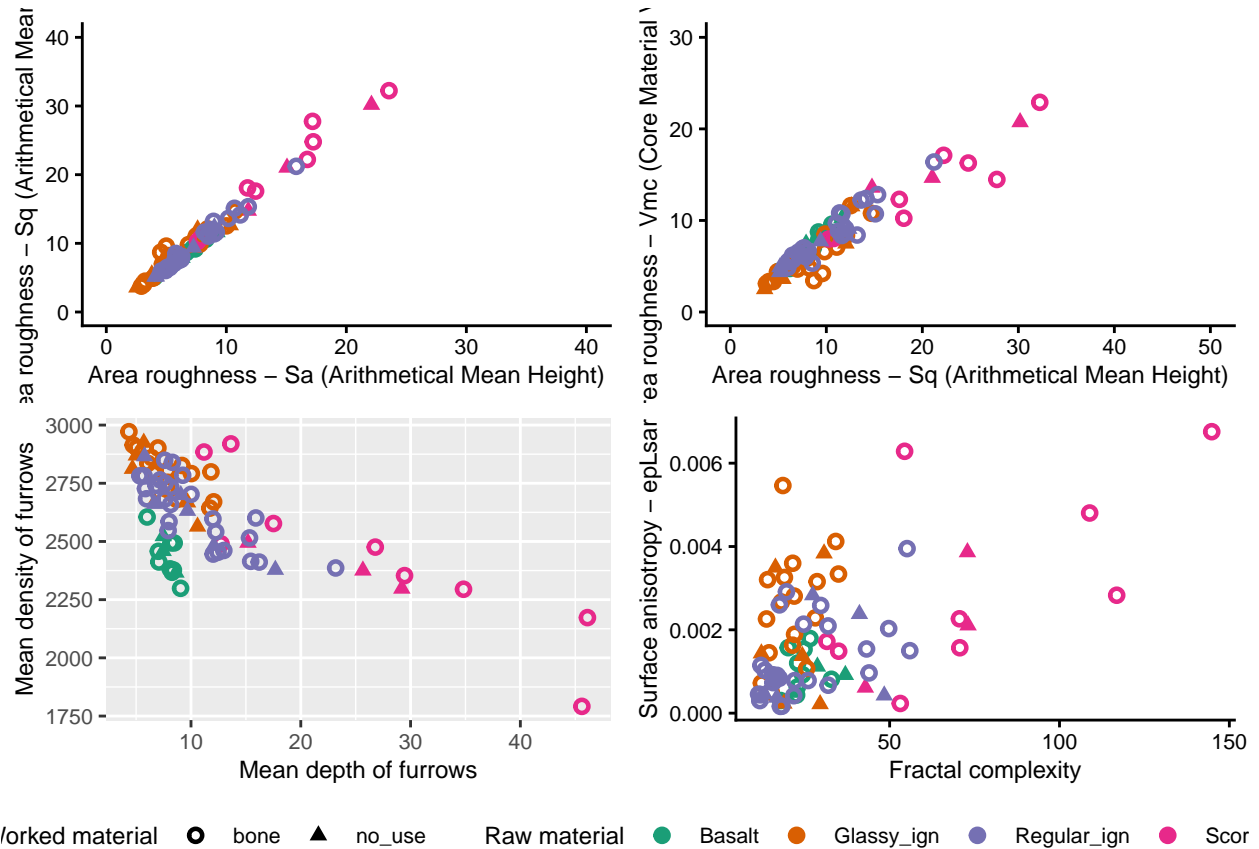

```
ggsave("analysis/plots/scatterplots.png")
```

```
## Saving 6.5 x 4.5 in image
```

### Abbott–Firestone–derived volume parameters (raw material vs worked material)

```
af_long <- confocaldata %>%
  pivot_longer(
    cols = c(Vmc..p...10...q...80..., Vvc..p...10...q...80..., Vvv..p...80...),
    names_to = "Parameter",
    values_to = "Value"
  )

# only Vmc
p_vmc <- ggplot(
  af_long %>% filter(Parameter == "Vmc..p...10...q...80..."),
  aes(
    x = Worked_material,
    y = Value,
    fill = Worked_material
  )
) +
  geom_boxplot(
```

```

alpha = 0.7,
outlier.shape = 21,
outlier.size = 2
) +
facet_wrap(~ Raw_material, scales = "free_y") +
labs(
  title = "",
  x = "Worked material",
  y = expression(Vmc~(mu*m^3/mu*m^2)),
) +
theme_minimal(base_size = 14) +
theme(
  legend.position = "none",
  strip.text = element_text(face = "bold")
)

# all together

p_af_all <- ggplot(
  af_long,
  aes(
    x = Worked_material,
    y = Value,
    fill = Worked_material
  )
) +
geom_boxplot(alpha = 0.7, outlier.shape = NA) +
facet_grid(
  Parameter ~ Raw_material,
  scales = "free_y"
) +
labs(
  title = "Abbott-Firestone-Derived Volume Parameters",
  x = "Worked material",
  y = expression(mu*m^3/mu*m^2)
) +
theme_minimal(base_size = 13) +
theme(
  legend.position = "none",
  strip.text = element_text(face = "bold"),
  axis.text.x = element_text(angle = 45, hjust = 1)
)

# "Higher Vmc values indicate an expansion of the core material portion of the Abbott-Firestone curve,

```

Scatterplot matrix for the ISO 25178 Area scale, Height and volume parameters

```

ggpairs(
  data = confocaldata,
  columns = 23:29,
  cardinality_threshold = 30,

```



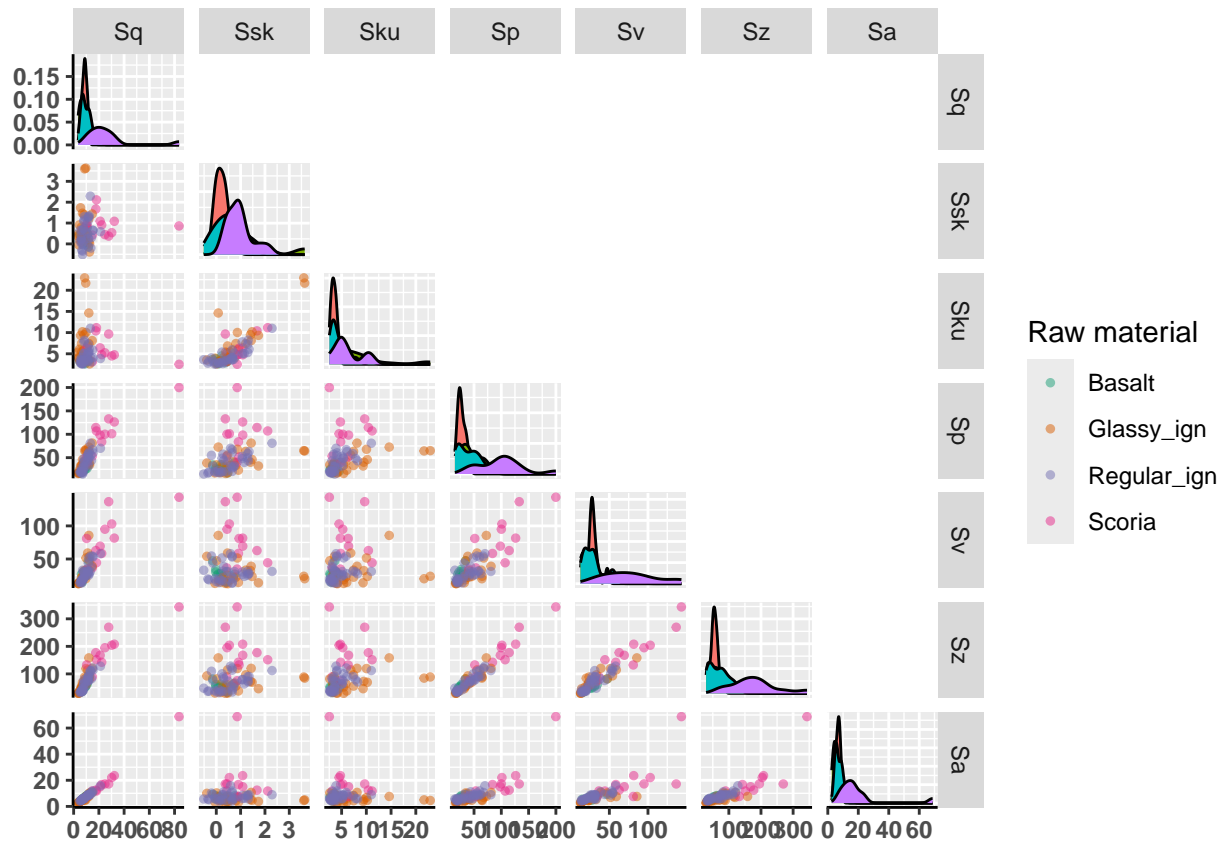

```
ggsave("analysis/plots/confocalarea_matrix.png")
```

```
## Saving 6.5 x 4.5 in image
## Ignoring unknown labels:
## * colour : "Raw material"
## Ignoring unknown labels:
## * colour : "Raw material"
## Ignoring unknown labels:
## * colour : "Raw material"
## Ignoring unknown labels:
## * colour : "Raw material"
## Ignoring unknown labels:
## * colour : "Raw material"
## Ignoring unknown labels:
## * colour : "Raw material"
## Ignoring unknown labels:
## * colour : "Raw material"
## Ignoring unknown labels:
## * colour : "Raw material"
```

```
# Volume parameters
```

```
ggpairs(
  data = confocaldata,
  columns = 36:41,
  cardinality_threshold = 30,
  mapping = ggplot2::aes(colour = Raw_material),
  lower = list(
```



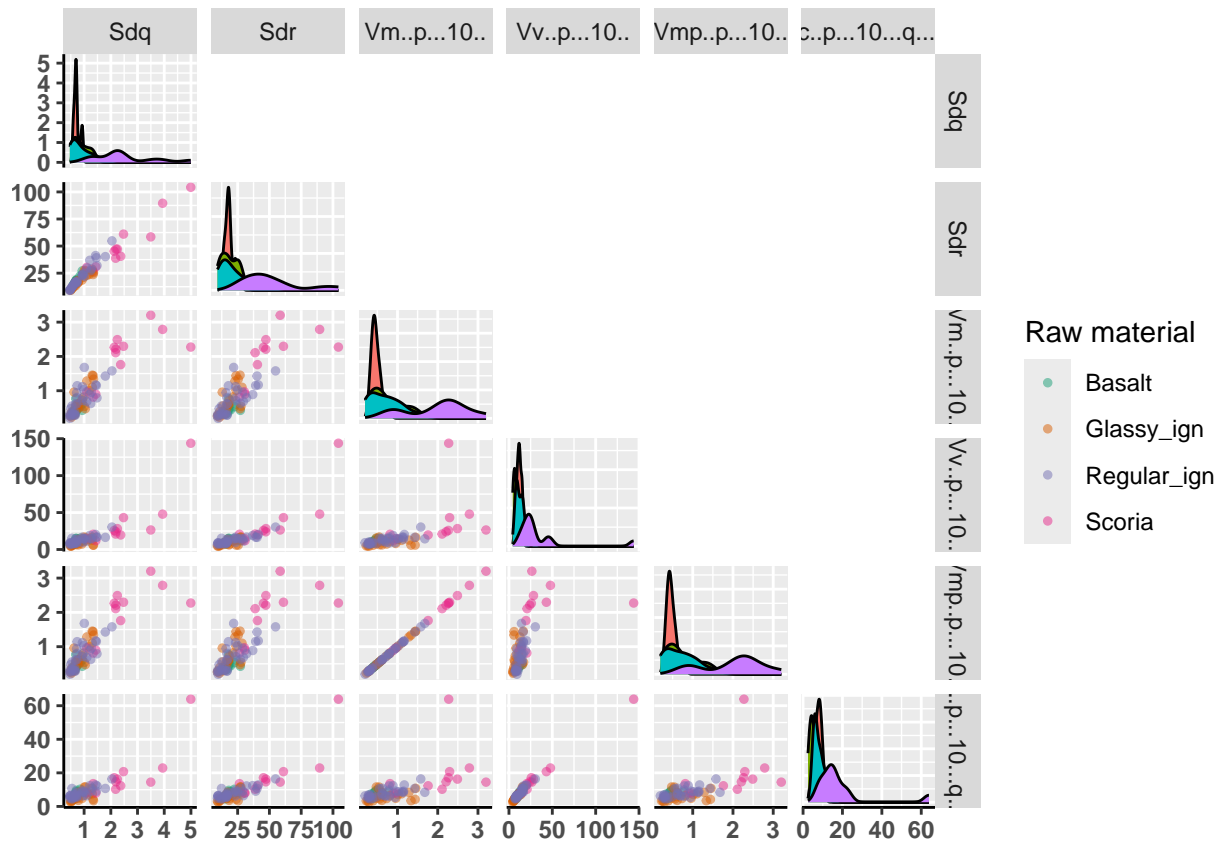

```
ggsave("analysis/plots/confocalvolume_matrix.png")
```

```
## Saving 6.5 x 4.5 in image
## Ignoring unknown labels:
## * colour : "Raw material"
## Ignoring unknown labels:
## * colour : "Raw material"
## Ignoring unknown labels:
## * colour : "Raw material"
## Ignoring unknown labels:
## * colour : "Raw material"
## Ignoring unknown labels:
## * colour : "Raw material"
## Ignoring unknown labels:
## * colour : "Raw material"
```

## Plot confostats for the ISO 25178 Area-scale, Height and volume parameters

```
heightconfostats <- select(confostats, Worked_material, Raw_material, Sq.mean, Ssk.mean, Sku.mean, Sp.mean,
library(ggplot2)

p1 <- ggplot(heightconfostats,
aes(x = Raw_material, y = Sq.mean, colour = Worked_material)) +
```

```

geom_boxplot() +
scale_colour_brewer(palette = "Dark2") +
theme_classic() +
labs(x = "", colour = "Raw material")

p2 <- ggplot(heightconfostats,
             aes(x = Raw_material, y = Ssk.mean, colour = Worked_material)) +
geom_boxplot() +
scale_colour_brewer(palette = "Dark2") +
theme_classic() +
labs(x = "", colour = "Raw material")

p3 <- ggplot(heightconfostats,
             aes(x = Raw_material, y = Sku.mean, colour = Worked_material)) +
geom_boxplot() +
scale_colour_brewer(palette = "Dark2") +
theme_classic() +
labs(x = "", colour = "Raw material")

p4 <- ggplot(heightconfostats,
             aes(x = Raw_material, y = Sp.mean, colour = Worked_material)) +
geom_boxplot() +
scale_colour_brewer(palette = "Dark2") +
theme_classic() +
labs(x = "", colour = "Raw material")

p5 <- ggplot(heightconfostats,
             aes(x = Raw_material, y = Sv.mean, colour = Worked_material)) +
geom_boxplot() +
scale_colour_brewer(palette = "Dark2") +
theme_classic() +
labs(x = "", colour = "Raw material")

p6 <- ggplot(heightconfostats,
             aes(x = Raw_material, y = Sz.mean, colour = Worked_material)) +
geom_boxplot() +
scale_colour_brewer(palette = "Dark2") +
theme_classic() +
labs(x = "", colour = "Raw material")

p7 <- ggplot(heightconfostats,
             aes(x = Raw_material, y = Sa.mean, colour = Worked_material)) +
geom_boxplot() +
scale_colour_brewer(palette = "Dark2") +
theme_classic() +
labs(x = "", colour = "Raw material")

# joint and rescale plots

small_theme <- theme(
  axis.title = element_text(size = 9),
  axis.text  = element_text(size = 8),
  legend.title = element_text(size = 9),

```

```

legend.text = element_text(size = 8)
)

Sa_Sq <- Sa_Sq + small_theme
Sq_Vmc <- Sq_Vmc + small_theme
furrows <- furrows + small_theme
ep_As <- ep_As + small_theme

ggarrange(
  Sa_Sq, Sq_Vmc, furrows, ep_As,
  common.legend = TRUE,
  legend = "bottom"
)

```

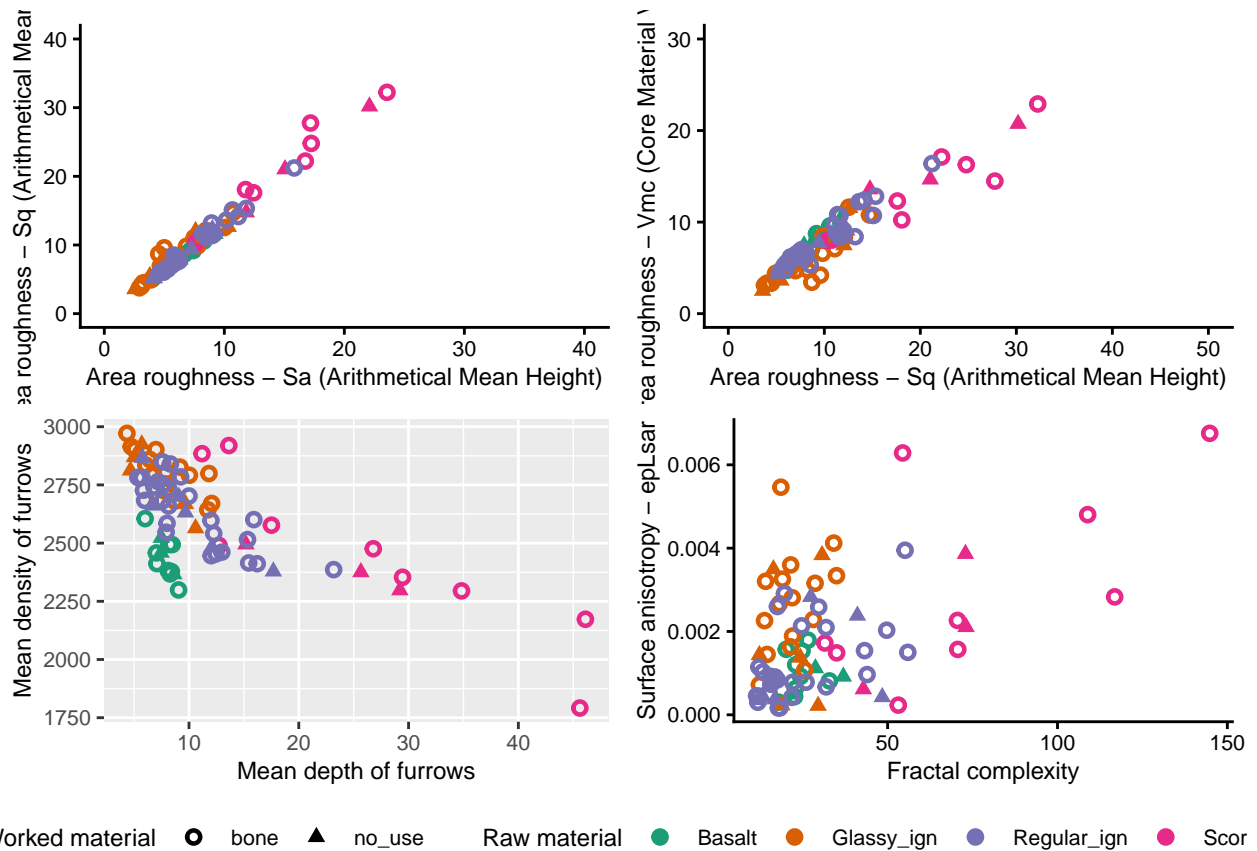

```

ggarrange(p1, p2, p3, p4, p5, p6, p7, common.legend = TRUE, font.label = list(size=8), legend="bottom")

```

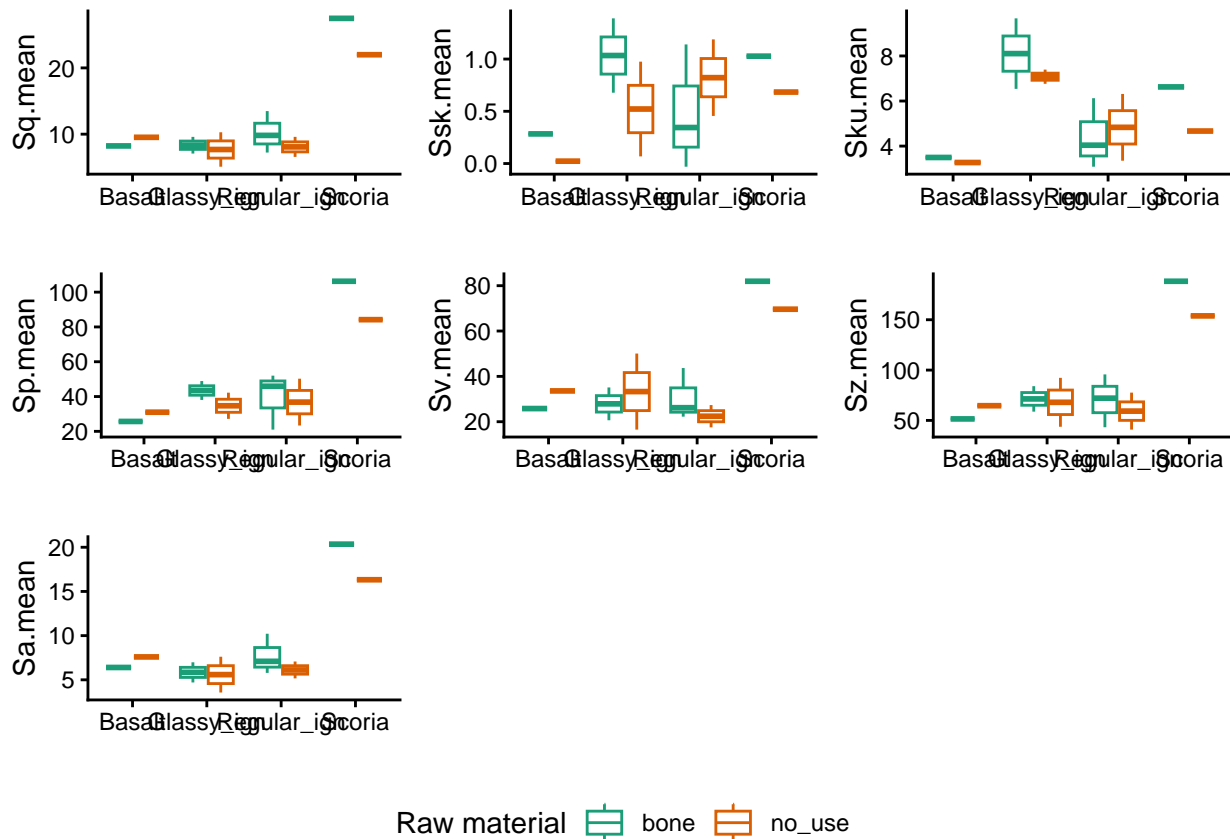

```
ggsave("analysis/plots/confostats_boxplots.png")
```

```
## Saving 6.5 x 4.5 in image
```

```
# Now Volume parameters
```

```
volumeconfostats <- select(confostats,Raw_material,Worked_material, Vm..p...10...mean,Vv..p...10...mean
```

```
p8 <- ggplot(volumeconfostats, aes(x=Raw_material, y=Vm..p...10...mean, colour=Worked_material)) +
  geom_boxplot() +
  scale_colour_brewer(palette = "Dark2") +
  theme_classic() +
  labs(x="", colour="Raw material")
```

```
p9 <- ggplot(volumeconfostats, aes(x=Raw_material, y=Vv..p...10...mean, colour=Worked_material)) +
  geom_boxplot() +
  scale_colour_brewer(palette = "Dark2") +
  theme_classic() +
  labs(x="", colour="Raw material")
```

```
p10 <- ggplot(volumeconfostats, aes(x=Raw_material, y=Vmp..p...10...mean, colour=Worked_material)) +
  geom_boxplot() +
  scale_colour_brewer(palette = "Dark2") +
  theme_classic() +
  labs(x="", colour="Raw material")
```

```

p11 <- ggplot(volumeconfostats, aes(x=Raw_material, y=Vmc..p...10...q...80...mean, colour=Worked_material)) +
  geom_boxplot() +
  scale_colour_brewer(palette = "Dark2") +
  theme_classic() +
  labs(x="", colour="Raw material")

p12 <- ggplot(volumeconfostats, aes(x=Raw_material, y=Vvc..p...10...q...80...mean, colour=Worked_material)) +
  geom_boxplot() +
  scale_colour_brewer(palette = "Dark2") +
  theme_classic() +
  labs(x="", colour="Raw material")

p13 <- ggplot(volumeconfostats, aes(x=Raw_material, y=Vvv..p...80...mean, colour=Worked_material)) +
  geom_boxplot() +
  scale_colour_brewer(palette = "Dark2") +
  theme_classic() +
  labs(x="", colour="Raw material")

# joint and rescale plots

small_theme <- theme(
  axis.title = element_text(size = 9),
  axis.text = element_text(size = 8),
  legend.title = element_text(size = 9),
  legend.text = element_text(size = 8)
)

p8 <- p8 + small_theme
p9 <- p9 + small_theme
p10 <- p10 + small_theme
p11 <- p11 + small_theme
p12 <- p12 + small_theme
p13 <- p13 + small_theme

ggarrange(
  p9, p10, p11, p12, p13,
  common.legend = TRUE,
  legend = "bottom"
)

```

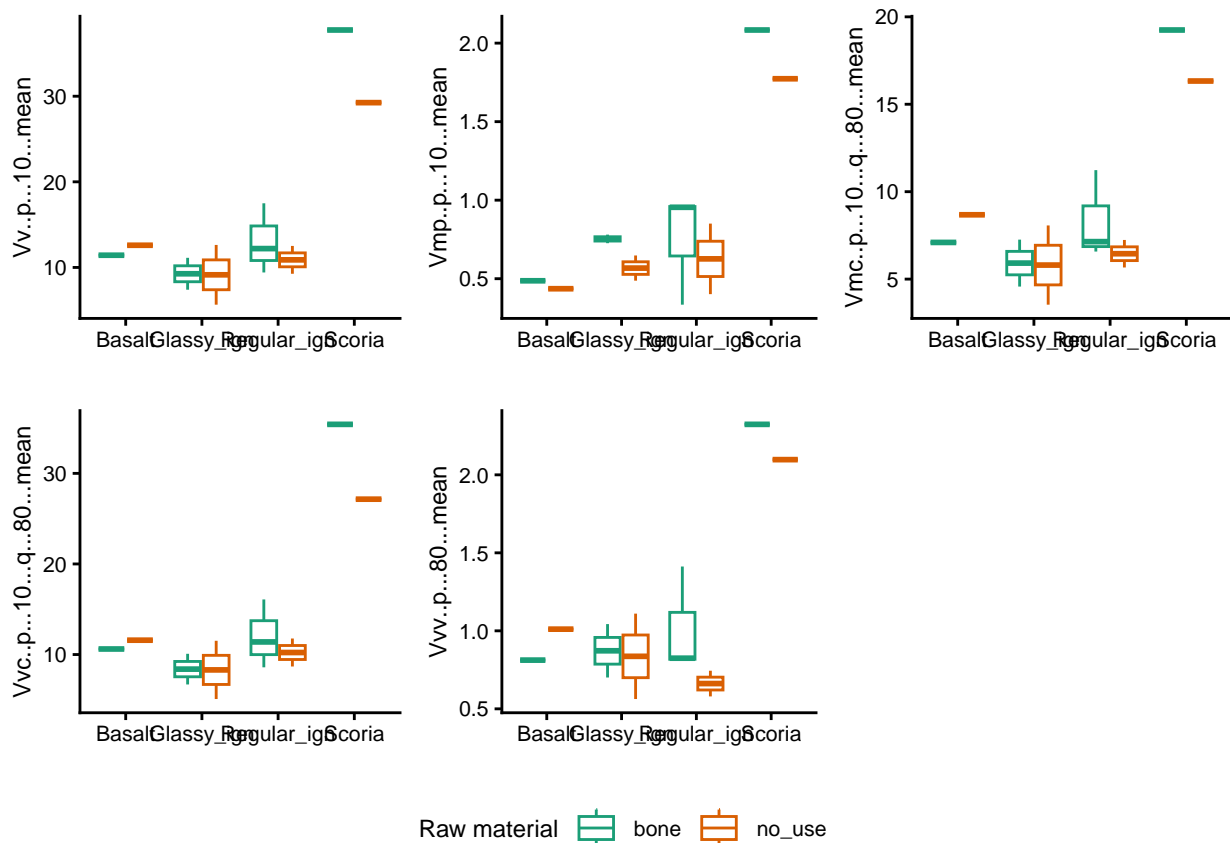

```
ggsave("analysis/plots/confostatsvolume_boxplots.png")
```

```
## Saving 6.5 x 4.5 in image
```

## Multivariate pattern exploration, PCA biplot

```
pca_vars <- c(
  "Sq", "Ssk", "Sku",
  "Vmc.p...10...q...80..", "Vvv.p...80..",
  "Fractal.complexity..Asfc.", "Scale.of.max.complexity..Smfc.",
  "Str..s...0.2."
)

pca_data <- confocaldata %>%
  dplyr::select(all_of(c("Raw_material", "Worked_material", pca_vars))) %>%
  drop_na()

pca_data_clean <- pca_data %>%
  mutate(
    across(
      all_of(pca_vars),
      ~ suppressWarnings(as.numeric(.))
    )
  )
```

```

pca_data_clean <- pca_data_clean %>%
  drop_na(all_of(pca_vars))
pca_res <- PCA(
  pca_data_clean %>% dplyr::select(all_of(pca_vars)),
  scale.unit = TRUE,
  graph = FALSE
)

pca_res <- PCA(
  pca_data_clean %>% dplyr::select(all_of(pca_vars)),
  scale.unit = TRUE,
  graph = FALSE
)

fviz_pca_biplot(
  pca_res,
  geom.ind = "point",
  col.ind = pca_data_clean$Raw_material,
  shape.ind = as.factor(pca_data_clean$Worked_material),
  palette = "Dark2",
  addEllipses = TRUE,
  ellipse.level = 0.95,
  label = "var",
  repel = TRUE,
  legend.title = list(
    col = "Raw material",
    shape = "Worked material"
  )
) +
  theme_minimal(base_size = 14)

```

```

## Warning: Using 'size' aesthetic for lines was deprecated in ggplot2 3.4.0.
## i Please use 'linewidth' instead.
## i The deprecated feature was likely used in the ggpubr package.
##   Please report the issue at <https://github.com/kassambara/ggpubr/issues>.
## This warning is displayed once every 8 hours.
## Call 'lifecycle::last_lifecycle_warnings()' to see where this warning was
## generated.

```

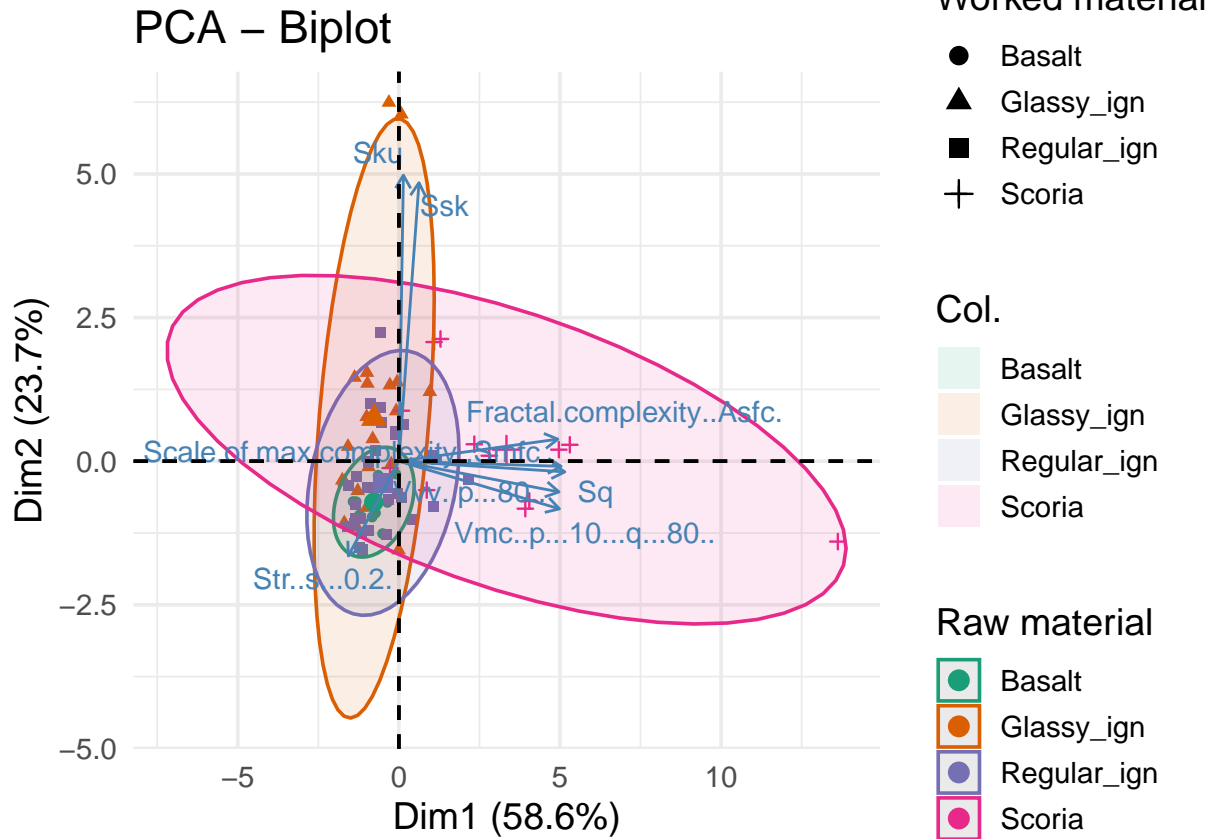

## End and Session info

```
sessionInfo()
```

```
## R version 4.3.0 (2023-04-21)
## Platform: aarch64-apple-darwin20 (64-bit)
## Running under: macOS 26.2
##
## Matrix products: default
## BLAS: /Library/Frameworks/R.framework/Versions/4.3-arm64/Resources/lib/libRblas.0.dylib
## LAPACK: /Library/Frameworks/R.framework/Versions/4.3-arm64/Resources/lib/libRlapack.dylib; LAPACK v
##
## locale:
## [1] en_US.UTF-8/en_US.UTF-8/en_US.UTF-8/C/en_US.UTF-8/en_US.UTF-8
##
## time zone: Europe/Berlin
## tzcode source: internal
##
## attached base packages:
## [1] tools stats graphics grDevices utils datasets methods
## [8] base
##
## other attached packages:
```

```

## [1] factoextra_1.0.7 FactoMineR_2.11 ggthemes_5.1.0 ggpubr_0.6.2
## [5] doBy_4.7.0 GGally_2.4.0 kableExtra_1.4.0 janitor_2.2.1
## [9] knitr_1.50 lubridate_1.9.4 forcats_1.0.1 stringr_1.6.0
## [13] dplyr_1.1.4 purrr_1.2.0 readr_2.1.6 tidyr_1.3.1
## [17] tibble_3.3.0 ggplot2_4.0.1 tidyverse_2.0.0
##
## loaded via a namespace (and not attached):
## [1] tidysselect_1.2.1 viridisLite_0.4.2 farver_2.1.2
## [4] S7_0.2.1 fastmap_1.2.0 TH.data_1.1-5
## [7] digest_0.6.39 timechange_0.3.0 estimability_1.5.1
## [10] lifecycle_1.0.4 cluster_2.1.8.1 Deriv_4.2.0
## [13] multcompView_0.1-10 survival_3.8-3 magrittr_2.0.4
## [16] compiler_4.3.0 rlang_1.1.6 yaml_2.3.10
## [19] ggsignif_0.6.4 labeling_0.4.3 htmlwidgets_1.6.4
## [22] bit_4.6.0 scatterplot3d_0.3-44 xml2_1.3.8
## [25] RColorBrewer_1.1-3 abind_1.4-8 multcomp_1.4-29
## [28] withr_3.0.2 grid_4.3.0 xtable_1.8-4
## [31] emmeans_2.0.0 scales_1.4.0 MASS_7.3-60.0.1
## [34] tinytex_0.58 flashClust_1.01-2 cli_3.6.5
## [37] mvtnorm_1.3-3 crayon_1.5.3 rmarkdown_2.30
## [40] ragg_1.5.0 generics_0.1.4 rstudioapi_0.17.1
## [43] modelr_0.1.11 tzdb_0.5.0 splines_4.3.0
## [46] parallel_4.3.0 vctrs_0.6.5 boot_1.3-32
## [49] Matrix_1.6-5 sandwich_3.1-1 carData_3.0-5
## [52] car_3.1-3 hms_1.1.4 bit64_4.6.0-1
## [55] rstatix_0.7.3 ggrepel_0.9.6 Formula_1.2-5
## [58] systemfonts_1.3.1 glue_1.8.0 ggstats_0.11.0
## [61] codetools_0.2-20 DT_0.33 cowplot_1.2.0
## [64] stringi_1.8.7 gtable_0.3.6 pillar_1.11.1
## [67] htmltools_0.5.8.1 R6_2.6.1 microbenchmark_1.5.0
## [70] textshaping_1.0.4 vroom_1.6.5 evaluate_1.0.5
## [73] lattice_0.22-7 backports_1.5.0 leaps_3.2
## [76] broom_1.0.8 snakecase_0.11.1 Rcpp_1.1.0
## [79] gridExtra_2.3 svglite_2.2.1 xfun_0.54
## [82] zoo_1.8-14 pkgconfig_2.0.3

```
